# Supplementary material for: A DNA assembly toolkit to unlock the CRISPR/Cas9 potential for metabolic engineering
Source: Research Square preprint supplement (doi:10.21203/rs.3.rs-2738543/v1), 2023-04-04
Supplement: Supplementary file 2 [file 89a7ad205c1df4984f21a217.docx]

**Supplementary Experiments**

**6. ASSESSING THE EFFICIENCY OF THE TOOLKIT**

**6.1 Pro Module**

The efficiency of DNA assembly of new promoters was tested using *ALK1* promoter of *Y. lipolytica* as an example. The assembly was done following procedures described in the Sections 1.8 of Supplementary Manual. The DNA parts involved in the assembly are summarised in Table S17. Plasmid DNA was isolated from 18 clones and restriction analysis was performed using BsaI enzyme (Fig. S29). The observed assembly efficiency of pProUA-ALK1 plasmid was 100% (18/18).


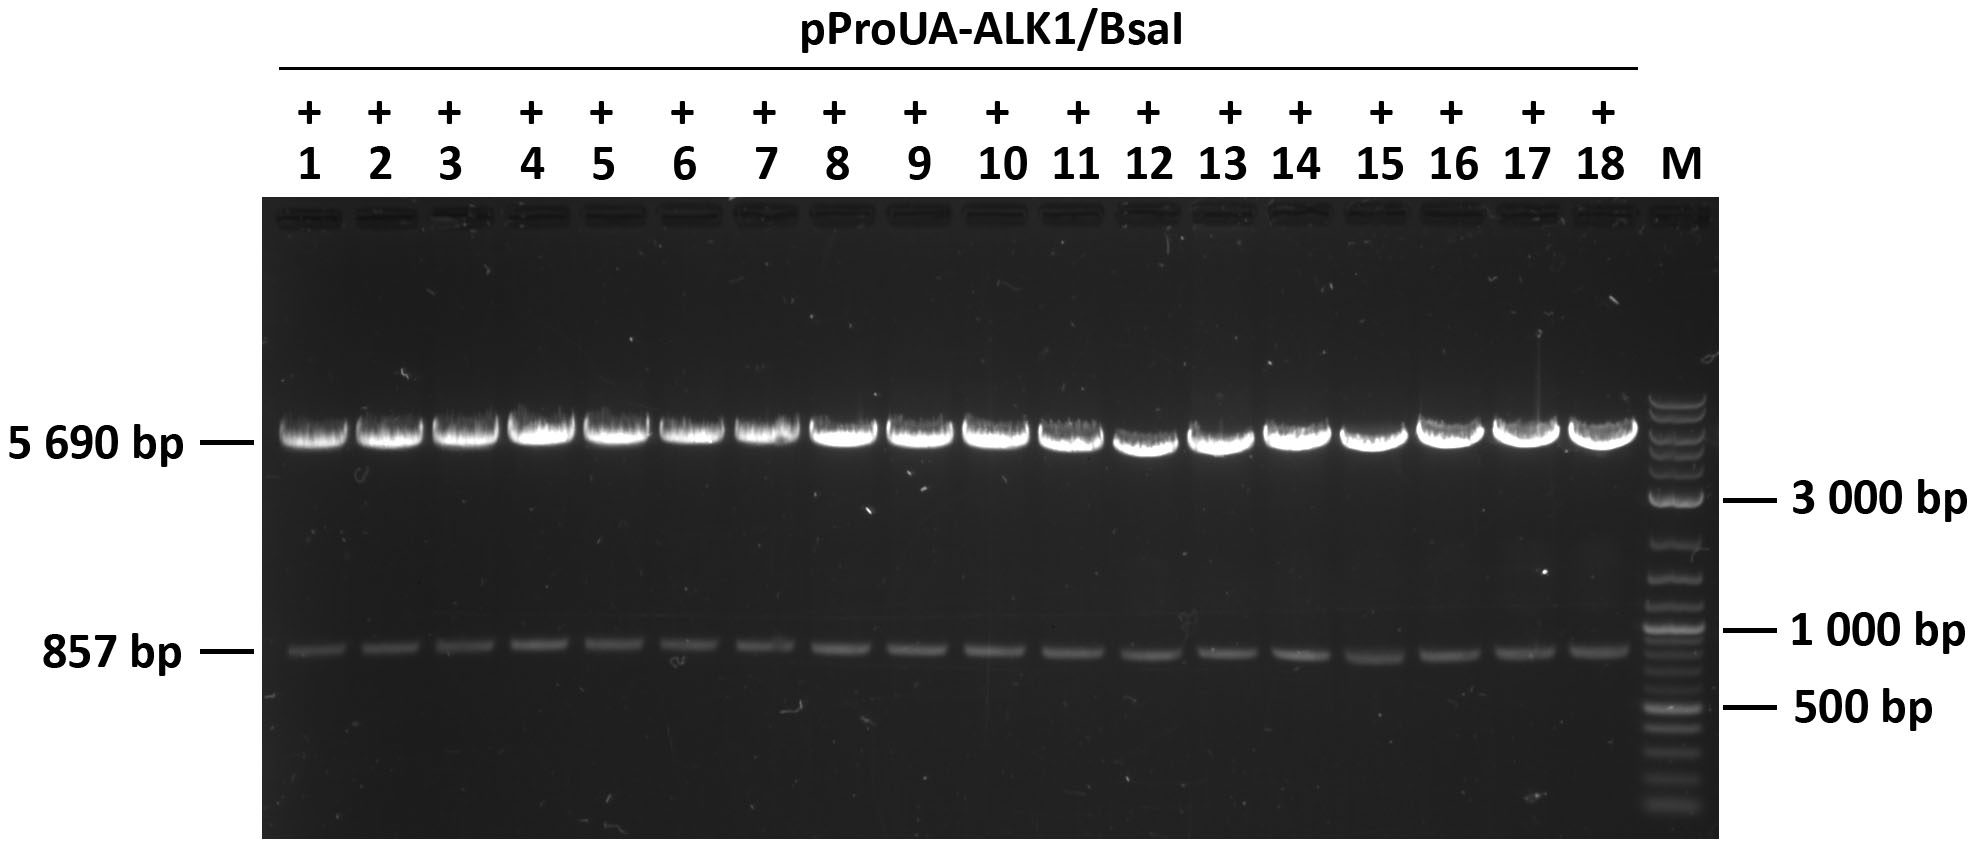


**Fig. S29** The restriction analysis of clones isolated from pProUA-ALK1 assembly using BsaI. The restriction fragments corresponding to pProUA-ALK1 are shown on the left side. The major bands of the molecular weight marker NEB #B7025 (M) are shown on the right side. Correctly assembled clones are designated with pluses above the clone numbers.

**6.2 Del Module**

The DNA assembly efficiency of of pDel-series plasmids was tested using *AAT1* gene of *Y. lipolytica* as an example. The assembly was done following procedures described in the Sections 1.4 of Supplementary Manual. DNA parts involved in the assembly were summarised in Table S17. Plasmid DNA was isolated from 18 clones and restriction analysis was performed using MssI enzyme (Fig. S30). The observed assembly efficiency of pDelUK-AAT1 plasmid was 50% (9/18).


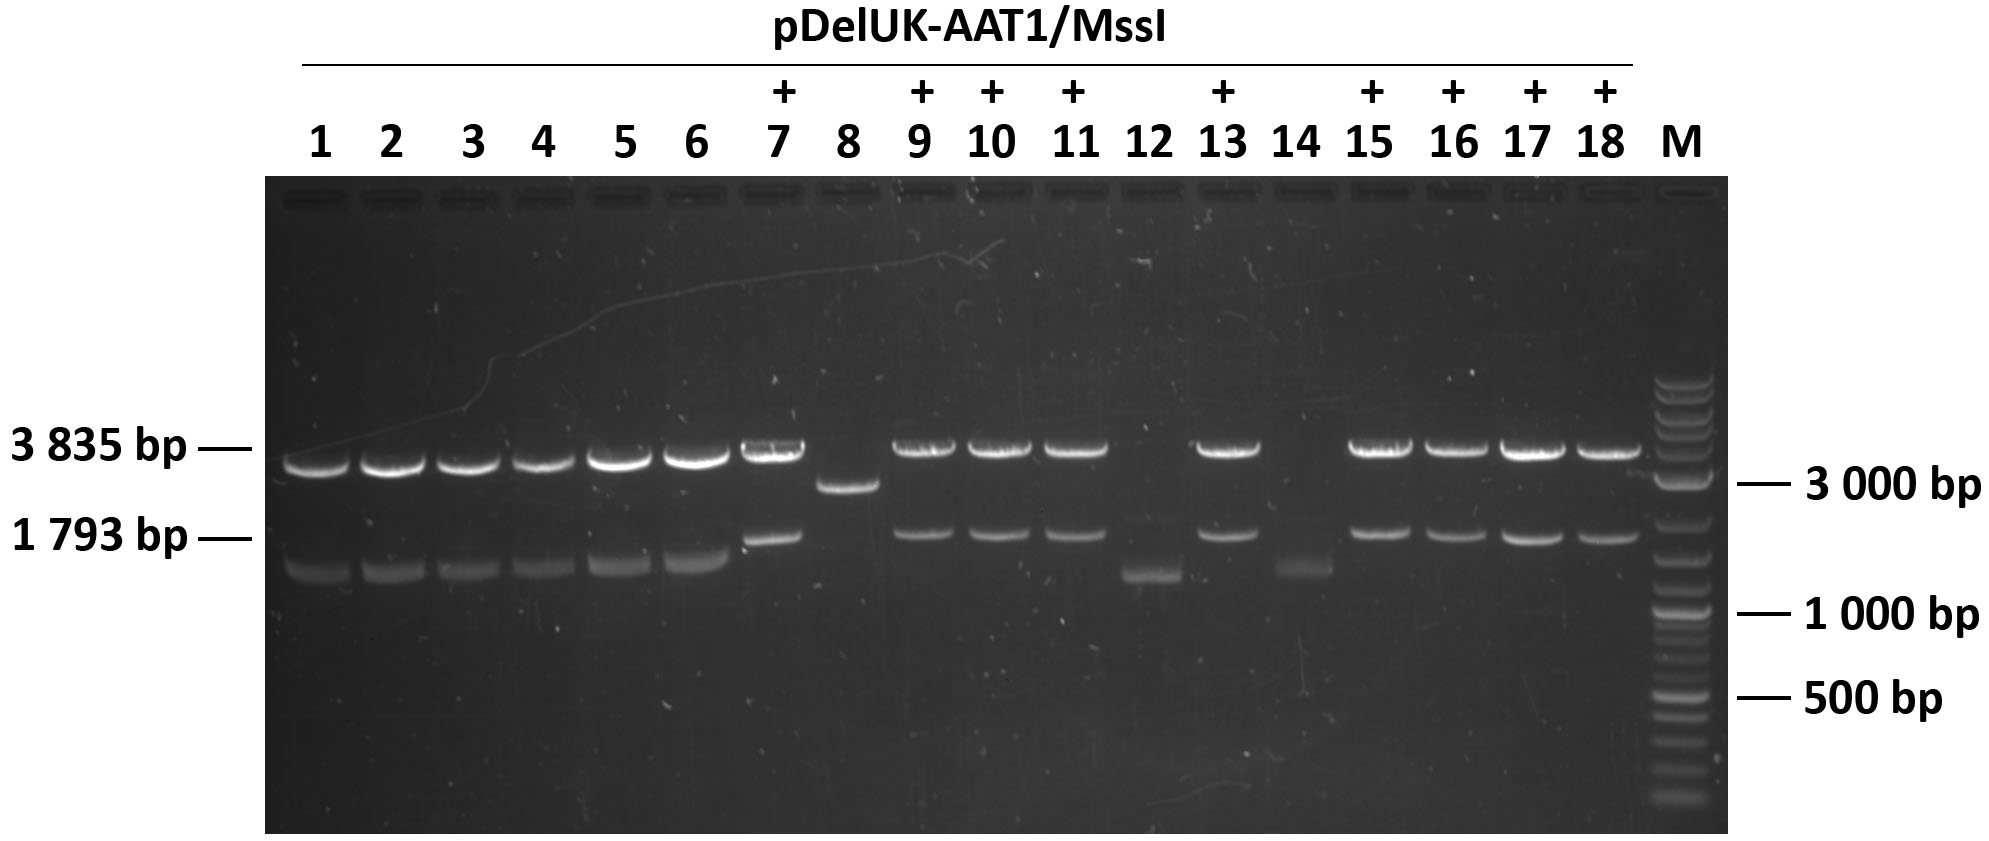


**Fig. S30** The restriction analysis of clones isolated from pDelUK-AAT1 assembly using MssI. Restriction fragments corresponding to pDelUK-AAT1 are shown on the left side. Major bands of the molecular weight marker NEB #B7025 (M) are shown on the right side. The correctly assembled clones are designated by pluses above the clone numbers.

**6.3 Int Module - exchange of homology arms between Lvl1 and Lvl2**

The efficiency of homology arms exchange between Lvl1 and Lvl2 was tested using plasmids pE8US1.1 and pZUA2.3-HPD1-ARO4-ARO7 as an example (Table S17). The assembly was done following procedures described in Sections 1.5.1 of Supplementary Manual. Plasmid DNA was isolated from 8 clones and restriction analysis was performed using PaqI enzyme (Fig. S31). The observed assembly efficiency of pE8US-HPD1-ARO4-ARO7 plasmid was 100% (8/8).


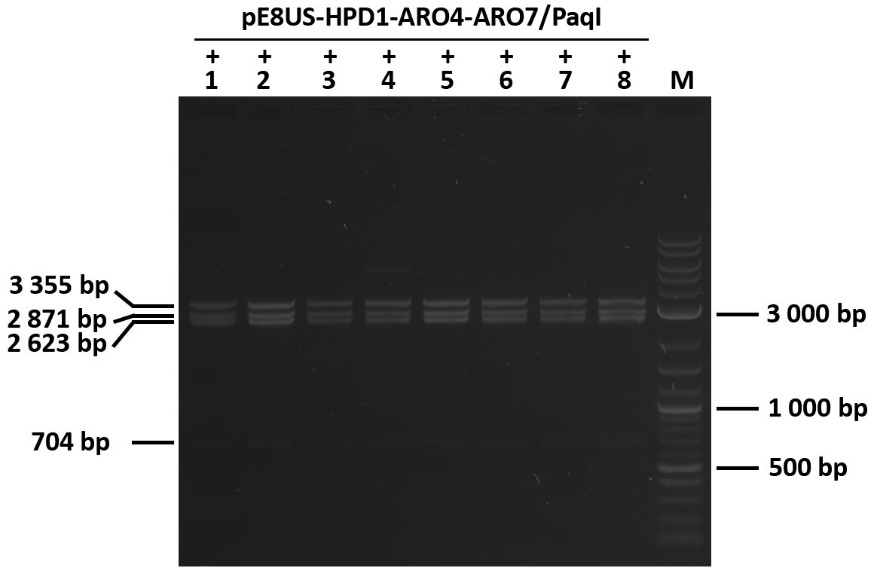


**Fig. S31** The restriction analysis of clones isolated from pE8US-HPD1-ARO4-ARO7 assembly using PaqI. The restriction fragments corresponding to pE8US-HPD1-ARO4-ARO7 are shown on the left side. The major bands of the molecular weight marker NEB #B7025 (M) are shown on the right side. The correctly assembled clones are selected by pluses above the clone numbers.

**6.4 Int Module - Transfer of homology arms from pDel-series to Lvl1 and Lvl2**

The efficiency of homology arms transfer from pDel-series to Lvl1 and Lvl2 was tested using plasmids pE8US-HPD1-ARO4-ARO7 and pDelUK-AAT1 as an example (Table S17). The assembly was done following procedures described in Sections 1.5.2 of Supplementary Manual. Plasmid DNA was isolated from 12 clones and restriction analysis was performed using MssI enzyme (Fig. S32). The observed assembly efficiency of pDelUK-AAT1::HPD1-ARO4-ARO7 plasmid was 58.3% (7/12).


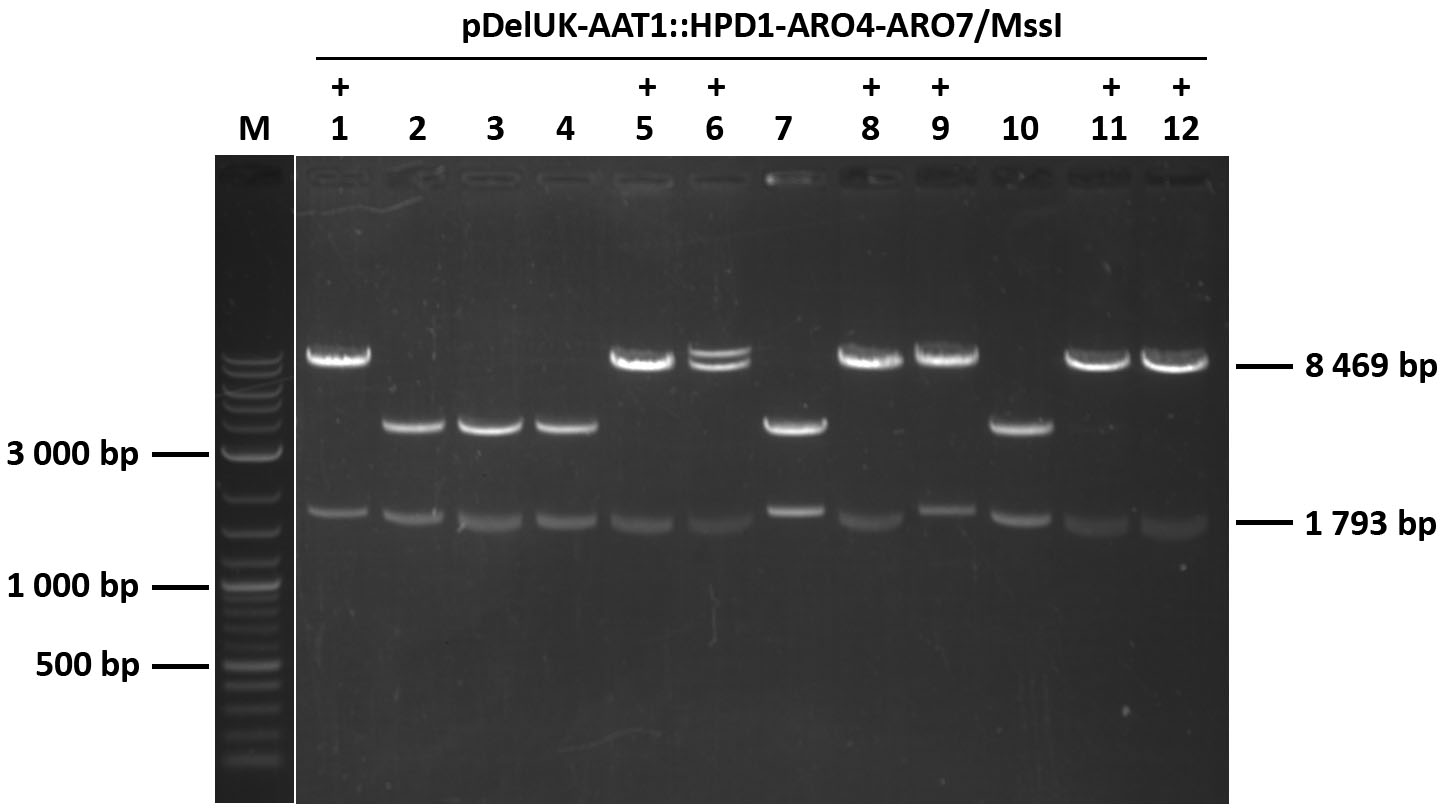


**Fig. S32** The restriction analysis of clones isolated from pDelUK-AAT1::HPD1-ARO4-ARO7 assembly using MssI. Restriction fragments corresponding to pDelUK-AAT1::HPD1-ARO4-ARO7 are shown on the right side. Major bands of the molecular weight marker NEB #B7025 (M) are shown on the left side. The extra band of clone 6 above 8 469 bp supposed to be a fragment with size 10 262 bp corresponding to incomplete restriction of the plasmid pDelUK-AAT1::HPD1-ARO4-ARO7. Correctly assembled clones are selected by pluses above the clone numbers.

**6.5 MEx Module**

The efficiency of the yeast selectable marker excision was tested using plasmidspC2US1.1-hrGFP, pD12US1.1-hrGFP, and pE8US1.1-hrGFP as examples (Table S17). The marker excision was done following procedures described in Sections 1.6 of Supplementary Manual. Plasmid DNA was isolated from 8 clones from each experiment and restriction analysis was performed using NotI enzyme (Fig. S33). The observed marker excision efficiency was 100% (24/24).


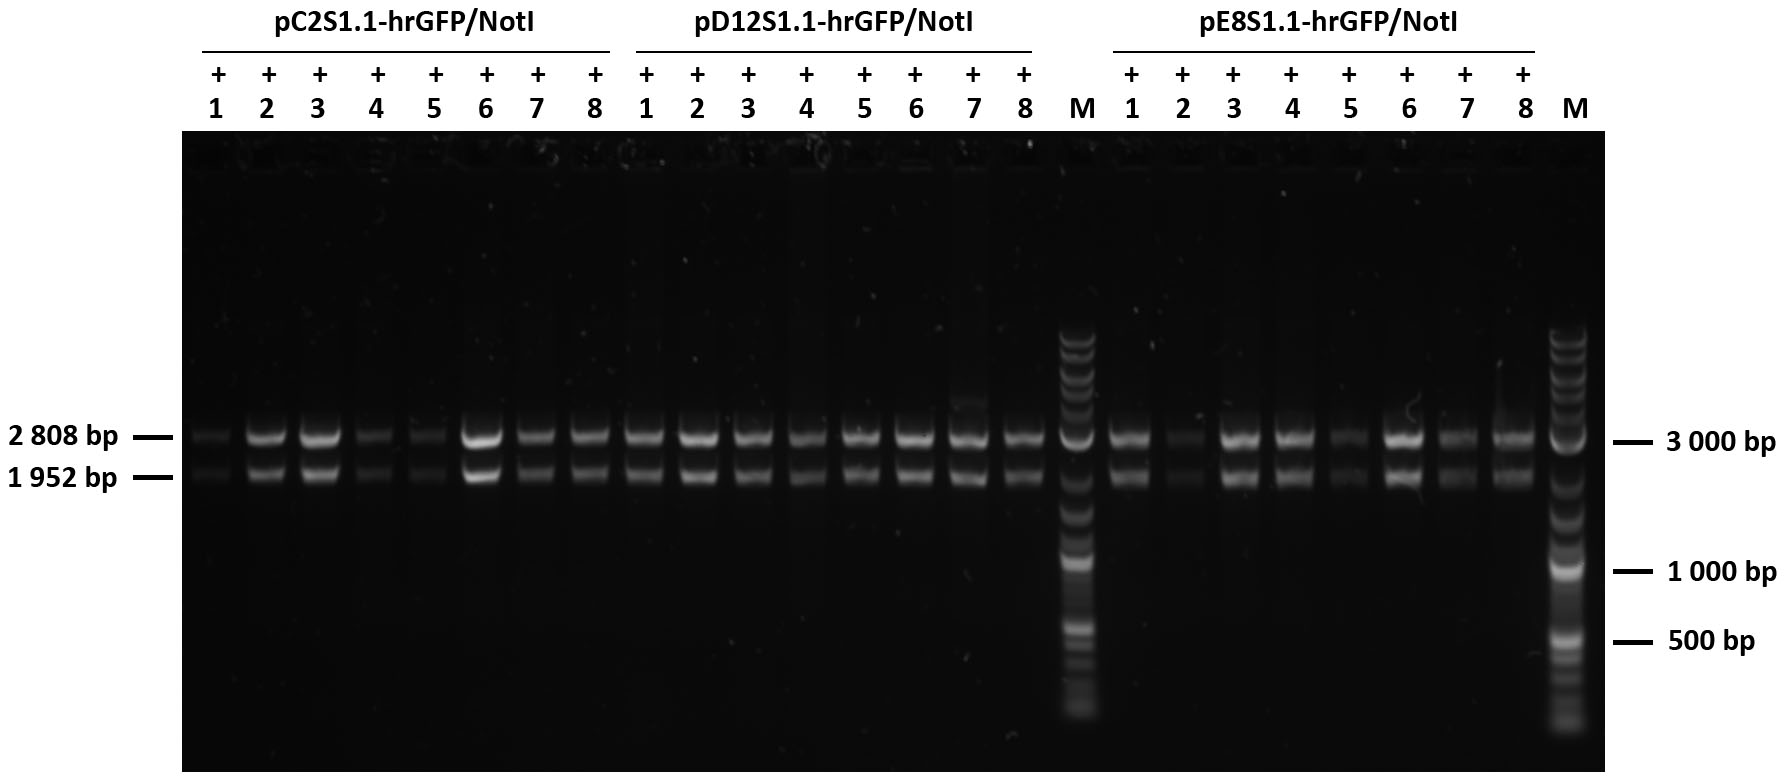


**Fig. S33** The restriction analysis of clones isolated after marker excision from plasmids pC2US1.1-hrGFP, pD12US1.1-hrGFP, and pE8US1.1-hrGFP. The fragments corresponding NotI restriction of markerless plasmids pC2S1.1-hrGFP, pD12S1.1-hrGFP, and pE8S1.1-hrGFP are shown on the left side. The major bands of the molecular weight marker NEB #B7025 (M) are shown on the right side. The correctly assembled clones are designated by pluses above the clone numbers.

**6.6 Cas Module**

The efficiency of DNA assembly of Cas9-helper plasmids was tested using three randomly generated 20-base recognition sequencesas examples. The assemblies were done following procedures described in Sections 1.7 of Supplementary Manual. DNA parts involved in the assembly were summarised in Table S17. Plasmid DNA was isolated from 34 clones and restriction analysis was performed using HindIII enzyme (Fig. S34). The observed assembly efficiency of plasmids pCasNA-Rdm1, pCasNA-Rdm2 and pCasNA-Rdm3 was 79.4% (27/34).


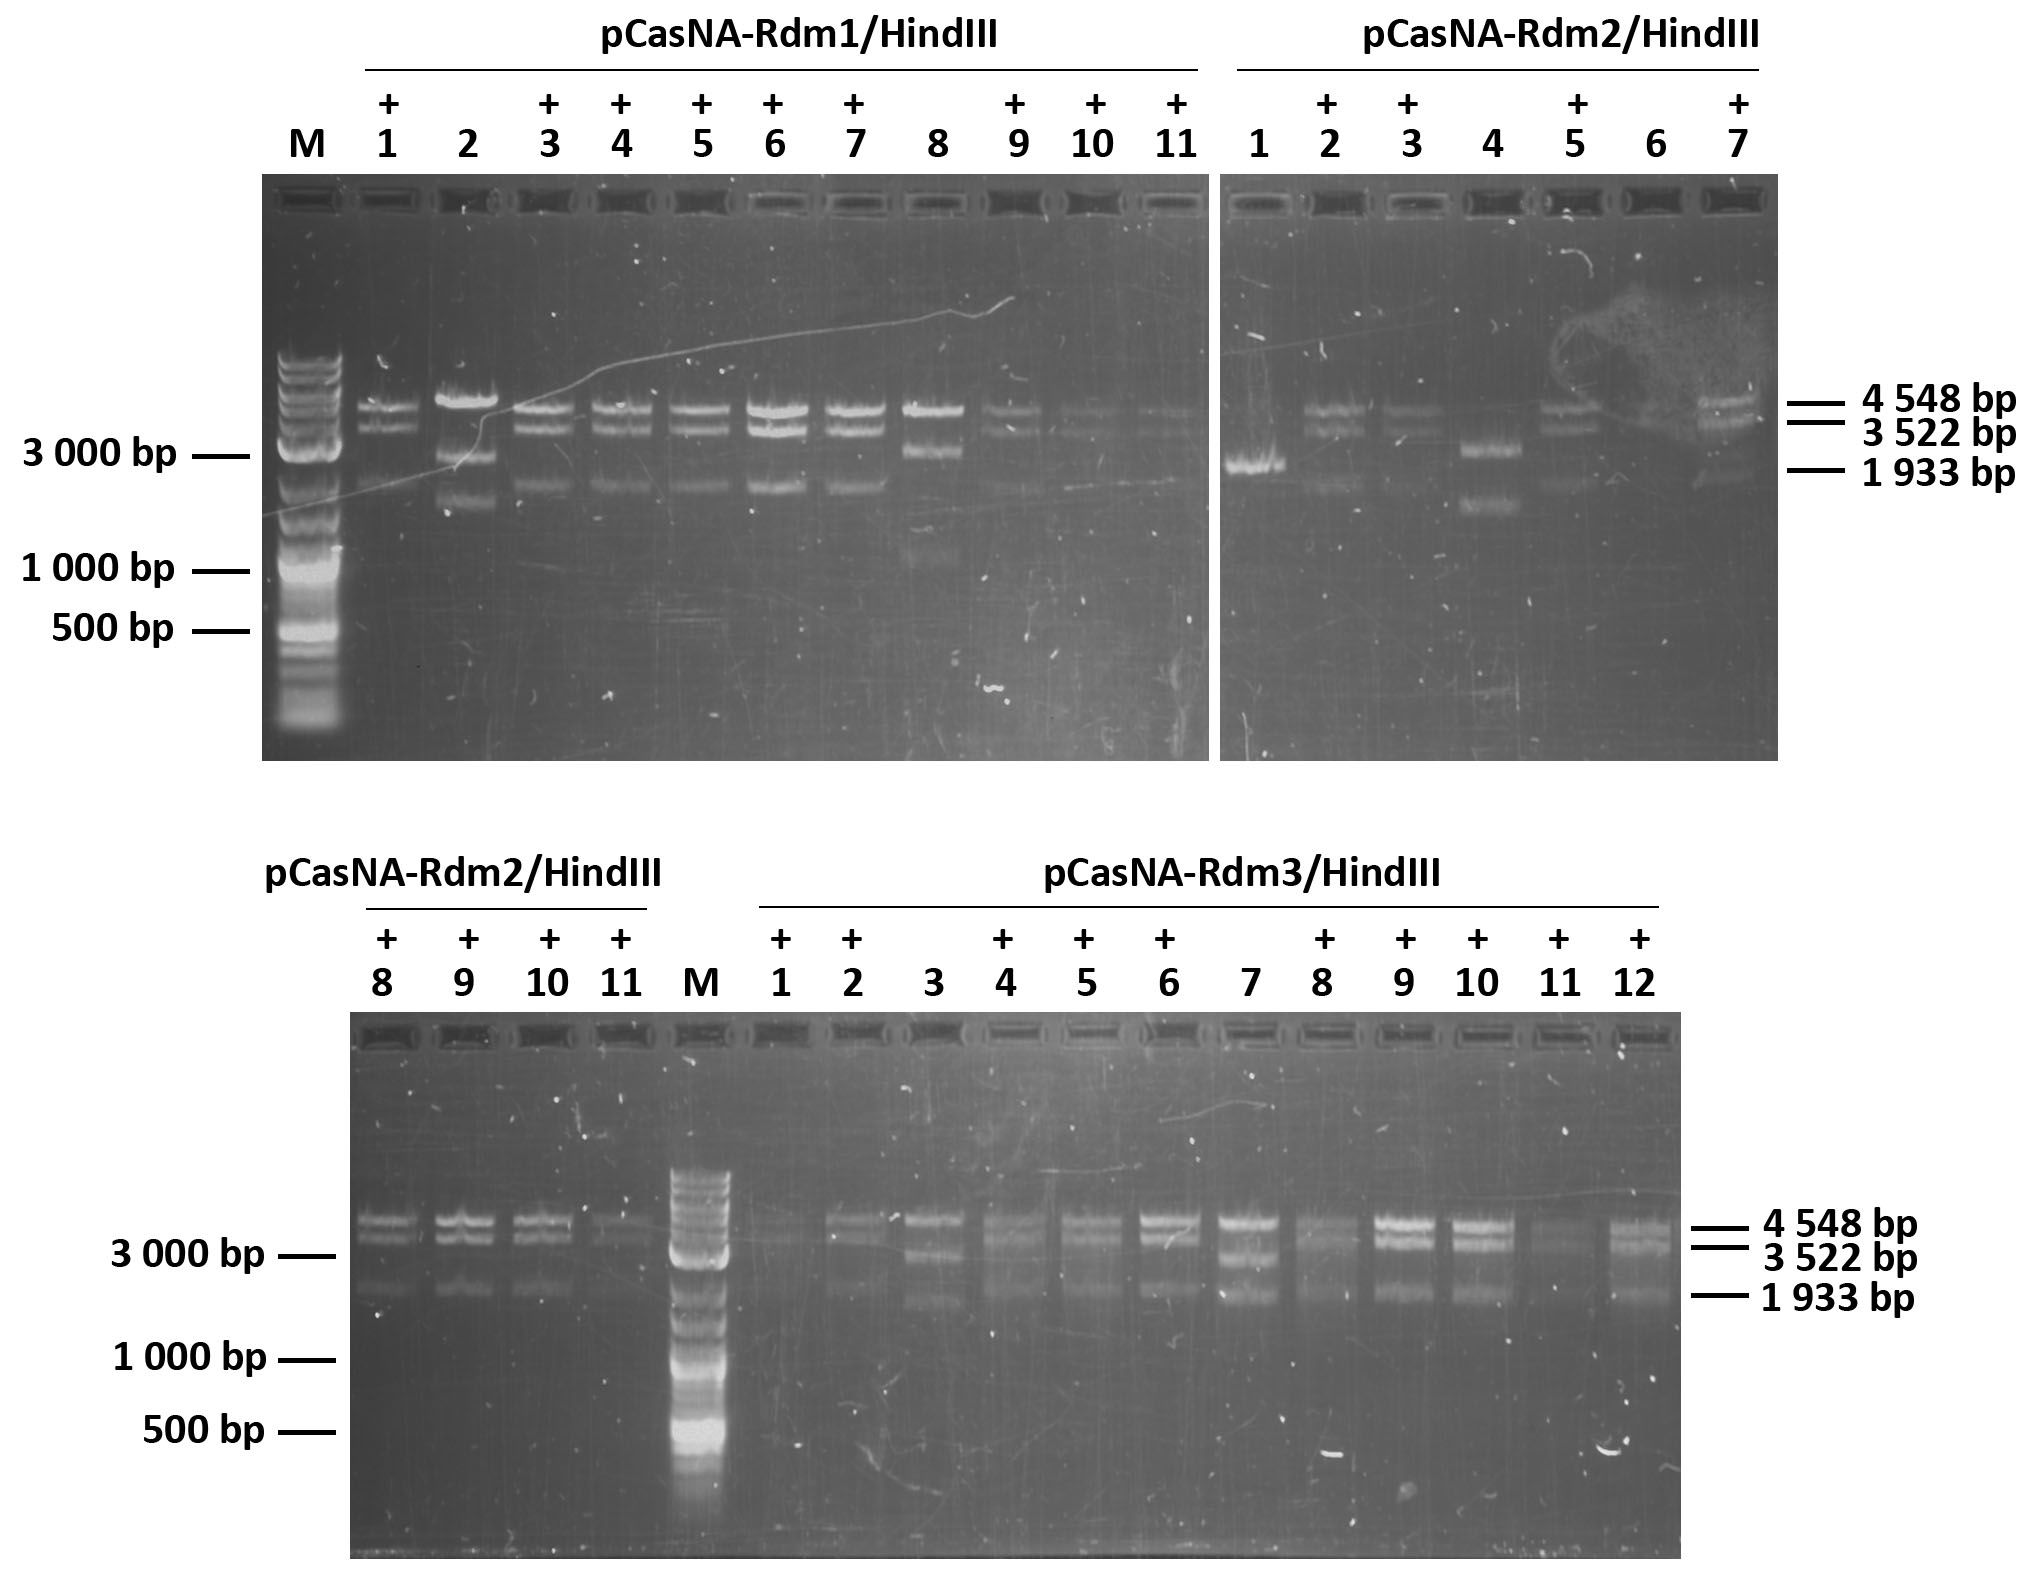


**Fig. S34** The restriction analysis of clones isolated from pCasNA-Rdm1, pCasNA-Rdm2 and pCasNA-Rdm3 assemblies using HindIII. The restriction fragments corresponding to pCasNA-Rdm1, pCasNA-Rdm2 and pCasNA-Rdm3 are shown on the right side. The major bands of the molecular weight marker NEB #B7025 (M) are shown on the left side. The correct assemblies are designated by pluses above the clone numbers.

**6.7 Assessing marker-freegene disruptions in *Y. lipolytica***

For assessing the efficiency of marker-free gene disruption we selected ARO8 and ARO9 as examples. For each gene, three alternative Cas9-helpers with different 20-base pair recognition sequences were constructed: pCasNA-ARO8a, pCasNA-ARO8c, pCasNA-ARO8i and pCasNA-ARO9a, pCasNA-ARO9i, pCasNA-ARO9k, respectively (Table S17). Two marker-free constructs for *ARO8* and *ARO9* gene disruption were assembled using overlap extension PCR (OE-PCR) with W29 *Y. lipolytica* genomic DNA as the template[1](#_ENREF_1). For *ARO8* gene, primers were 3204, 3205, 3206, and 3207 (Table S16). For *ARO9* gene primers were 3208, 3209, 3210, and 3211 (Table S16). Each construct represented a fusion of 500 bp of upstream and 500 bp of downstream homology regions flanking the corresponding gene. *Y. lipolytica* W29∆ura∆ku70 strain was co-transformed with each combination of marker-free construct (donor) and Cas9-helper (Cas9 and guide) according to procedures described in Section 2.2 of Supplementary Manual. Six large colonies from each transformation experiment were analysed by colony-PCR using primers pars 3212 and 3213 (for *ARO8* disruption) or 3214 and 3215 (for *ARO9* disruption). The fraction of clones with gene deletion was estimated for each Cas9-helper (Fig. S35), including pCasNA-ARO8a (4/6), pCasNA-ARO8c (6/6), pCasNA-ARO8i (5/6) and pCasNA-ARO9a (6/6), pCasNA-ARO9i (4/6), pCasNA-ARO9k (3/6), respectively, with overall efficiency of marker-free gene disruption 77,8% (28/36).


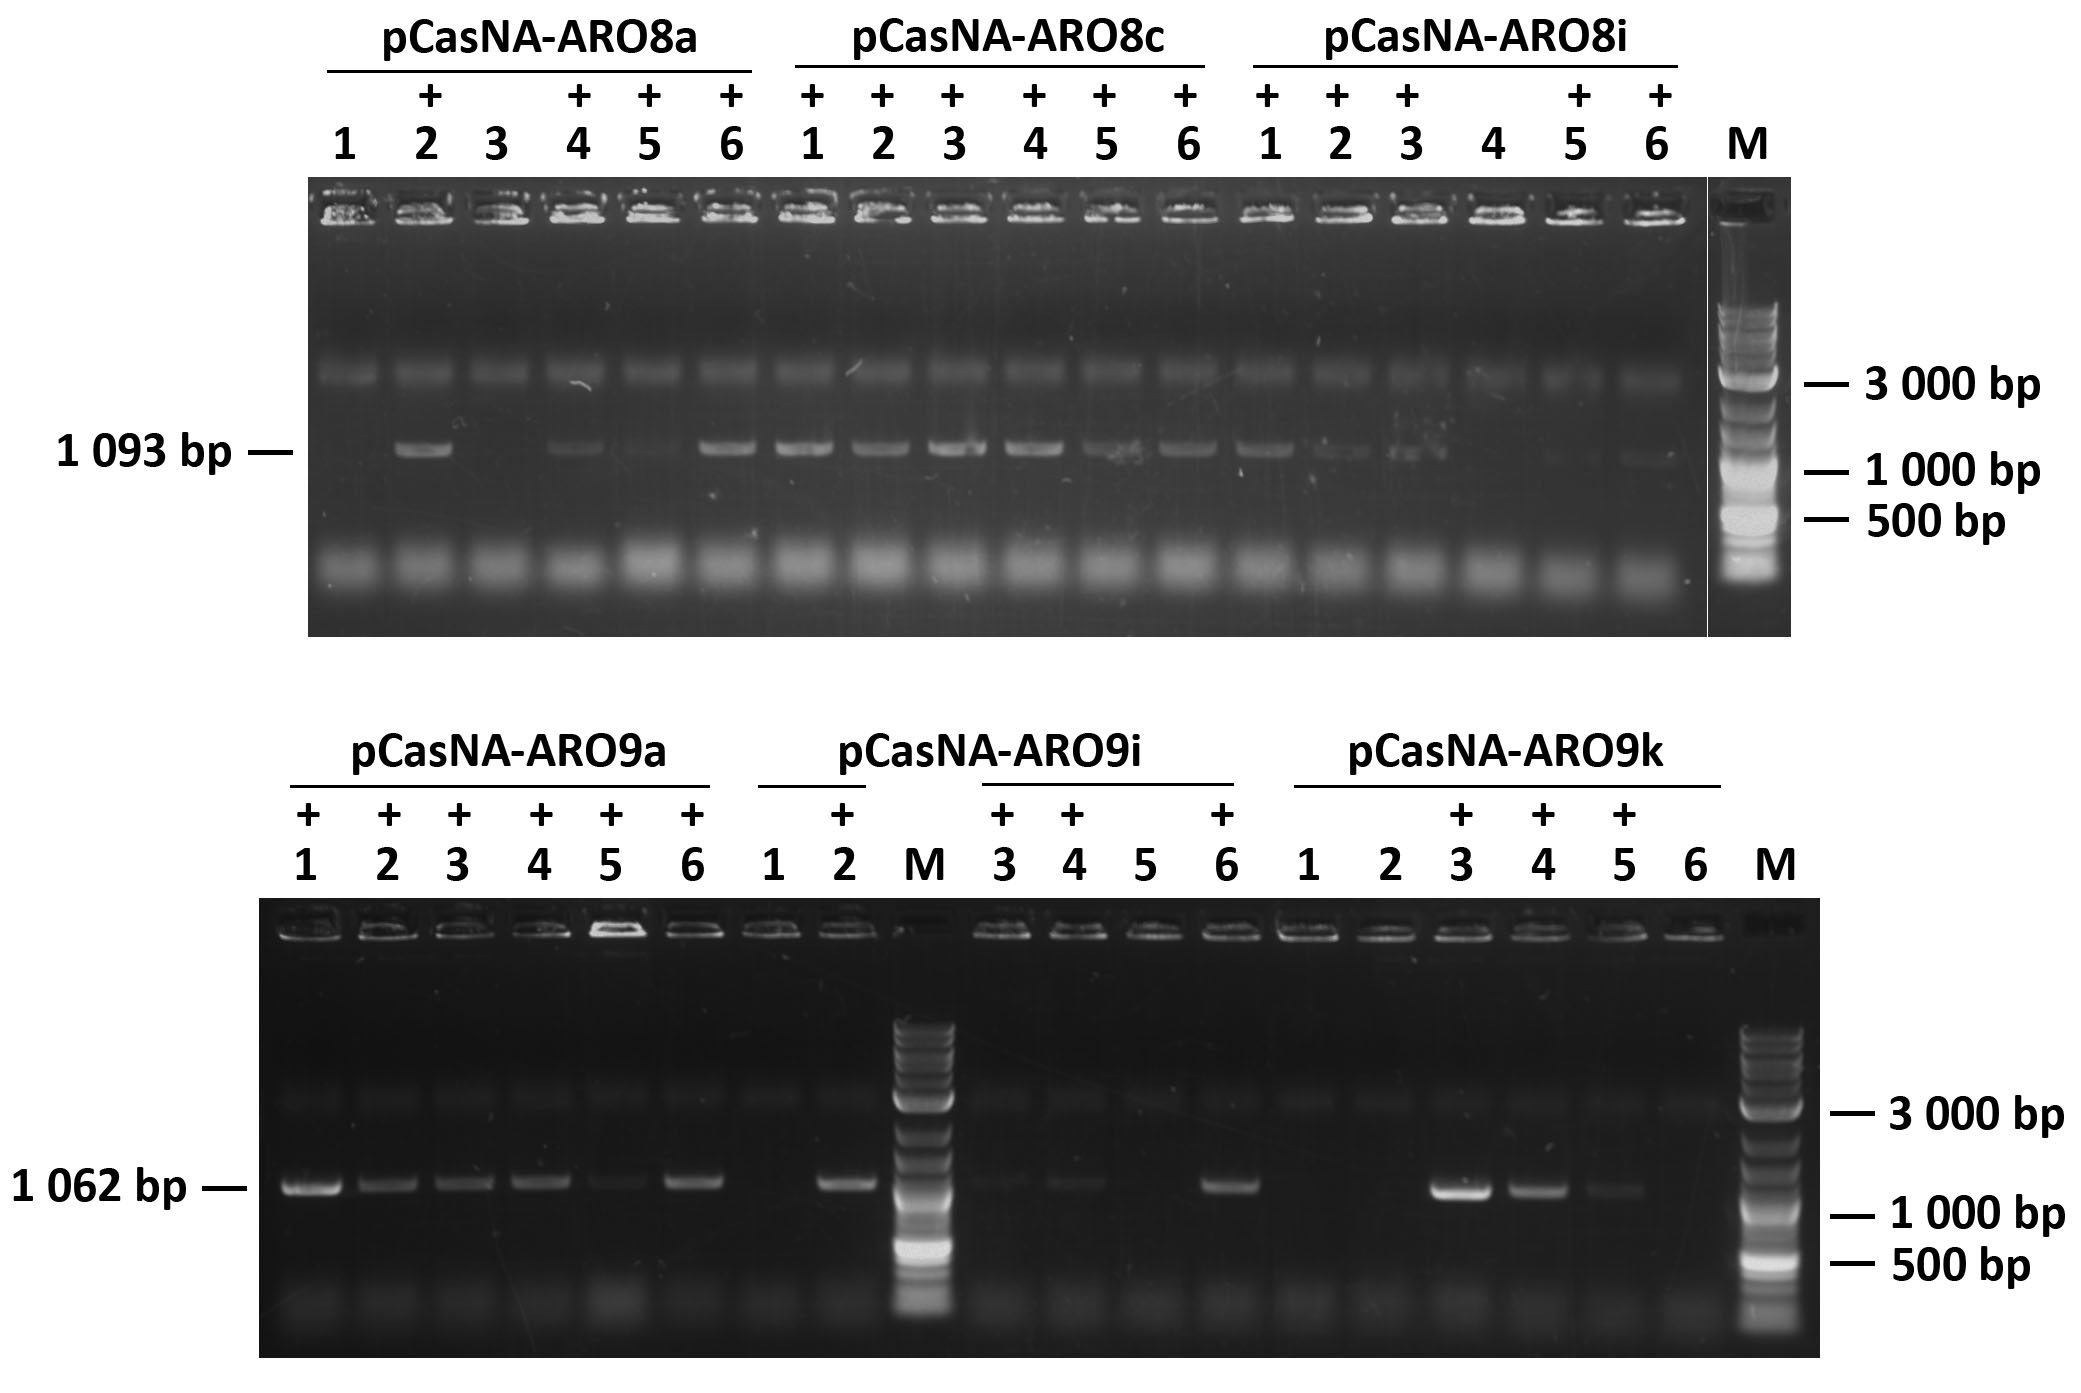


**Fig. S35** The colony-PCR of *Y. lipolytica* clones isolated after marker-free disruption of *ARO8* and *ARO9* genes. PCR fragments corresponding to deletions are shown on the left side. The major bands of the molecular weight marker NEB #B7025 (M) are shown on the right side. The correct transformants bearing required deletions are designated by pluses above the clone numbers.

**6.8 Assessing marker-freeintegration of overexpressing constructs in *Y. lipolytica***

For assessing marker free integration efficiency hrGFP was used as an example. Three marker-free constructs, pC2S1.1-hrGFP, pD12S1.1-hrGFP, and pE8S1.1-hrGFP, overexpressing *hrGFP* gene under control of *TEF1* promoter, were integrated into the genome of *Y. lipolytica* W29∆ura∆ku70 strain as described in Section 2.2 of Supplementary Manual. Among the selected clones, transformants were identified based on green fluorescence (Section 2.6 of Supplementary Manual). Correct integration among transformants with GFP-positive phenotype was confirmed using several clones with each construct (Fig. S36). As a result, the efficiency of marker-free vector integrations into IntC2, IntD12, and IntE8 loci was estimated as 44.4% (8/18), 88.9% (16/18), and 57.1% (8/14), respectively, with the overall value equal to 64% (32/50).


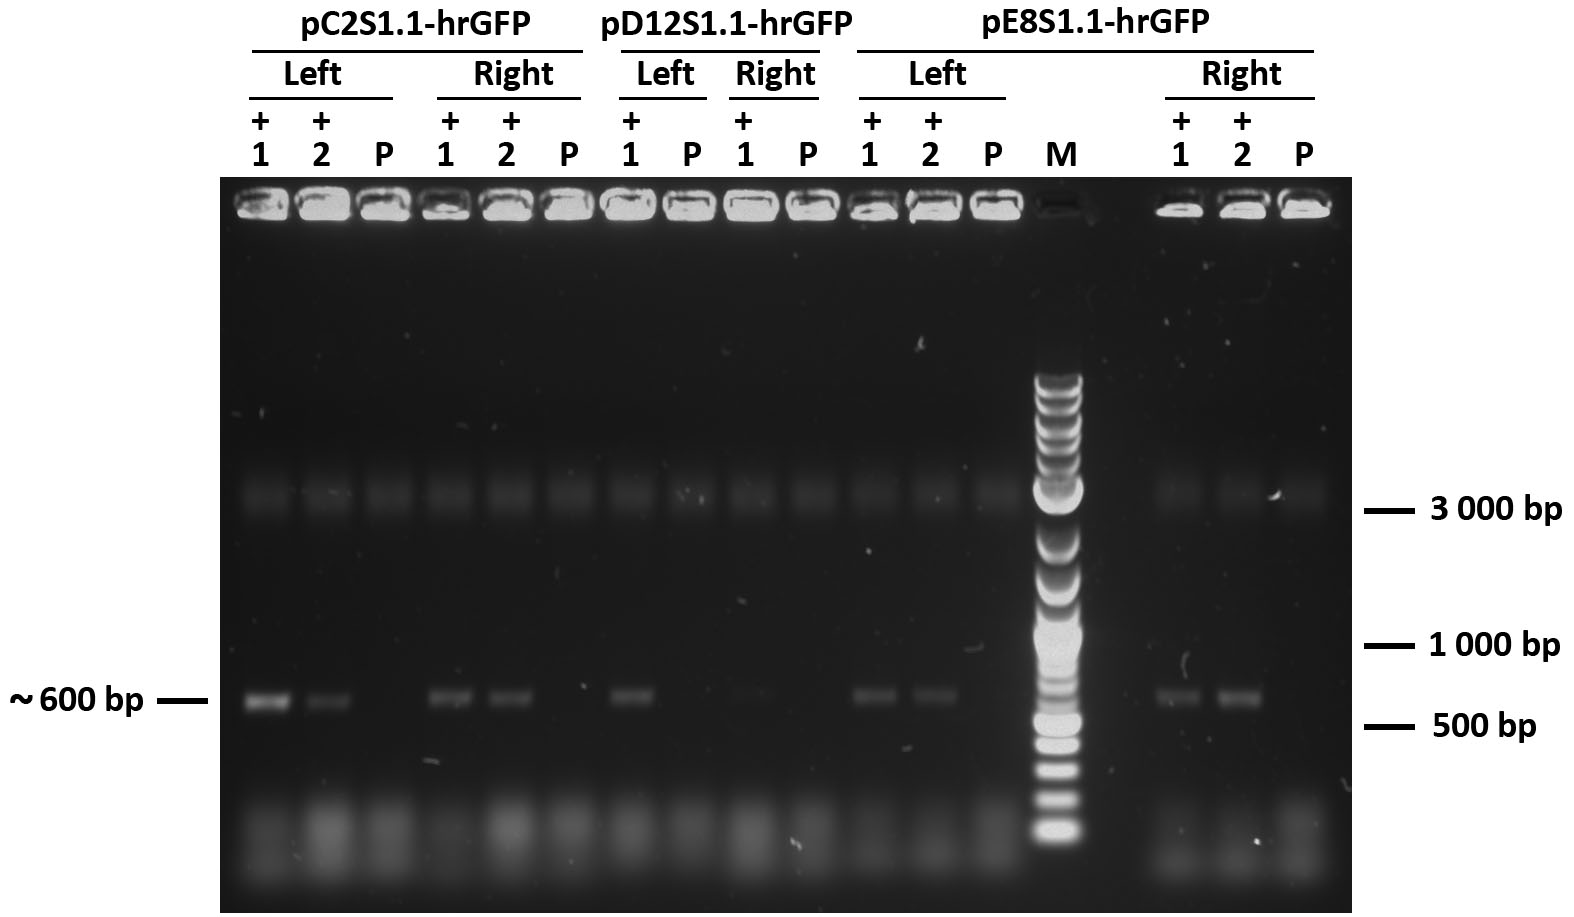


**Fig. S36** The colony-PCR of *Y. lipolytica* clones isolated after marker-free integration of pC2S1.1-hrGFP, pD12S1.1-hrGFP, and pE8S1.1-hrGFP constructs. Standard primers were used specific to both integration flanks (Tables S5 and S10). The PCR fragments corresponding to integration are as follows: IntC2 locus – 594 bp (left flank) and 601bp (right flank), IntD12 locus – 595bp (left flank) and 607bp (right flank), IntE8 locus – 589bp (left flank) and 597bp (right flank). Parent strain (P) was used as the negative control. The major bands of the molecular weight marker NEB #B7025 (M) are shown on the right side. The transformants with confirmed integration are designated with pluses above the clone numbers.

**7. METABOLIC ENGINEERING**

**7.1 Engineering strains of *Y. lipolytica* to produce** **HGA**

DNA assemblies of plasmid constructs required for metabolic engineering experiments are summarized in Table S17. A pedigree of strains constructed during the metabolic engineering experiment are provided in the flowchart in Figure S37.


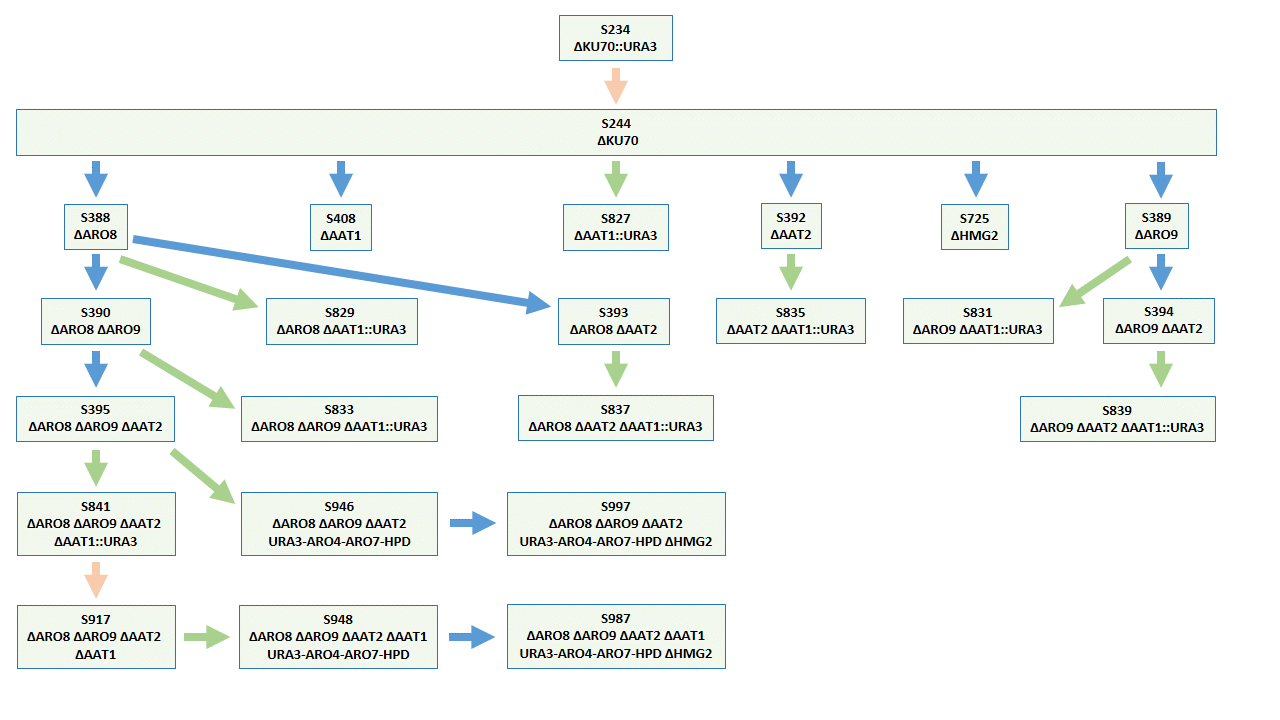


**Fig. S37** Pedigree flowchart of the metabolic engineering of HGA producing *Y. lipolytica* strains by combining marker-free and marker-based integration approaches. Blue arrows, marker-free integration steps. Green arrows, marker-based integration steps. Pink arrows, marker recovery steps. All strains contained disruption of *KU70* gene.

Marker-free disruption of *ARO8* and *ARO9* geneswas performed as described in Section 6.7. For *AAT2* gene deletion, the helper plasmid pCasNA-AAT2 was co-transformed with a marker-free disruption construct assembled by OE-PCR using primer set 3296, 3297, 3298, and 3299. Disruption of *AAT2* was verified by colony PCR using primers 3300 and 3301.

*AAT1* gene was disrupted using both marker-free and marker-based approaches. For the marker-free approach pCasNA-AAT1 helper was co-transformed with a marker-free disruption construct assembled by OE-PCR using primers set 3308, 3309, 3310, and 3311. The deletion was verified by colony PCR using primers 3312 and 3313. Since initial attempts to disrupt *AAT1* gene in S395 (*Δaro8Δaro9Δaat2*) using the marker-free approach were not successful, we directly compared integration efficiency between S395 and the parental strain S234. Both S395 and S234 were transformed in parallel with the same marker-free construct and pCasNA-AAT1 helper. 8 big colonies were tested from each experiment by colony PCR. None of the tested transformants of strain S395 showed *AAT1* deletions (0/8), while all derivatives of S234 contained the knockout (8/8).

A similar comparison was done using a marker-based approach. For marker-based *AAT1* gene disruption the construct pDelUK-AAT1 was integrated using procedure described in Section 2.3 of Supplementary Manual. Correct disruptions were verified by colony PCR using primers 3373 and Barcode1-R (Tables S10 and S16). Using this approach, we have isolated *AAT1* gene deletions in S395 with high efficiency (6/12). This suggested the convenience of using a selectable marker for the introduction of difficult modifications. Moreover, the appearance of transformants (Fig. S38) clearly demonstrated the detrimental phenotype of *Δaro8Δaro9Δaat2Δaat1::URA3* strains. Further comparative analysis using marker-based *AAT1* disruption in strains with different combinations of inactivated aminotransferases indicated that such a detrimental phenotype appeared in all experiments where the deletions of *AAT1* and *AAT2* genes were combined (Fig. S39).


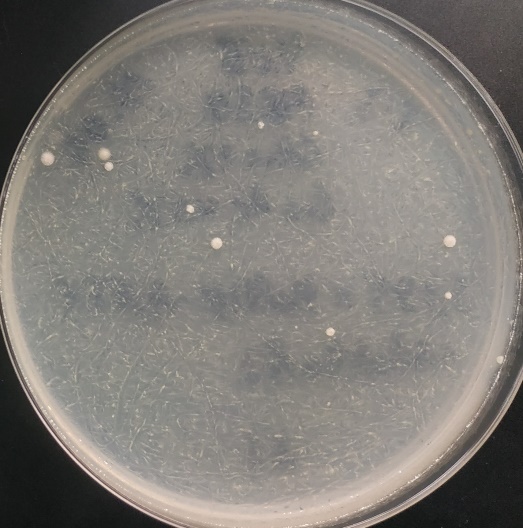

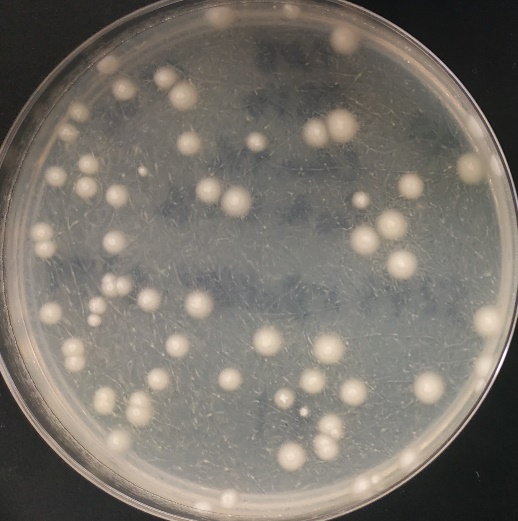


**Fig. S38** Detrimental phenotype of *AAT1* gene disruption in strain S395. Both S395 (left) and parental strain W29∆ura∆ku70 (right) were transformed with 500 ng of pDelUK-AAT1 construct under the similar conditions. Transformants were selected on synthetic complete medium (YNB with 1% glucose, 0.4% casamino acids, and 50mM phosphate buffer, pH6.8). Pictures were taken on 9th day of incubation at 30 ⁰C.


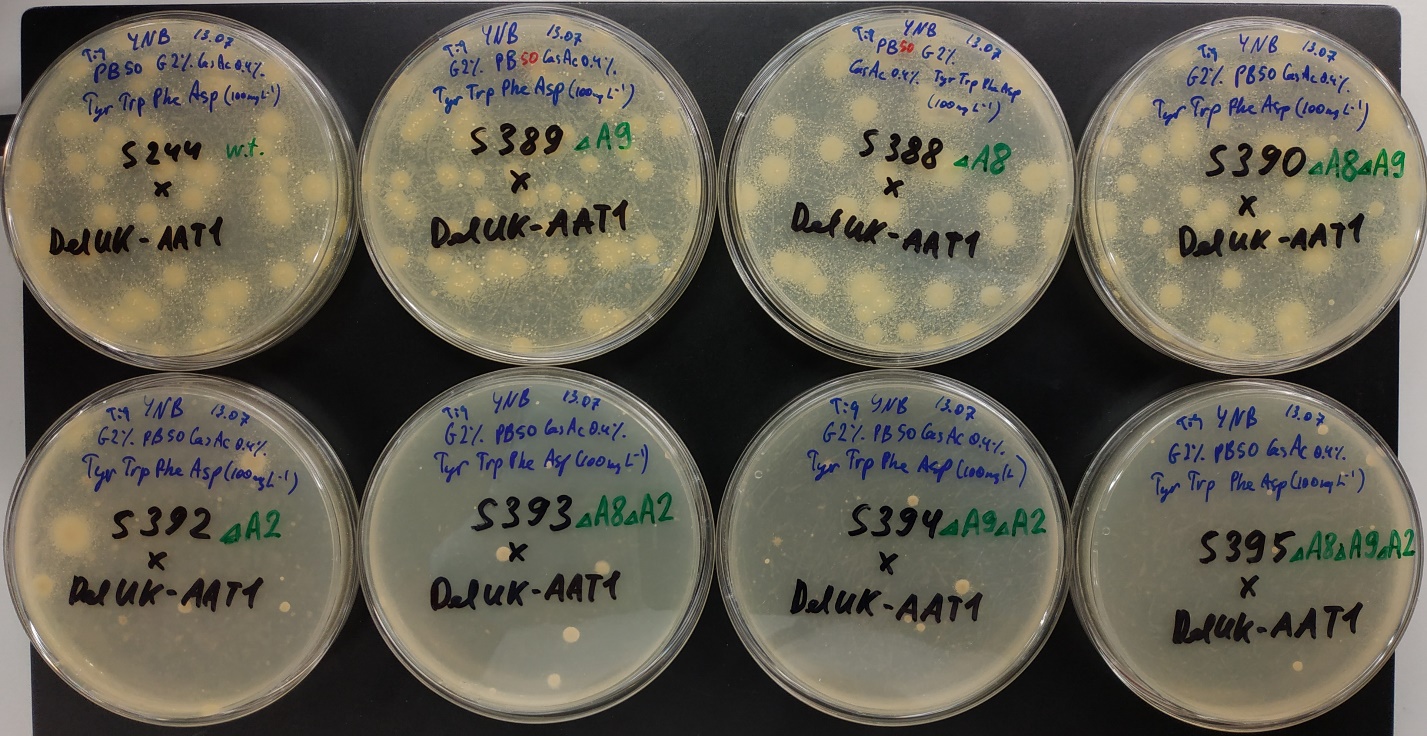


**Fig. S39** Detrimental phenotype of combined deletions of *AAT1* and *AAT2* genes. Seven strains with all possible combinations of three aminotransferases gene deletions (*i.e. ARO8, ARO9* and *AAT2*)and parental strain S244 (W29∆ura∆ku70) were transformed with 500 ng of linearized pDelUK-AAT1 under the similar conditions. Transformants were selected on synthetic complete medium (YNB with 2% glucose, 0.4% casamino acids, and 50mM phosphate buffer, pH6.8) with further addition of 100 mg/L of each L-tyrosine, L-tryptophan, L-phenylalanine, and L-aspartate. Plates were imaged after 11 days of incubation at 30 ⁰C. Detrimental phenotypes were observed in all experiments where recipients with *AAT2* gene disruption were used (bottom row of plates). To check genotypes, please see the pedigree flowchart (Fig. S37).

Then, the marker recovery protocol was applied to remove *URA3* gene from S841 resulting in strain S917 (Section 2.5 of Supplementary Manual). Attempts to transform both lineages (S395 and S917) with a marker-free construct overexpressing three genes (pE8S2.3-HPD-ARO4-ARO7) using pCasNA-IntE8 helper did not lead to observed integration, assessed via colony PCR with primers 3143 and 3171 on 15 transformants from each experiment. Similarly, no integration with the same constructs was observed when the parental strain S244 was used (0/15). To verify which gene among those overexpressed lead to the toxic effects halting transformant selection, three transcriptional units were transformed in S244 separately using marker-free constructs (pE8A1.1-HPD1, pE8A1.2-ARO4 and pE8A1.3-ARO7) targeted to the same IntE8 locus using pCasNA-IntE8 helper. Colony PCR revealed integration of two genes, *HPD1* (5/15) and *ARO7G141S* (7/15), while no correct integrations were observed for *ARO4K229L* (0/15).

To further assess the toxic effect of *ARO4K229L* allele, the random integration vector pZUS1.2-ARO4 was assembled and transformed in the recipient stain W29∆ura (Table S9), which retained functional NHEJ (Section 2.5 of Supplementary Manual). Random integration approaches frequently lead to integration of the vector parts instead of the whole sequence. Therefore, the obtained transformants could be a mixture of clones with either integration of the full-size vector overexpressing *ARO4K229L* or a fragment with the *URA3* marker only. Accordingly, after 11 days of incubation, two clearly distinguishable colony types of different size were observed (Fig. S40). Colony PCR with primers 3064 and 3066 showed that only the small colonies contained *ARO4K229L* gene, while larger colonies did not, therefore suggesting that overexpression of this gene reduced colony viability.


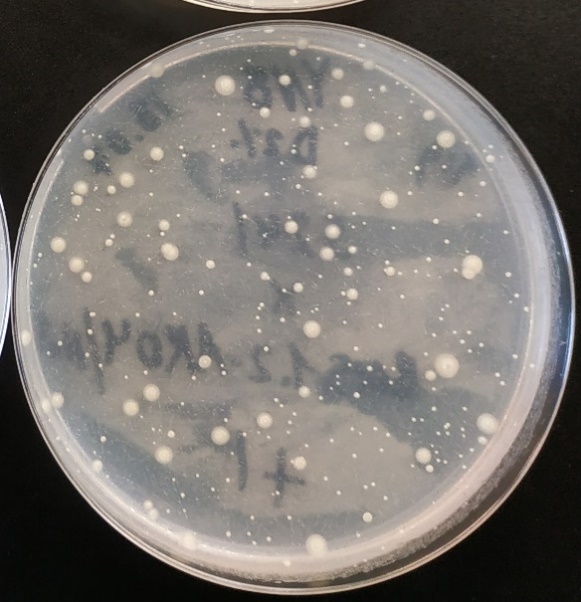


**Fig. S40** Detrimental phenotype of *ARO4K229L* overexpression. Plate contains transformants of W29∆ura strain with random integrating construct pZUS1.2-ARO4. Picture was taken after 11 days of incubation at 30 ⁰C on YNB medium with 2% glucose. Only small colonies contained *ARO4K229L* allele.

To assemble both detrimental modifications (namely, double deletion *Δaat2Δaat1* and *ARO4K229L* overexpression) in one strain we decided to combine both selection approaches, *e.g.* to stimulate integration of marker-based construct by inducing double-strand breaks in the target region via Cas9. Indeed, it has been shown that CRISPR/Cas9 assisted integration of marker-based construct yields a significantly higher integration frequency than with the same vector without Cas9 assistance[2](#_ENREF_2). Both strains, S395 with triple *(∆aro8∆aro9∆aat2*) and S917 with quadruple (*∆aro8∆aro9∆aat2∆aat1*) aminotransferase gene deletions were co-transformed by pE8US-HPD1-ARO4-ARO7 with pCasNA-IntE8 helper using a two-steps selection protocol (Section 2.4 of Supplementary Manual). Transformants were selected on YNB medium with 2% glucose, casamino acids (5 g/L) and 50mM phosphate buffer (pH6.8). After 10 days of incubation selected clones were analysed by colony PCR using standard primer sets for both flanks of IntE8 locus (Tables S10 and S16). Correct clones were restreaked to single colony on the same medium and presence of all three overexpressed genes, *i.e.* *HPD1*, *ARO4K229L*, and *ARO7G141S*, was confirmed by colony PCR using primer pairs 3064/3194, 3064/3066 and 3064/3390 respectively. As a result, strains S946 and S948 were obtained as derivatives of S395 and S917 (Fig. S37).

In the final step of engineering the HGA-producing strain, the gene *HMG2* was disrupted along with truncation of the telomeric region of chromosome D, as discussed below (Section 7.2). This truncation was induced by a pCasNA-HMG2 helper transformed without application of a donor molecule (Section 2.4 of Supplementary Manual). Positive transformants of strain lineages with three or four aminotransferase deletions, were recognized by a brown halo on YPD medium after 4 days of incubation resulting in derivatives designated as S997 and S987, respectively (Fig. S37).

To check HGA production, YNB media with 9% glucose was inoculated with each strain to an initial OD600 of 0.1 in 2.5mL of culture. Three strains were analysed, including both final strains (S997 and S987) and the wild type parent (S234) as the negative control. Cultivation was performed at high aeration rate (300 rpm) at 30⁰ C. After 14 days biomass was separated and HGA concentration was measured in the supernatant by UPLC/MS. The accumulation of HGA by the two engineered strains is summarized in Table S11.

**Table S11** HGA production by engineered *Y. lipolytica* strains.

| Strain number | Strain genotype | HGA production  (mg/L) | Standard deviation* |
| --- | --- | --- | --- |
| S234 | *∆ku70::URA3* | **0.0** | 0.0 |
| S987 | *∆ku70∆aro8∆aro9∆aat2∆aat1/↑HPD1↑ARO4↑ARO7/∆hmg2* | **339.1** | 11.6 |
| S997 | *∆ku70∆aro8∆aro9∆aat2/↑HPD1↑ARO4↑ARO7/∆hmg2* | **373.8** | 4.1 |

* – standard deviation was estimated based on two biological replicates

For visual screening of pyomelanin production in liquid media similar cultivation conditions were applied, with a different carbon source and cultivation time. In that case 2% of sodium citrate (pH7.0) was used instead of glucose, with cultivation terminated after 8 days.

**7.2 Discovery of *HMG2* gene and putative HGA degradation gene cluster in *Y. lipolytica***

Alignments of the amino acid sequence of homogentisate 1,2-dioxygenase of *Aspergillus fumigatus* (product of *hmgA*, GenBank XM_744461.1) revealed stretches of high similarity in a single region of chromosome D in *Y. lipolytica*. However, neither published genomic sequences of W29 strain (GenBank CP028451.1 and CP017556.1) revealed an intact open reading frame (ORF) in this region. Consequently, no locus tag was assigned in previous studies for this region during automated genome annotation[3](#_ENREF_3). Resequencing of this region in W29 strain revealed discrepancies with published sequences and allowed us to identify a new ORF that was designated as *HMG2* (GenBank accession number MZ387986). Analysis of the sequences around *HMG2* revealed two genes, which could be involved in the pathway of HGA degradation (Fig. S41). Upstream of *HMG2* lies an ORF (ORF2 on Fig. S41) encoding a protein with high level of similarity to a fumarylacetoacetate hydrolase from *A. fumigatus, fahA*. A third ORF next to these two (ORF3 on Fig. S41) encodes putative glutathione S-transferase, the enzyme family to which maleylacetoacetate isomerase encoded by *maiA* gene of *A. fumigatus* belongs. Notably, these three genes of *Y. lipolytica* are placed in the same order and orientation as the HGA-degradation cluster of *Aspergillus sp*[4](#_ENREF_4).


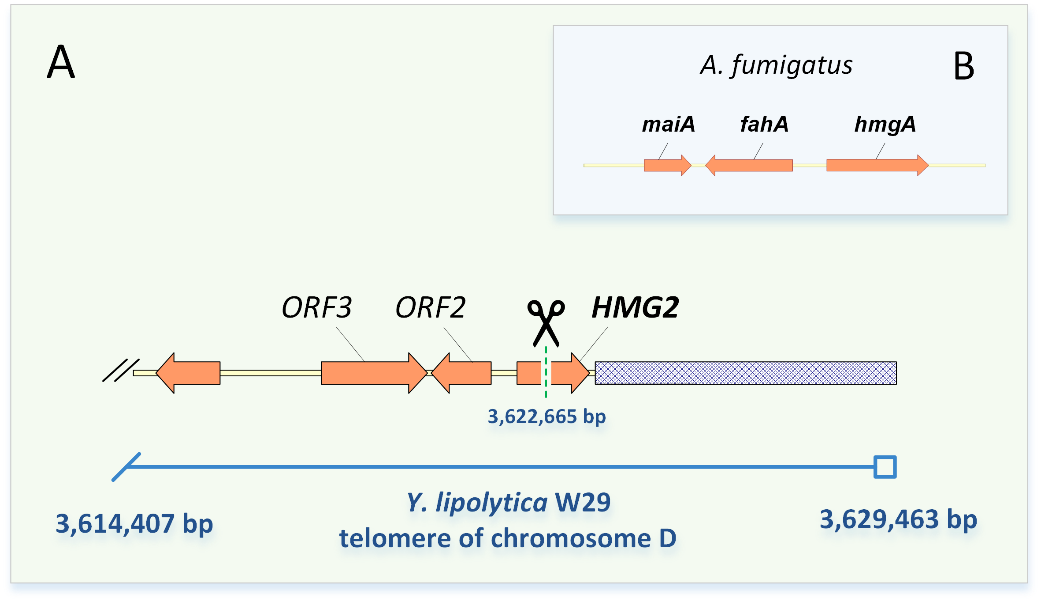


**Fig. S41** Putative HGA degradation cluster of *Y. lipolytica*. **A**, structure of the telomeric region of chromosome D of *Y. lipolytica* W29. The gene cluster includes *HMG2* (homogentisate 1,2-dioxygenase), *ORF2* is YALI1_D36215g (putative fumarylacetoacetate hydrolase), and *ORF3* YALI1_D36182g (putative maleylacetoacetate isomerase). Hatched box is a terminal non-unique sequence repeated in the W29 genome. Nucleotide numbering is shown according to the published W29 chromosome D sequence (GenBank CP017556.1). The position of Cas9 cut site is shown that leads to chromosome truncation as described in the text. **B**, structure of similar HGA degradation cluster in *A. fumigatus* (GenBank NC 007195.1).

To test the effect of *HMG2* disruption, we assembled pCasNA-HMG2 helper cutting within the coding sequence of this gene (Table S17). Since *HMG2* is the last unique sequence on the chromosome D, such a double-strand break will not affect the chromosome integrity if left unrepaired. Surprisingly, transformation of wild type background strain S244 with pCasNA-HMG2 resulted in numerous colonies secreting a brown pigment on YPD medium (Fig. S42). It is well known that pyomelanin is the product of self-oxidation and polymerization of HGA formed from aromatic amino acids[5](#_ENREF_5). At the same time, homogentisate 1,2-dioxygenase depletes HGA and, therefore its inactivation would facilitate pyomelanin formation. Therefore, this disruption enabled phenotype-based characterization of *HMG2* via visualisation of pyomelanin.


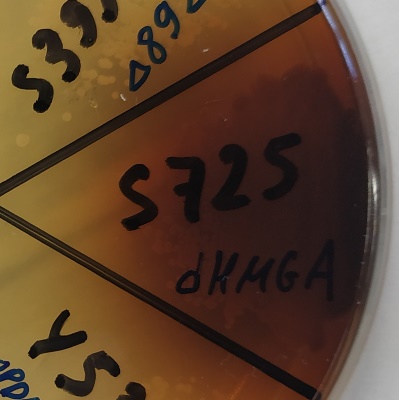


**Fig. S42** Bioconversion of aromatic amino acids from rich medium into pyomelanin by *Y. lipolytica* strain with disrupted *HMG2* gene. The strain S725 is S244 derivative with truncation of the telomere region of chromosome D induced by Cas9-helper cutting inside the *HMG2* gene.

We can speculate that the truncation of this telomeric region could occur spontaneously in nature. Any double-strand break arising in or upstream of *HMG2* would lead to the characteristic ‘brown’ phenotype. Due to its chromosomal location, the cell cycle can proceed without reparation of these double-strand breaks, which otherwise requires searching the broken DNA ends, bringing them together, and fixing the gap by one of the available reparation mechanisms. This would maintain viability of spontaneous *HMG2* mutants, increasing the frequency of their appearance. Indeed, researchers who work with *Y. lipolytica* often observe mutants accumulating brown pigment on rich media[6](#_ENREF_6), [7](#_ENREF_7). It is noteworthy to mention that the HGA degradation cluster is absent in sequenced genomes of *Y. lipolytica* strains CLIB122 and WSH-Z06, while present in H222 and IBT446. Interestingly, spontaneous pyomelanin accumulation by *Y. lipolytica* induces deep brown coloration of some ripened cheeses (*e.g.* Gorgonzola and Camembert) which leads to significant losses in manufacture[8](#_ENREF_8), [9](#_ENREF_9). Therefore, a potential application of this finding might be the creation of *Y. lipolytica* strains with a more stable chromosomal location of the HGA degradation gene cluster.

**8. PROMOTER LIBRARY SCREENING IN *Y. LIPOLYTICA***

**8.1 Natural promoter libraries**

Ideally, toolkits intended for the assembly of multiple transcription units should avoiding using repetitive sequences. Application of the same promoter in different positions leads to formation of direct repeats. Recombination between such promoters can induce of the removal of coding sequences locating between them and lead to instability of integrated constructs. To make systems more robust; which is essential for industrial applications; different promoters should be preferentially be made available. This is especially true for strong constitutive promoters, which are often limited, while also used very frequently, such as promoters of *Y. lipolytica* gene *TEF1*.

As a potential source of promoters with strong constitutive expression we selected genes encoding proteins of ribosomes. Studies on *S. cerevisiae* have shown that 50% of the transcripts produced by RNA polymerase II are devoted to the pool of ribosomal proteins[10](#_ENREF_10), while their promoters are among the strongest during exponential growth phase[11](#_ENREF_11). Therefore, as the source of promoters for the libraries, we selected *Y. lipolytica* genes encoding proteins of small (40S) and large (60S) ribosomal subunits. Commercial synthesis of seven (namely, promoters *RPL5, RPL16, RPL28, RPS5, RPS7, RPS14,* and *RPS30*) was not possible due to complexity of secondary structure and widely distributed homopolymers. As a result, promoters of 26 genes encoding proteins of the small and 38 genes of the large subunit were chosen to test. Besides, we have selected 29 promoters of different origins including one from human cytomegalovirus (*hCMV*) and 28 from *Y. lipolytica*. Among those were genes encoding key metabolic reactions and different house-keeping genes supposed to be highly active in various media and growth conditions. Altogether, three libraries comprised 93 natural promoters that were synthesized and assembled on an empty pProUA-mScarlet vector (Supplementary GenBank files) (Section 1.8 of Supplementary Manual). To make promoters compatible with other modules of the toolkit, we introduced a limited number of point mutations (no more than 4 per promoter) in order to eliminate forbidden recognition sequences (Table S3 of Supplementary Manual).

All obtained pProUA-series plasmids along with *TEF1* promoter (pProUA-TEF1) as a positive control were linearized by MssI and co-transformed with pCasNA-IntC2 helper into the strain S244 (W29∆ura∆ku70) using the procedure described in Section 2.6 of Supplementary Manual. For each construction two independent transformants were isolated and analysed for GFP activity. The parental strain S234 (W29∆ku70ura+) was used as a negative control. The selected strains were first cultivated overnight (16 h) in 2 mL YPD. The biomass was precipitated at 4 ⁰C, washed with saline solution and resuspended to get OD600 10.0. At this step, the activities of the different promoters could be visually compared using blue LED transilluminator (*e.g.* DR46B, Clare Chemical Research) with orange filter (Fig. S43).


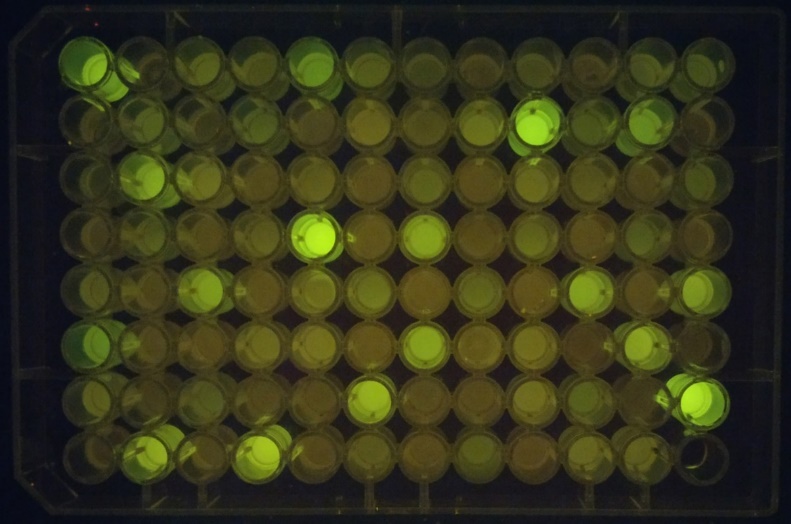
**
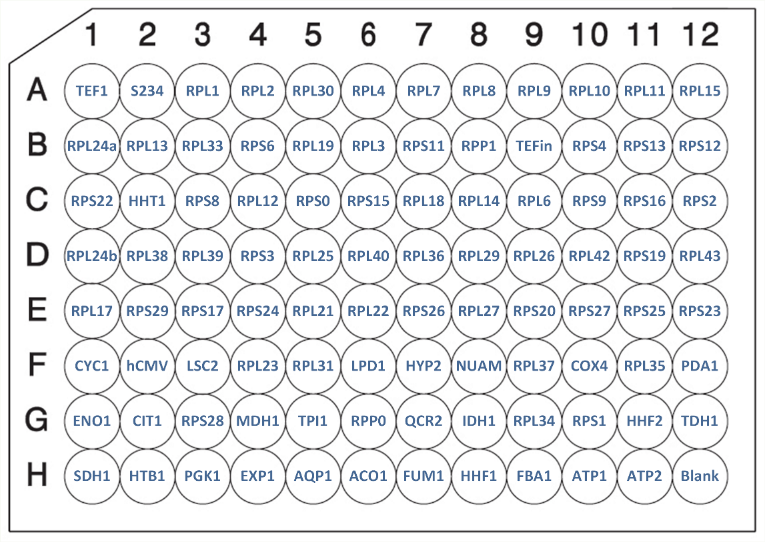
**

**Fig. S43** Visual screening of promoter libraries integrated in *Y. lipolytica* genome using CRISPR/Cas9. Left, three libraries of native promoters were combined in 96-well plate. Single transformant represents each of 96 tested promoters. Right, plate map shown with gene names that were used as the source of the promoters.

Such suspensions were diluted with the same volume of 16% DMSO solution to an OD600 5.0. Then, samples were aliquoted by 10 µL and stored at -80 ⁰C. For fluorescence measurement these aliquots were defrosted and used to inoculate 2 mL of YPD and YNB media with 2% glucose to a starting OD600 of 0.025. Cells were grown at 30 ⁰C with shaking (250 rpm) until exponential growth phase, which corresponded to 16th and 24th hours of incubation for YPD and YNBD, respectively. Obtained cultures were washed and resuspended in the same volume of saline solution. 200 µl of each suspension were transferred into black-walled 96-well plates with flat transparent bottom (665096 Greiner Bio-One) and green fluorescence (excitation, 495 nm; emission, 535 nm) along with OD600 were measured using luminometer CLARIOstar Plus (BMG Labtech). The gain of the photomultiplier was automatically controlled by enhanced dynamic range function. Measured values were normalized for 1 s accumulation time. Acquired data were analysed using MARS software (BMG Labtech). All fluorescence and OD600 data were automatically blanked using the reference well with the saline solution. Relative fluorescence (*RF*) for each well was calculated by dividing fluorescence on *OD600*. Promoter strength (*Px*) was calculated using the following equation:

, where *RFPx*, *RFTEF1*, and *RFParent* are relative fluorescences of strains with promoters *Px*, *TEF1* and the parent strain S234, respectively.

As a result, the autofluorescence of the parent strain S234 (without GFP) was taken as the baseline (0%), while the strength of all promoters was normalized on the *TEF1* activity corresponding to 100%. Overall, during three independent experiments 93 native promoters were functionally characterized (Tables S12, S13, and S14).

**Table S12** Measured strength of 26 promoters of *Y. lipolytica* genes encoding 40S ribosomal proteins

| **Promoter** | **Source gene** | **Locus tag** | **Supposed function**  **of gene product** | **Donor plasmid** | **Promoter strength (%)*** | | | |
| --- | --- | --- | --- | --- | --- | --- | --- | --- |
| **YPD mean** | **YPD**  **SD** | **YNBD**  **mean** | **YNBD**  **SD** |
| **Parent S234** |  |  |  |  | 0,0 | 0,11 | 0,0 | 0,54 |
| **RPS15** | *Y. lipolytica RPS15* | YALI1_F08635g | Ribosomal 40S subunit protein S15 | pProUA-RPS15 | 0,7 | 0,51 | 1,32 | 0,02 |
| **RPS26** | *Y. lipolytica RPS26* | YALI1_E23610g | Ribosomal 40S subunit protein S26 | pProUA-RPS26 | 1,3 | 0,35 | 1,79 | 0,44 |
| **RPS24** | *Y. lipolytica RPS24* | YALI1_F32659g | Ribosomal 40S subunit protein S24B | PproUA-RPS24 | 1,2 | 0,44 | 1,96 | 0,65 |
| **RPS20** | *Y. lipolytica RPS20* | YALI1_E24442g | Ribosomal 40S subunit protein S20 | pProUA-RPS20 | 2,1 | 0,37 | 2,38 | 1,02 |
| **RPS25** | *Y. lipolytica RPS25* | YALI1_C05133g | Ribosomal 40S subunit protein S25 | pProUA-RPS25 | 1,7 | 0,64 | 3,59 | 0,98 |
| **RPS29** | *Y. lipolytica RPS29* | YALI1_B11788g | Ribosomal 40S subunit protein S29 | pProUA-RPS29 | 2,6 | 1,31 | 3,81 | 0,95 |
| **RPS16** | *Y. lipolytica RPS16* | YALI1_B17008g | Ribosomal 40S subunit protein S16 | pProUA-RPS16 | 4,8 | 2,2 | 5,1 | 0,2 |
| **RPS12** | *Y. lipolytica RPS12* | YALI1_F09230g | Ribosomal 40S subunit protein S12 | pProUA-RPS12 | 2,1 | 0,12 | 6,28 | 0,98 |
| **RPS22** | *Y. lipolytica RPS22* | YALI1_D07348g | Ribosomal 40S subunit protein S24A | PproUA-RPS22 | 7,02 | 2,3 | 8,04 | 0,71 |
| **RPS11** | *Y. lipolytica RPS11* | YALI1_F27175g | Ribosomal 40S subunit protein S11 | pProUA-RPS11 | 9,7 | 1,23 | 12,47 | 5,54 |
| **RPS3** | *Y. lipolytica RPS3* | YALI1_E28033g | Ribosomal 40S subunit protein S3 | pProUA-RPS3 | 16,4 | 0,1 | 13,14 | 3,08 |
| **RPS8** | *Y. lipolytica RPS8* | YALI1_F32305g | Ribosomal 40S subunit protein S8 | pProUA-RPS8 | 22,5 | 1,3 | 19,39 | 1,21 |
| **RPS9** | *Y. lipolytica RPS9* | YALI1_F08284g | Ribosomal 40S subunit protein S9 | pProUA-RPS9 | 26,6 | 1,72 | 19,4 | 2,61 |
| **RPS0** | *Y. lipolytica RPS0* | YALI1_A18557g | Ribosomal 40S subunit protein S0 | pProUA-RPS0 | 15,4 | 0,6 | 20,76 | 0,73 |
| **RPS4** | *Y. lipolytica RPS4* | YALI1_D16029g | Ribosomal 40S subunit protein S4 | pProUA-RPS4 | 28,5 | 0,3 | 21,16 | 4,33 |
| **RPS2** | *Y. lipolytica RPS2* | YALI1_E17466g | Ribosomal 40S subunit protein S2 | pProUA-RPS2 | 30,4 | 0,2 | 22,05 | 3,63 |
| **RPS19** | *Y. lipolytica RPS19* | YALI1_B26808g | Ribosomal 40S subunit protein S19 | pProUA-RPS19 | 27,2 | 0,31 | 22,96 | 1,2 |
| **RPS28** | *Y. lipolytica RPS28* | YALI1_C06597g | Ribosomal 40S subunit protein S28 | pProUA-RPS28 | 28,4 | 0,14 | 23,01 | 4,26 |
| **RPP1** | *Y. lipolytica RPP1* | YALI1_B16968g | 60S acidic ribosomal protein P1 | pProUA-RPP1 | 25,9 | 0,5 | 23,3 | 4,89 |
| **RPS1** | *Y. lipolytica RPS1* | YALI1_F08431g | Ribosomal 40S subunit protein S1 | pProUA-RPS1 | 25,8 | 2,7 | 29,68 | 2,18 |
| **RPS6** | *Y. lipolytica RPS6* | YALI1_F25001g | Ribosomal 40S subunit protein S6 | pProUA-RPS6 | 32,1 | 0,6 | 30,09 | 0,24 |
| **RPS13** | *Y. lipolytica RPS13* | YALI1_F14712g | Ribosomal 40S subunit protein S13 | pProUA-RPS13 | 47,4 | 4,6 | 33,8 | 3,9 |
| **RPS17** | *Y. lipolytica RPS17* | YALI1_F19249g | Ribosomal 40S subunit protein S17 | pProUA-RPS17 | 42,9 | 5,66 | 34,24 | 1,53 |
| **RPS23** | *Y. lipolytica RPS23* | YALI1_A21775g | Ribosomal 40S subunit protein S23 | pProUA-RPS23 | 45,4 | 6,56 | 35,06 | 1,58 |
| **RPS27** | *Y. lipolytica RPS27* | YALI1_E41367g | Ribosomal 40S subunit protein S27 | pProUA-RPS27 | 45,1 | 5 | 39,07 | 2,31 |
| **RPP0** | *Y. lipolytica RPP0* | YALI1_B18707g | Ribosomal protein P0 | pProUA-RPP0 | 40,6 | 5,6 | 41,85 | 4,68 |
| **TEF1** | *Y. lipolytica TEF1* | YALI1_C12642g | Translational elongation factor EF-1 alpha | pProUA-TEF1 | 100 | 2,33 | 100 | 2,89 |

* - Standard deviation was calculated based on two replicates using independent transformants. Promoter strengths were sorted from weak to strong based on the results obtained in the minimal YNBD medium.

**Table S13** Measured strength of 38 promoters of *Y. lipolytica* genes encoding 60S ribosomal proteins

| **Promoter** | **Source gene** | **Locus tag** | **Supposed function**  **of gene product** | **Donor plasmid** | **Promoter strength (%)** | | | |
| --- | --- | --- | --- | --- | --- | --- | --- | --- |
| **YPD mean** | **YPD**  **SD** | **YNBD**  **mean** | **YNBD**  **SD** |
| **Parent S234** |  |  |  |  | 0,0 | 0,4 | 0,0 | 0,33 |
| **RPL42** | *Y. lipolytica RPL42* | YALI1_B05646g | Ribosomal 60S subunit protein L42 | pProUA-RPL42 | 1,3 | 1,3 | 1,95 | 0,16 |
| **RPL10** | *Y. lipolytica RPL10* | YALI1_D16249g | Ribosomal 60S subunit protein L10 | pProUA-RPL10 | 3,5 | 0 | 2,05 | 0,27 |
| **RPL8** | *Y. lipolytica RPL8* | YALI1_F32043g | Ribosomal 60S subunit protein L8 | pProUA-RPL8 | 2,4 | 0,9 | 3,37 | 0,45 |
| **RPL39** | *Y. lipolytica RPL39* | YALI1_D07338g | Ribosomal 60S subunit protein L39 | pProUA-RPL39 | 1,1 | 0,3 | 3,85 | 0,21 |
| **RPL43** | *Y. lipolytica RPL43* | YALI1_E41061g | Ribosomal 60S subunit protein L43 | pProUA-RPL43 | 3,8 | 1,7 | 5,29 | 0,75 |
| **RPL40** | *Y. lipolytica RPL40* | YALI1_F12190g | Ribosomal 60S subunit protein L40 | pProUA-RPL40 | 7,7 | 3,4 | 5,52 | 1,36 |
| **RPL24A** | *Y. lipolytica RPL24A* | YALI1_E27880g | Ribosomal 60S subunit protein L24A | pProUA-RPL24A | 4 | 2,1 | 6,07 | 0,51 |
| **RPL19** | *Y. lipolytica RPL19* | YALI1_E29930g | Ribosomal 60S subunit protein L19 | pProUA-RPL19 | 5,2 | 0,5 | 6,17 | 0,47 |
| **RPL14** | *Y. lipolytica RPL14* | YALI1_E00928g | Ribosomal 60S subunit protein L14 | pProUA-RPL14 | 4,1 | 0,9 | 6,49 | 1,02 |
| **RPL24B** | *Y. lipolytica RPL24B* | YALI1_B13137g | Ribosomal 60S subunit protein L24B | pProUA-RPL24B | 4,4 | 0,4 | 6,83 | 2,19 |
| **RPL33** | *Y. lipolytica RPL33* | YALI1_E37930g | Ribosomal 60S subunit protein L33 | pProUA-RPL33 | 8,8 | 3,6 | 7,7 | 1,43 |
| **RPL29** | *Y. lipolytica RPL29* | YALI1_F11855g | Ribosomal 60S subunit protein L29 | pProUA-RPL29 | 12,5 | 0,2 | 12,94 | 1,47 |
| **RPL9** | *Y. lipolytica RPL9* | YALI1_E34344g | Ribosomal 60S subunit protein L9 | pProUA-RPL9 | 19 | 3,8 | 12,47 | 0,6 |
| **RPL6** | *Y. lipolytica RPL6* | YALI1_E32842g | Ribosomal 60S subunit protein L6 | pProUA-RPL6 | 21,3 | 1,8 | 15,85 | 2,84 |
| **RPL11** | *Y. lipolytica RPL11* | YALI1_B19897g | Ribosomal 60S subunit protein L11 | pProUA-RPL11 | 24 | 3,4 | 16,38 | 4,77 |
| **RPL4** | *Y. lipolytica RPL4* | YALI1_C09094g | Ribosomal 60S subunit protein L4 | pProUA-RPL4 | 27,3 | 0,2 | 17,08 | 0,33 |
| **RPL17** | *Y. lipolytica RPL17* | YALI1_C22922g | Ribosomal 60S subunit protein L17 | pProUA-RPL17 | 22,7 | 2,7 | 17,1 | 3,9 |
| **RPL31** | *Y. lipolytica RPL31* | YALI1_E29150g | Ribosomal 60S subunit protein L31 | pProUA-RPL31 | 21,4 | 3,6 | 17,11 | 7,36 |
| **RPL13** | *Y. lipolytica RPL13* | YALI1_B16996g | Ribosomal 60S subunit protein L13 | pProUA-RPL13 | 26,3 | 1,7 | 18,07 | 3,45 |
| **RPL2** | *Y. lipolytica RPL2* | YALI1_F32090g | Ribosomal 60S subunit protein L2 | pProUA-RPL2 | 21,4 | 4,1 | 19,64 | 2,67 |
| **RPL1** | *Y. lipolytica RPL1* | YALI1_E37886g | Ribosomal 60S subunit protein L1 | pProUA-RPL1 | 28,9 | 3,2 | 20,05 | 3,93 |
| **RPL15** | *Y. lipolytica RPL15* | YALI1_D32153g | Ribosomal 60S subunit protein L15 | pProUA-RPL15 | 29,5 | 2,4 | 20,37 | 2 |
| **RPL22** | *Y. lipolytica RPL22* | YALI1_E38178g | Ribosomal 60S subunit protein L22 | pProUA-RPL22 | 32,6 | 3,8 | 20,42 | 4,34 |
| **RPL37** | *Y. lipolytica RPL37* | YALI1_F39051g | Ribosomal 60S subunit protein L37 | pProUA-RPL37 | 20,9 | 1,6 | 21 | 2,26 |
| **RPL34** | *Y. lipolytica RPL34* | YALI1_C06511g | Ribosomal 60S subunit protein L34 | pProUA-RPL34 | 23,6 | 7,3 | 21,34 | 5,2 |
| **RPL18** | *Y. lipolytica RPL18* | YALI1_B11934g | Ribosomal 60S subunit protein L18 | pProUA-RPL18 | 30,8 | 1,5 | 21,59 | 1 |
| **RPL23** | *Y. lipolytica RPL23* | YALI1_D12930g | Ribosomal 60S subunit protein L23 | pProUA-RPL23 | 20,1 | 0,1 | 22,22 | 2,38 |
| **RPL3** | *Y. lipolytica RPL3* | YALI1_C29810g | Ribosomal 60S subunit protein L3 | pProUA-RPL3 | 21,8 | 1,6 | 22,46 | 2,1 |
| **RPL27** | *Y. lipolytica RPL27* | YALI1_B07937g | Ribosomal 60S subunit protein L27 | pProUA-RPL27 | 35,6 | 2,8 | 22,59 | 0,75 |
| **RPL21** | *Y. lipolytica RPL21* | YALI1_F08260g | Ribosomal 60S subunit protein L21 | pProUA-RPL21 | 34 | 0,1 | 25,77 | 1,46 |
| **RPL7** | *Y. lipolytica RPL7* | YALI1_E16649g | Ribosomal 60S subunit protein L7 | pProUA-RPL7 | 18,5 | 2,6 | 27,23 | 0,1 |
| **RPL38** | *Y. lipolytica RPL38* | YALI1_B14993g | Ribosomal 60S subunit protein L38 | pProUA-RPL38 | 28,8 | 0,3 | 26,94 | 1,64 |
| **RPL35** | *Y. lipolytica RPL35* | YALI1_A09798g | Ribosomal 60S subunit protein L35 | pProUA-RPL35 | 37,7 | 1,4 | 28,38 | 1,87 |
| **RPL12** | *Y. lipolytica RPL12* | YALI1_D17206g | Ribosomal 60S subunit protein L12 | pProUA-RPL12 | 34,4 | 2,9 | 30 | 0,06 |
| **RPL26** | *Y. lipolytica RPL26* | YALI1_E25317g | Ribosomal 60S subunit protein L26 | pProUA-RPL26 | 29,7 | 2,1 | 31,23 | 4,39 |
| **RPL36** | *Y. lipolytica RPL36* | YALI1_E35963g | Ribosomal 60S subunit protein L36 | pProUA-RPL36 | 36,5 | 6,2 | 37,28 | 1,04 |
| **RPL30** | *Y. lipolytica RPL30* | YALI1_E27871g | Ribosomal 60S subunit protein L30 | pProUA-RPL30 | 56,3 | 6,1 | 48,14 | 2,49 |
| **TEF1** | *Y. lipolytica TEF1* | YALI1_C12642g | Translational elongation factor EF-1 alpha | pProUA-TEF1 | 100 | 2,33 | 100 | 3,73 |
| **RPL25** | *Y. lipolytica RPL25* | YALI1_F32792g | Ribosomal 60S subunit protein L25 | pProUA-RPL25 | 130,9 | 9,17 | 125,66 | 3,38 |

**Table S14** Measured strength of 29 natural promoters of different sources

| **Promoter** | **Source gene** | **Locus tag** | **Supposed function**  **of gene product** | **Donor plasmid** | **Promoter strength (%)** | | | |
| --- | --- | --- | --- | --- | --- | --- | --- | --- |
| **YPD mean** | **YPD**  **SD** | **YNBD**  **mean** | **YNBD**  **SD** |
| **Parent S234** |  |  |  |  | 0,0 | 0,33 | 0,0 | 0,66 |
| **FUM1** | *Y. lipolytica FUM1* | YALI0C06776g | Fumarate hydrotase mitochondrial | pProUA-FUM1 | 0,82 | 0,52 | 0,64 | 0,36 |
| **PGK1** | *Y. lipolytica PGK1* | YALI1_D15424g | Phosphoglycerate kinase | pProUA-PGK1 | 0,62 | 0,27 | 0,75 | 0,5 |
| **SDH1** | *Y. lipolytica SDH1* | YALI1_D14260g | Flavoprotein subunit of succinate dehydrogenase | pProUA-SDH1 | 0,34 | 0,31 | 0,87 | 0,65 |
| **AQP** | *Y. lipolytica AQP* | YALI1_F00616g | Protein similar to aquaporin 9 (Small solute channel 1) | pProUA-AQP | 0,8 | 0,7 | 0,91 | 0,34 |
| **hCMV** | *Human Cytomegalovirus* |  | Human cytomegalovirus (CMV) immediate early promoter | pProUA-hCMV | 2,62 | 0,5 | 1,72 | 0,84 |
| **LPD1** | *Y. lipolytica LPD1* | YALI1_D26360g | Dihydrolipoyl dehydrogenase | pProUA-LPD1 | 4,08 | 0,62 | 2,26 | 1,38 |
| **FBA1** | *Y. lipolytica FBA1* | YALI0E26004g | Fructose 1,6-bisphosphate aldolase | pProUA-FBA1 | 1,36 | 0,2 | 2,6 | 0,33 |
| **LSC2** | *Y. lipolytica LSC2* | YALI1_D05892g | Beta subunit of mitochondrial succinyl-CoA ligase | pProUA-LSC2 | 4 | 0,8 | 3,95 | 2,23 |
| **NUAM** | *Y. lipolytica NUAM* | YALI1_D07089g | Subunit NUAM of NADH:Ubiquinone Oxidoreductase (Complex I) | pProUA-NUAM | 4,65 | 0,32 | 4,33 | 1,52 |
| **TPI1** | *Y. lipolytica TPI1* | YALI1_F07847g | Triosephosphate isomerase | pProUA-TPI1 | 9,1 | 1,03 | 5,94 | 2,15 |
| **COX4** | *Y. lipolytica COX4* | YALI1_E23635g | Subunit IV of cytochrome c oxidase | pProUA-COX4 | 7,4 | 0,3 | 6,16 | 1,79 |
| **PDA1** | *Y. lipolytica PDA1* | YALI1_F27556g | E1α subunit of the pyruvate dehydrogenase | pProUA-PDA1 | 6,9 | 0,27 | 7,23 | 2,38 |
| **IDH1** | *Y. lipolytica IDH1* | YALI1_E06015g | Subunit of mitochondrial NAD(+)-dependent isocitrate dehydrogenase | pProUA-IDH1 | 11,4 | 0,81 | 10,09 | 3,14 |
| **MDH1** | *Y. lipolytica MDH1* | YALI1_D20676g | Mitochondrial malate dehydrogenase | pProUA-MDH1 | 8,98 | 1,1 | 10,67 | 1,09 |
| **QCR2** | *Y. lipolytica QCR2* | YALI1_F12033g | Subunit 2 of ubiquinol cytochrome-c reductase (Complex III) | pProUA-QCR2 | 10,55 | 0,4 | 10,44 | 2,48 |
| **HHF2** | *Y. lipolytica HHF2* | YALI1_F33331g | Histone H4 | pProUA-HHF2 | 8,18 | 1,5 | 12,63 | 0,67 |
| **ATP1** | *Y. lipolytica ATP1* | YALI1_F04455g | Alpha subunit of the F1 sector of mitochondrial ATP synthase | pProUA-ATP1 | 19,22 | 1,24 | 13,54 | 3,47 |
| **ACO1** | *Y. lipolytica ACO1* | YALI1_D11984g | Gene encoding a mitochondrial aconitate hydratase | pProUA-ACO1 | 18,87 | 0,6 | 13,6 | 1,44 |
| **CIT1** | *Y. lipolytica CIT1* | YALI1_E03300g | Citrate synthase mitochondrial | pProUA-CIT1 | 16,33 | 0,59 | 17,76 | 0,56 |
| **CYC1** | *Y. lipolytica CYC1* | YALI1_D11769g | Cytochrome c | pProUA-CYC1 | 25,58 | 3,71 | 20,06 | 3,13 |
| **ENO1** | *Y. lipolytica ENO2* | YALI1_F22436g | Enolase 1 | pProUA-ENO1 | 21,24 | 1,41 | 20,11 | 0,13 |
| **HYP2** | *Y. lipolytica HYP2* | YALI1_C09230g | Translation elongation factor eIF-5A | pProUA-HYP2 | 37,24 | 7,1 | 27,07 | 2,84 |
| **ATP2** | *Y. lipolytica ATP2* | YALI1_B05364g | Beta subunit of the F1 sector of mitochondrial ATP synthase | pProUA-ATP2 | 22,3 | 4,4 | 27,43 | 2,82 |
| **HHF1** | *Y. lipolytica HHF1* | YALI1_C15964g | Histone H4 | PproUA-HHF1 | 31,78 | 0,2 | 31,49 | 0,53 |
| **HTB1** | *Y. lipolytica HTB1* | YALI1_E31389g | Histone H2B | pProUA-HTB1 | 62,35 | 1,4 | 53,85 | 1,63 |
| **HHT1** | *Y. lipolytica HHT1* | YALI1_F33345g | Histone H3 | pProUA-HHT1 | 68,9 | 1,4 | 61,29 | 5,75 |
| **TEF1** | *Y. lipolytica TEF1* | YALI1_C12642g | Translational elongation factor EF-1 alpha | pProUA-TEF1 | 100 | 3,7 | 100 | 3,33 |
| **EXP1** | *Y. lipolytica EXP1* | YALI1_C16851g | Cargo receptor protein for Pma1p | pProUA-EXP1 | 84,76 | 1,47 | 103,55 | 7,02 |
| **TEFIn** | *Y. lipolytica TEFIn* | YALI1_C12642g | Translational elongation factor EF-1 alpha; | pProUA-TEFIn | 117,3 | 4,8 | 115 | 1,81 |
| **TDH1** | *Y. lipolytica TDH1* | YALI1_C08262g | Glyceraldehyde-3-phosphate dehydrogenase | pProUA-TDH1 | 122,25 | 13,38 | 166,1 | 12,45 |

**8.2 Hybrid promoter library**

The number of natural promoters available for a single organism is limited and their number and properties can be significantly expanded by combining regulatory sequences. Such sequences can be of different origins, including genes derived from other species. Therefore, we decided to use new screening system (*i.e.* the Pro Module) to test another library consisting of hybrid promoters. Initially, we designed 105 promoters. However, only 43 of them were possible to synthesize due to wildly distributed homopolymer sequences. As a result, these 43 hybrid promoters were synthesized and assembled as pProUA-series using commercial service (Supplementary GenBank files). Each promoter was 800 bp in length and combined three to four sequences from seven different yeast species, including *Candida hispaniensis*, *Kluyveromyces lactis*, *Kluyveromyces marxianus*, *Komagataella phaffii*, *Ogataea polymorpha, S. cerevisiae,* and *Y. lipolytica* (Section 10). All sequences were selected from upstream regions of genes expected to be highly expressed due to their roles in highly demanded cellular functions, including glycolysis, TCA cycle, pentose phosphate pathway, substrate utilization, cytosolic membrane transport, electron transfer and translation machinery (Table S15).

All pProUA-series plasmids along with a positive control *TEF1* promoter were linearized using MssI and co-transformed with pCasNA-IntC2 into S244 strain (W29∆ura∆ku70) (Section S2.6 of Supplementary Manual). Two independent transformants with each construct were analysed. As the negative control, parental strain S234 (W29∆ku70ura+) was used. First, cultures were grown overnight in 2.5 mL of YPD. The biomass was washed with saline solution and diluted in 10% glycerol up to an OD600 1.0. Such seeding material was aliquoted by 10 µL in 96-well flat-bottom plates and stored at -80 ⁰C. To measure promoter activities at single-cell level, flow cytometry was used. For this purpose, each aliquot was mixed with 90 µL of either YPG or YNBG, both supplemented with 1.1% glycerol. Therefore, each well contained 100 µL of culture with initial OD600 0.1 and glycerol concentration adjusted to 2%. Microplates were grown in plate reader Synergy HT (BioTek). To increase the aeration, a plastic lid was used and maximal shaking rate was applied. OD600 was measured every 20 min and monitored using Gen5 software (BioTek). Using trial experiments the mid-exponential growth phase was observed at 9th or 15th hours of the incubation in YPG or YNBG media, respectively. At that time point cultivations were stopped and microplates were transferred to flow cytometer Attune NxT (Thermo Fisher Scientific). The fluorescence data were collected from 10,000 cells for each sample and GFP fluorescence was measured using excitation with a 488 nm laser and a 510/10 nm emission filter. The data were analysed using FlowJo software (Ashland, OR). As a result, the median fluorescence intensity (*MFI*) was calculated for each sample based on fluorescence of individual cells. Promoter strength (*Px*) was estimated using the following equation:

(2)

, where *MFIPx*, *MFITEF1*, and *MFIParent* are median fluorescence intensity of strains with promoters *Px*, *TEF1* and the parent strain S234, respectively. Resulting strengths of 43 hybrid promoters are summarized in Table S15.

**Table S15** Measured strength and composition of 43 hybrid promoters

| **Promoter** | **Structure of a hybrid promote** | | | | **Relative Promoter Strength (%)** | | | |
| --- | --- | --- | --- | --- | --- | --- | --- | --- |
| **Source 1**  **(species gene)** | **Source 2**  **(species gene)** | **Source 3**  **(species gene)** | **Source 4**  **(species gene)** | **YPG mean** | **YPG**  **SD** | **YNBG**  **mean** | **YNBG**  **SD** |
| **Parent S234** |  |  |  |  | 0,0 | 0,01 | 0,0 | 0,15 |
| **P78** | *S. cerevisiae TEF1* | *K. phaffii TEF1* | *S. cerevisiae HXT7* |  | 0,5 | 0,10 | -0,1 | 0,05 |
| **P98** | *Y. lipolytica PGK1* | *O. polymorpha CYC1* | *O. polymorpha PSH1* |  | 0,7 | 0,19 | 0,1 | 0,05 |
| **P24** | *Y. lipolytica GPDH* | *Y. lipolytica ENO2* | *K. marxianus TAL1* |  | 0,4 | 0,14 | 0,2 | 0,30 |
| **P1** | *S. cerevisiae PFK2* | *O. polymorpha PYK1* | *K. phaffii GND2* |  | 0,0 | 0,17 | 0,2 | 0,50 |
| **P36** | *S. cerevisiae ZWF1* | *K. phaffii PGK1* | *Y. lipolytica ADH1* |  | 0,5 | 0,04 | 0,2 | 0,05 |
| **P55** | *Y. lipolytica ENO2* | *O. polymorpha PYK1* | *S. cerevisiae PGK1* |  | 0,8 | 0,13 | 0,3 | 0,10 |
| **P11** | *S. cerevisiae ENO1* | *K. phaffii GPM1* | *Y. lipolytica GPDH* |  | 0,2 | 0,08 | 0,4 | 0,00 |
| **P43** | *Y. lipolytica PGK1* | *K. marxianus TAL1* | *K. lactis GPDH* |  | 0,8 | 0,09 | 0,4 | 0,10 |
| **P23** | *Y. lipolytica TEF1* | *Y. lipolytica ZWF1* | *K. marxianus CYC1* |  | 0,5 | 0,02 | 0,4 | 0,20 |
| **P95** | *S. cerevisiae TEF1* | *Y. lipolytica ZWF1* | *K. phaffii PYK1* |  | 1,0 | 0,12 | 0,4 | 0,05 |
| **P8** | *O. polymorpha TPI1* | *O. polymorpha PYK1* | *K. phaffii ADH1* |  | 0,4 | 0,08 | 0,9 | 0,35 |
| **P99** | *Y. lipolytica GPDH* | *O. polymorpha PFK2* | *K. phaffii AOX1* |  | 0,9 | 0,03 | 1,2 | 0,30 |
| **P94** | *Y. lipolytica GPDH* | *O. polymorpha PGI1* | *O. polymorpha TAL1* |  | 1,2 | 0,01 | 1,4 | 0,00 |
| **P3** | *K. phaffii MDH1* | *K. phaffii PFK1* | *K. phaffii GND2* |  | 0,4 | 0,35 | 1,4 | 0,05 |
| **P10** | *K. phaffii MDH1* | *O. polymorpha ENO2* | *O. polymorpha TAL1* |  | 0,8 | 0,04 | 1,4 | 1,40 |
| **P92** | *O. polymorpha ZWF1* | *Y. lipolytica PFK1* | *O. polymorpha TAL1* |  | 1,2 | 0,00 | 1,5 | 0,05 |
| **P32** | *S. cerevisiae ENO1* | *S. cerevisiae ZWF1* | *Y. lipolytica PFK1* |  | 1,2 | 0,10 | 1,6 | 0,05 |
| **P13** | *Y. lipolytica PGK1* | *K. marxianus MDH1* | *K. phaffii AOX1* |  | 0,5 | 0,27 | 1,8 | 0,00 |
| **P37** | *Y. lipolytica PGK1* | *Y. lipolytica FBA1* | *Y. lipolytica ENO2* |  | 1,5 | 0,13 | 2,1 | 0,35 |
| **P14** | *Y. lipolytica GPDH* | *O. polymorpha ENO2* | *K. phaffii AOX1* |  | 1,0 | 0,03 | 2,3 | 0,74 |
| **P5** | *O. polymorpha ACO1* | *K. phaffii PGK1* | *K. phaffii GND2* |  | 0,5 | 0,25 | 2,5 | 0,05 |
| **P50** | *Y. lipolytica MDH1* | *K. lactis PFK2* | *K. phaffii AOX* |  | 2,3 | 0,03 | 2,5 | 0,15 |
| **P4** | *K. phaffii TPI1* | *O. polymorpha ENO2* | *K. phaffii GND2* |  | 0,3 | 0,26 | 2,8 | 0,15 |
| **P12** | *K. phaffii TPI1* | *S. cerevisiae ADH1* | *Y. lipolytica PFK1* |  | 1,0 | 0,23 | 3,2 | 0,75 |
| **P38** | *O. polymorpha SDH1* | *O. polymorpha PGI1* | *Y. lipolytica ENO2* |  | 1,8 | 0,02 | 3,9 | 0,30 |
| **P2** | *K. phaffii ACO1* | *K. phaffii IDP2* | *K. phaffii GND2* |  | 0,4 | 0,14 | 4,1 | 1,20 |
| **P73** | *S. cerevisiae TEF1* | *K. lactis TEF1* | *K. phaffii AOX1* |  | 5,3 | 0,17 | 4,1 | 0,90 |
| **P26** | *Y. lipolytica GPDH* | *O. polymorpha PSH1* | *O. polymorpha IDH2* | *Y. lipolytica GPDH* | 1,0 | 0,16 | 4,9 | 0,25 |
| **P28** | *Y. lipolytica TEF1* | *Y. lipolytica ENO2* | *Y. lipolytica PFK1* |  | 2,7 | 0,13 | 5,1 | 0,00 |
| **P47** | *S. cerevisiae PGK1* | *Y. lipolytica GPDH* | *S. cerevisiae PGK1* | *K. phaffii ADH1* | 0,9 | 0,08 | 5,8 | 1,00 |
| **P103** | *K. lactis ENO1* | *Y. lipolytica ENO2* | *Y. lipolytica GPDH* |  | 4,9 | 0,03 | 5,9 | 0,55 |
| **P101** | *Y. lipolytica PGK1* | *Y. lipolytica ZWF1* | *Y. lipolytica GND2* |  | 4,7 | 0,36 | 6,8 | 0,20 |
| **P96** | *K. phaffii TPI1* | *Y. lipolytica TPI1* | *Y. lipolytica GND2* |  | 5,1 | 0,40 | 8,1 | 0,51 |
| **P34** | *Y. lipolytica STL1* | *K. marxianus MDH1* | *Y. lipolytica GND2* |  | 5,5 | 0,46 | 12,9 | 0,67 |
| **P25** | *S. cerevisiae PFK2* | *S. cerevisiae ZWF1* | *Y. lipolytica FBA1* |  | 3,9 | 0,28 | 13,8 | 0,78 |
| **P97** | *K. phaffii PMA1* | *K. phaffii PGK1* | *Y. lipolytica FBA1* |  | 5,8 | 0,51 | 14,3 | 0,25 |
| **P45** | *Y. lipolytica ENO2* | *Y. lipolytica GPDH* | *Y. lipolytica ACO1* | *Y. lipolytica ENO2* | 6,1 | 0,59 | 15,2 | 0,72 |
| **P46** | *K. phaffii CYC1* | *Y. lipolytica GPDH* | *Y. lipolytica ZWF1* | *K. phaffii CYC1* | 7,9 | 0,93 | 18,2 | 0,10 |
| **TEF1** |  |  |  |  | 100,0 | 6,32 | 100,0 | 23,14 |
| **P68** | *S. cerevisiae TEF1* | *C. hispaniensis TEF1* | *Y. lipolytica TEF1* |  | 133,5 | 24,43 | 137,2 | 2,94 |
| **P67** | *Y. lipolytica TEF1* | *Y. lipolytica TEF1* | *C. hispaniensis TEF1* | *Y. lipolytica TEF1* | 106,1 | 2,32 | 143,0 | 8,03 |
| **P88** | *Y. lipolytica TEF1* | *K. marxianus TEF1* | *Y. lipolytica TEF1* |  | 119,0 | 18,97 | 156,2 | 0,91 |
| **P89** | *S. cerevisiae TEF1* | *K. marxianus TEF1* | *Y. lipolytica TEF1* |  | 134,5 | 13,66 | 168,0 | 1,99 |
| **P62** | *S. cerevisiae TEF1* | *K. lactis TEF1* | *Y. lipolytica TEF1* |  | 130,1 | 3,78 | 174,7 | 0,78 |

**9. CHARACTERISATION OF STANDARD INTEGRATION LOCI**

For each of the 16 standard integration loci described in the main text of the article a Lvl1.1 plasmid was constructed with promoter *TEF1*, gene *hrGFP*, and terminator *LIP2* (Table S17). The obtained overexpression constructs (pB8US1.1-hrGFP, pB11US1.1-hrGFP, pC2US1.1-hrGFP, pC7US1.1-hrGFP, pC13US1.1-hrGFP, pC14US1.1-hrGFP, pD6US1.1-hrGFP, pD12US1.1-hrGFP, pE6US1.1-hrGFP, pE8US1.1-hrGFP, pE12US1.1-hrGFP, pE15US1.1-hrGFP, pE16US1.1-hrGFP, pF8US1.1-hrGFP, pF9US1.1-hrGFP, and pF11US1.1-hrGFP) were linearized and co-transformed together with the corresponding standard Cas9-helpers (pCasNA-IntB8, pCasNA-IntB11, pCasNA-IntC2, pCasNA-IntC7, pCasNA-IntC13, pCasNA-IntC14, pCasNA-IntD6, pCasNA-IntD12, pCasNA-IntE6, pCasNA-IntE8, pCasNA-IntE12, pCasNA-IntE15, pCasNA-IntE16, pCasNA-IntF8, pCasNA-IntF9, and pCasNA-IntF11) into the S244 (W29∆ura∆ku70) strain of *Y. lipolytica* (Section 2.6 of Supplementary Manual). Successful integration for each locus was confirmed using colony PCR with standard primer sets (Tables S5 and S10 of Supplementary Manual). The efficiency of Cas9-mediated integration for the selected 16 standard loci are summarized in Table S5 of Supplementary Manual. Two independent transformants were isolated for each locus and hrGFP fluorescence was assayed in a plate reader as described in Section 8.1. The parental strain S234 (W29∆ku70ura+) was used as the negative control. The relative expression levels in the 16 loci are compared in Figure S27 and discussed in Section 2.1 of Supplementary Manual.

**10. APPENDIX**

**Table S16** Oligonucleotides used in this study (*continued on the next page*)

| # | Name | Sequence* |
| --- | --- | --- |
| 3193 | HPD-F | gcatCGTCTCATCGGGGTCTCAAATGTCACCTTCCGTCGAAGTC |
| 3194 | HPD-OE-R | CATGGGTGGTCACATCTCGAGAGCCAGTCTCAAG |
| 3195 | HPD-OE-F | GCTCTCGAGATGTGACCACCCATGTCGTGGGC |
| 3196 | HPD-R | ctgaCGTCTCTGGTCGGTCTCATAGATTAAAGGTTGCCTCGCTTGGCCTG |
| 3459 | ALK1-F | gcatGAAGACTCACGGACTGACTTGATACGCAACTG |
| 3460 | ALK1-R | atgcGAAGACAGCATTGTGCAGGAGTATTCTGGGGAG |
| 3369 | AAT1-Up950-F | atgcGCTCTTCACAGGTTTAAACGCGTCTTTAACAGGCGAAAAAC |
| 3370 | AAT1-Up950-R | gataGCTCTTCTTGGCCTCCTTCTCGGCCTCTC |
| 3371 | AAT1-Dn950-F | atgcGCTCTTCATAATGTCGAGCAGGGCCACGAG |
| 3372 | AAT1-Dn950-R | gataGCTCTTCTTCCGTTTAAACTGTCCTACAGTTTACACAC |
| 3373 | AAT1-chr-F2 | GTGCGCACTCTCTCACACC |
| 3204 | ARO8-Up500-F | CCAGATTTATATACCGAACACC |
| 3205 | ARO8-Up500-R | ACTTTTCCGCCTCTTTGTAGTCGTGCTTTTGG |
| 3206 | ARO8-Dn500-F | ACGACTACAAAGAGGCGGAAAAGTCTCTGCTC |
| 3207 | ARO8-Dn500-R | TCTCTCTCCCACATGTATGG |
| 3212 | ARO8-chr-F | CATACAAACATTCCATGTCGC |
| 3213 | ARO8-chr-R | GGCCTGTTTCTTGCATTACTC |
| 3208 | ARO9-Up500-F | TTTGGTGACGGAATAAGTCTC |
| 3209 | ARO9-Up500-R | TACAGAAAACACCGCTGGAAACAGTGATGATATAG |
| 3210 | ARO9-Dn500-F | CTGTTTCCAGCGGTGTTTTCTGTATAGTACAAG |
| 3211 | ARO9-Dn500-R | ATTGAGTGGCAATTCTGAACC |
| 3214 | ARO9-chr-F | GGTTACCTTATCATGCATGTG |
| 3215 | ARO9-chr-R | ACGTCTCAAAAGTGTCCAAAC |
| 3308 | AAT1-Up500-F | AACCAACCAAATAACCAAATAAC |
| 3309 | AAT1-Up500-R | AATCTGAGAGGTGTTTTGAGAGTCTGGTGGAG |
| 3310 | AAT1-Dn500-F | AGACTCTCAAAACACCTCTCAGATTGGTATGTTC |
| 3311 | AAT1-Dn500-R | GATGCTCGGTTACAGTCTAC |
| 3312 | AAT1-chr-F | CTAGTGGTCGACGACAACC |
| 3313 | AAT1-chr-R | GTAGTAAACAATAGCTAGTCAG |
| 3296 | AAT2-Up500-F | CTCCACCATCTAGTCATCTC |
| 3297 | AAT2-Up500-R | CGCATCTCGCAAGGCCGAAAAGGGCATCTG |
| 3298 | AAT2-Dn500-F | CTTTTCGGCCTTGCGAGATGCGCTCAAGAG |
| 3299 | AAT2-Dn500-R | TCGTGTCTACAAGTTGCTGC |
| 3300 | AAT2-chr-F | CCACGGATCCGCTGAAGC |
| 3301 | AAT2-chr-R | CCATACTAACAACTAAGCTCTC |
| 3064 | TEF-seq-F1 | CTGCAGTCTGGAATCTACGC |
| 3066 | ARO4-seq-R | GGTTTCTCCAGATAAGCTCTC |
| 3390 | ARO7-seq-R | CTCGTCGGGAGACTCGAAG |
| 3149 | Rdm1-20bp | TCGATGGGCCCCCGGTTCGATTCCGGGTCGGCGCA**ATATTATTGTACACCTACCG**GTTTTAGAGCTAGAAATAGCAAGTTAAAATAAGGC |
| 3150 | Rdm2-20bp | TCGATGGGCCCCCGGTTCGATTCCGGGTCGGCGCA**GCATCAGGTGGACTAGCATG**GTTTTAGAGCTAGAAATAGCAAGTTAAAATAAGGC |
| 3151 | Rdm3-20bp | TCGATGGGCCCCCGGTTCGATTCCGGGTCGGCGCA**ATGGACGAAATGCTTCACCA**GTTTTAGAGCTAGAAATAGCAAGTTAAAATAAGGC |
| 3216 | ARO8a-20bp | TCGATGGGCCCCCGGTTCGATTCCGGGTCGGCGCA**GCACGACATTCTCATCATCG**GTTTTAGAGCTAGAAATAGCAAGTTAAAATAAGGC |
| 3217 | ARO8c-20bp | TCGATGGGCCCCCGGTTCGATTCCGGGTCGGCGCA**GAACAGCTCAACAACTGGGT**GTTTTAGAGCTAGAAATAGCAAGTTAAAATAAGGC |
| 3218 | ARO8i-20bp | TCGATGGGCCCCCGGTTCGATTCCGGGTCGGCGCA**GTCCGTCGGTATCAAAGTTG**GTTTTAGAGCTAGAAATAGCAAGTTAAAATAAGGC |
| 3219 | ARO9a-20bp | TCGATGGGCCCCCGGTTCGATTCCGGGTCGGCGCA**AGAAGCAGTACTCCTCAACA**GTTTTAGAGCTAGAAATAGCAAGTTAAAATAAGGC |
| 3220 | ARO9i-20bp | TCGATGGGCCCCCGGTTCGATTCCGGGTCGGCGCA**GACAACATTAAATCTGTCGG**GTTTTAGAGCTAGAAATAGCAAGTTAAAATAAGGC |
| 3221 | ARO9k-20bp | TCGATGGGCCCCCGGTTCGATTCCGGGTCGGCGCA**GTGGACCTGCTCATTAACCC**GTTTTAGAGCTAGAAATAGCAAGTTAAAATAAGGC |
| 3306 | AAT1-20bp | TCGATGGGCCCCCGGTTCGATTCCGGGTCGGCGCA**GCAGTGGCGAAAGATTGAGG**GTTTTAGAGCTAGAAATAGCAAGTTAAAATAAGGC |
| 3302 | AAT2-20bp | TCGATGGGCCCCCGGTTCGATTCCGGGTCGGCGCA**AAGCAGATCTTCGAGAACGT**GTTTTAGAGCTAGAAATAGCAAGTTAAAATAAGGC |
| 3006 | URA3-20bp | TCGATGGGCCCCCGGTTCGATTCCGGGTCGGCGCA**CACGAGCTTGAGCACTCGAG**GTTTTAGAGCTAGAAATAGCAAGTTAAAATAAGGC |
| 3295 | HMG2-20bp | TCGATGGGCCCCCGGTTCGATTCCGGGTCGGCGCA**CACTTCGATATTCCTGACCG**GTTTTAGAGCTAGAAATAGCAAGTTAAAATAAGGC |

* – The variative region of recombineering oligonucleotides is underlined.

**Table S17** Assembly of plasmid constructs (*continued on the next page*)

| **Module**  **(Lvl)** | **Assembled plasmid** | **Backbone plasmid** | **Part 1** | **Part 2** | **Part 3** | **Manual section describing assembly (or GenBank file)** |
| --- | --- | --- | --- | --- | --- | --- |
| Exp (Lvl0) | pGenC-YlHPD1 | pYTK001 | OE-PCR from W29 by primers 3193, 3194, 3195, 3196 |  |  | 1.2 |
| Exp (Lvl0) | pGenA-ScARO4K229L | Gene synthesis |  |  |  | (GenBank file is provided) |
| Exp (Lvl0) | pGenK-ScARO7G141S | Gene synthesis |  |  |  | (GenBank file is provided) |
| Exp (Lvl1) | pZUS1.1-HPD1 | pZUS1.1 | pProC-TEF1 | pGenC-YlHPD1 | pTerC-LIP2 | 1.3.3 |
| Exp (Lvl1) | pZUS1.2-ARO4 | pZUS1.2 | pProC-TEF1 | pGenA-ScARO4K229L | pTerC-LIP2 | 1.3.3 |
| Exp (Lvl1) | pZUS1.3-ARO7 | pZUS1.3 | pProC-TEF1 | pGenK-ScARO7G141S | pTerC-LIP2 | 1.3.3 |
| Exp (Lvl1) | pB8US1.1-hrGFP | pB8US1.1 | pProC-TEF1 | pGenC-hrGFP | pTerC-LIP2 | 1.3.3 |
| Exp (Lvl1) | pB11US1.1-hrGFP | pB11US1.1 | pProC-TEF1 | pGenC-hrGFP | pTerC-LIP2 | 1.3.3 |
| Exp (Lvl1) | pC2US1.1-hrGFP | pC2US1.1 | pProC-TEF1 | pGenC-hrGFP | pTerC-LIP2 | 1.3.3 |
| Exp (Lvl1) | pC7US1.1-hrGFP | pC7US1.1 | pProC-TEF1 | pGenC-hrGFP | pTerC-LIP2 | 1.3.3 |
| Exp (Lvl1) | pC13US1.1-hrGFP | pC13US1.1 | pProC-TEF1 | pGenC-hrGFP | pTerC-LIP2 | 1.3.3 |
| Exp (Lvl1) | pC14US1.1-hrGFP | pC14US1.1 | pProC-TEF1 | pGenC-hrGFP | pTerC-LIP2 | 1.3.3 |
| Exp (Lvl1) | pD6US1.1-hrGFP | pD6US1.1 | pProC-TEF1 | pGenC-hrGFP | pTerC-LIP2 | 1.3.3 |
| Exp (Lvl1) | pD12US1.1-hrGFP | pD12US1.1 | pProC-TEF1 | pGenC-hrGFP | pTerC-LIP2 | 1.3.3 |
| Exp (Lvl1) | pE6US1.1-hrGFP | pE6US1.1 | pProC-TEF1 | pGenC-hrGFP | pTerC-LIP2 | 1.3.3 |
| Exp (Lvl1) | pE8US1.1-hrGFP | pE8US1.1 | pProC-TEF1 | pGenC-hrGFP | pTerC-LIP2 | 1.3.3 |
| Exp (Lvl1) | pE12US1.1-hrGFP | pE12US1.1 | pProC-TEF1 | pGenC-hrGFP | pTerC-LIP2 | 1.3.3 |
| Exp (Lvl1) | pE15US1.1-hrGFP | pE15US1.1 | pProC-TEF1 | pGenC-hrGFP | pTerC-LIP2 | 1.3.3 |
| Exp (Lvl1) | pE16US1.1-hrGFP | pE16US1.1 | pProC-TEF1 | pGenC-hrGFP | pTerC-LIP2 | 1.3.3 |
| Exp (Lvl1) | pF8US1.1-hrGFP | pF8US1.1 | pProC-TEF1 | pGenC-hrGFP | pTerC-LIP2 | 1.3.3 |
| Exp (Lvl1) | pF9US1.1-hrGFP | pF9US1.1 | pProC-TEF1 | pGenC-hrGFP | pTerC-LIP2 | 1.3.3 |
| Exp (Lvl1) | pF11US1.1-hrGFP | pF11US1.1 | pProC-TEF1 | pGenC-hrGFP | pTerC-LIP2 | 1.3.3 |
| Exp (Lvl2) | pZUA2.3-HPD1-ARO4-ARO7 | pZUA2.3 | pZUS1.1-HPD1 | pZUS1.1-ARO4 | pZUS1.1-ARO7 | 1.3.4 |
| Pro | pProUA-ALK1 | pProUA-mScarlet | PCR from W29 by primers 3459 and 3460 |  |  | 1.8 |
| Del | pDelUK-AAT1 | pDelUK-RG | PCR from W29 by primers 3369 and 3370 | PCR from W29 by primers 3371 and 3372 |  | 1.4 |
| Int | pE8US-HPD1-ARO4-ARO7 | pE8US1.1 | pZUA2.3-HPD1-ARO4-ARO7 |  |  | 1.5.1 |
| Int | pDelUK-AAT1::HPD1-ARO4-ARO7 | pDelUK-AAT1 | pE8US-HPD1-ARO4-ARO7 |  |  | 1.5.2 |
| Int/MEx | pE8A1.1-HPD1 | pE8UA2.2 | pZUS1.1-HPD1 |  |  | 1.5.1/1.6 |
| Int/MEx | pE8A1.2-ARO4 | pE8UA2.2 | pZUS1.2-ARO4 |  |  | 1.5.1/1.6 |
| Int/MEx | pE8A1.3-ARO7 | pE8UA2.2 | pZUS1.3-ARO7 |  |  | 1.5.1/1.6 |
| Int/MEx | pE8S-HPD1-ARO4-ARO7 | pE8US1.1 | pZUA2.3-HPD1-ARO4-ARO7 |  |  | 1.5.1/1.6 |
| MEx | pC2S1.1-hrGFP | pC2US1.1-hrGFP |  |  |  | 1.6 |
| MEx | pD12S1.1-hrGFP | pD12US1.1-hrGFP |  |  |  | 1.6 |
| MEx | pE8S1.1-hrGFP | pE8US1.1-hrGFP |  |  |  | 1.6 |
| Cas | pCasNA-Rdm1 | pCasNA-RK | Oligo 3149 |  |  | 1.7 |
| Cas | pCasNA-Rdm2 | pCasNA-RK | Oligo 3150 |  |  | 1.7 |
| Cas | pCasNA-Rdm3 | pCasNA-RK | Oligo 3151 |  |  | 1.7 |
| Cas | pCasNA-ARO8a | pCasNA-RK | Oligo 3216 |  |  | 1.7 |
| Cas | pCasNA-ARO8c | pCasNA-RK | Oligo 3217 |  |  | 1.7 |
| Cas | pCasNA-ARO8i | pCasNA-RK | Oligo 3218 |  |  | 1.7 |
| Cas | pCasNA-ARO9a | pCasNA-RK | Oligo 3219 |  |  | 1.7 |
| Cas | pCasNA-ARO9i | pCasNA-RK | Oligo 3220 |  |  | 1.7 |
| Cas | pCasNA-ARO9k | pCasNA-RK | Oligo 3221 |  |  | 1.7 |
| Cas | pCasNA-AAT1 | pCasNA-RK | Oligo 3306 |  |  | 1.7 |
| Cas | pCasNA-AAT2 | pCasNA-RK | Oligo 3302 |  |  | 1.7 |
| Cas | pCasNA-URA3 | pCasNA-RK | Oligo 3006 |  |  | 1.7 |
| Cas | pCasNA-HMG2 | pCasNA-RK | Oligo 3295 |  |  | 1.7 |

**Structure of hybrid promoters**

Sequence and structure of 43 hybrid promoters tested in the study are provided. Each promoter consists of several fragments which are parts of natural promoters derived from seven different yeast genomes. The source of each fragment (yeast species and gene name) is specified above the sequence panel. Corresponding DNA fragments and sources are highlighted using the same colours.

Hybrid promoter P1

*S. cerevisiae PFK2 O. polymorpha PYK1 K. phaffii GND2*

AAAACGAAGATTAAGATAAAGTTGGGTAAAATCCGGGGTAAGAGGCAAGGGGGTAGAGAAAAAAAAACCGGAGTCATTATATACGATACCGTCCAGGGTAAGACAGTGATTTCTAGCTTCCACTTTTTTCAATTTCTTTTTTTCGTTCCAAATGGCGTCCACCCGTACATCCGGAATCTGACGGCACAAGAGCCGATTAGTGGAAGCCACGGTTACGTGATTGCGGTTTCGCGGCGACCGTCGCACTATGTCCCGCACGCGCCGCTTGGTAGACTGGCCAGCGTCGTCCTGGCTGTGTGCATCGCTTTTGTTGAGCTCGTGTTGGAATTTCAGTATAAGCGATTCCGTCAGACTCACTGCATCTGGGTCAGAGGGAGGCTTTAGGACAGGAGCCATCTGTACAGAGGCTACGGAGTGTGGTGGCGGGTTCATGGGTGGCTCAAGCGGTCTAAAAGCAAAGGTGCGCGGCCGTACGTTATTGTTTGTGTGGGTACGCGATAAATAAAAAATCAGACAATCGGCTATGGGGGTGACATAAGCGATGAGCAAACTCTATAGCCTCGGCAAACAGTCTCTTCCCTTGTCCCTCATTGATACCTCTTTATTCTCCCCCACCACCATACACTACCTTCCTCGCACCCCTGTCATCACAACCGCAATATAATTGATGCGCGGTTTCTTGCCTAATCCATCGTCCAACAGAGAGGTCGCTCTCCTTATATATATAGTTGATCCCCCTTTTTTTCTACCCTTGCAATTTTTTTTTGGGACCAAAGAAAAGAAACAAGACTGATACAAAA

Hybrid promoter P2

*K. phaffii ACO1 K. phaffii IDP2 K. phaffii GND2*

GGTAAATACTTTTCTAGTGCACCCCGACATTCGACTCAAAAGGCTTAAACTAAACTCCTAAAATGTCCGTGGTTGACCAATAGAAAGTATCACTCAGCTCCCTGATTGTTCATAGCCTAACTGTTTCTGAATCTCTCCAAGTTTATTGCTGTCGGGTGAGCCTATGATTATCCCCTTTCACAATAGGCTCATTGTGTCTTAGGAAGTACCTGCCCACTTCCCCCTGATAAACTTTCCACCATCCCCGGTCATTCGCTCATGACCTTGTTATTACCATGCCAAAACATCCCATAATGAAAGGGTATCGGCAACATGGGAGCTAAATTTCAGACCCTCGAGATGGAGTCGGTAATCGTTCGAGAACAATTTAACAGGTACAATGGTTATATGCAAGGAGCCGAGAAATTAACTTGGAGTTTTGGTTCTGTTTGGAGTTGTCTCCGTTGGAGGAACAGAATACTAAACTTACTTGCAACAATTAATGAATAGGGTGTAGGTTTTGGACATGAATACTATTGGTAGATGATAAAGAGTGAGGTCGTAGCTTGTAGTAACTGTAATCGTTAAGGGGTGTTCTTGATGATCTTGTATTGATACCTCTTTATTCTCCCCCACCACCATACACTACCTTCCTCGCACCCCTGTCATCACAACCGCAATATAATTGATGCGCGGTTTCTTGCCTAATCCATCGTCCAACAGAGAGGTCGCTCTCCTTATATATATAGTTGATCCCCCTTTTTTTCTACCCTTGCAATTTTTTTTTGGGACCAAAGAAAAGAAACAAGACTGATACAAAA

Hybrid promoter P3

*K. phaffii MDH1 K. phaffii PFK1 K. phaffii GND2*

TGAGGTGAAATATTCTTTAGTAATCTAGCAGGGAATCCTTGGAAGGGTAATTTAGACGGAAGACGTCATCTTGCGGAAGGGTGAAACATTCCAAGCAGAGTGCTGGTTCCGAGATTCTCCGCTCCTGTAGAAACCTTCAACCTTCCAACATTAGAACCTTCGCGAATAGACTCCCTATCCAATCACGTTTCTCCGTTTCAAGGAAGTAGCCTGGGTGTCTATGGTTAATATGTTCCTGCAGCGCGACTAATACTACGAATTTGCGCGCCTGCAACTCTCCTCTCTCAGTCTGGTTCTTGAAGATGTGTATAAGTCTCGCAATGAAACAAATGTTCTGGGAGATGGATCGTTGCTCAATATGAATATCGGATTAGTAAAGTATAAACTTATAAGACTTTCAGTGGTTTTCACATTGACCTAGGCTTCTTATAACAAGGCGACTCCGAGAACAAAAGAAAAATAGAATGGCCCTCAAAGTAGCTTATGTGAGATCTGGGCTTGATTCCAATCATAGTCCCTAGTTGATTGCTTGTAGCAAATGCCACAACAGTAGGCATTTACGTCCTCACAGTCTCTTCCCTTGTCCCTCATTGATACCTCTTTATTCTCCCCCACCACCATACACTACCTTCCTCGCACCCCTGTCATCACAACCGCAATATAATTGATGCGCGGTTTCTTGCCTAATCCATCGTCCAACAGAGAGGTCGCTCTCCTTATATATATAGTTGATCCCCCTTTTTTTCTACCCTTGCAATTTTTTTTTGGGACCAAAGAAAAGAAACAAGACTGATACAAAA

Hybrid promoter P4

*K. phaffii TPI1 O. polymorpha ENO2 K. phaffii GND2*

GAAATATACCACATTGCCAGTTTATACAGATGGTTAAGGGTGAAAATCAACGTTACACCTTGACGACCCCATTATTACGATGGCGTGAAGGAGATGAAGACCGGGTAGAAGAAATAAGAAAAGCGGTACAGTTTAGGTCCGGAGATCTAGGGAAGGAGGCCTTAGCTTATATTGTAGCTGCTGAGAGAGAGGCAGCTGCTGGAAGATCTGAAGGCCCTATCAACCTCCTTTGAAAGGTCCCCTCTGGCAACAATAGTCAAATTTGTGCCGCGTTCTGGAGGGTTAGGCGCAACATCCACATGAGTCAGTTTGAGGAGTTGAGAAGACGAGGAGTCGCATAGAAGAAGGGGAGAGTCGCCCGGAACAGGCTTGGTGTCCTGGCCTGGAAAAGCAAACGGGTTGAGCGACAGACCGTTGACAAGAGAGAGCAAAAACACTAAAGGCACAGGGAAAAGCATTAGGAAGCAAGCACTGAAATTGTTGGCCTTAAAAGTCAATTGAGTTCCAATCATAGTCCCTAGTTGATTGCTTGTAGCAAATGCCACAACAGTAGGCATTTACGTCCTCACAGTCTCTTCCCTTGTCCCTCATTGATACCTCTTTATTCTCCCCCACCACCATACACTACCTTCCTCGCACCCCTGTCATCACAACCGCAATATAATTGATGCGCGGTTTCTTGCCTAATCCATCGTCCAACAGAGAGGTCGCTCTCCTTATATATATAGTTGATCCCCCTTTTTTTCTACCCTTGCAATTTTTTTTTGGGACCAAAGAAAAGAAACAAGACTGATACAAAA

Hybrid promoter P5

*O. polymorpha ACO1 K. phaffii PGK1 K. phaffii GND2*

GGTCACAATGTTTAAAGCTCTGTCGGTAAATTGTGATTGATCCATGATTAGCAAAATTGCAGTTGTAGGGAAAGCAATTTATACAGCGTACAGACATCAGACGCTTGTGATGGTCTGGTGATCTAGAGCCGCACAGAAACTTCTAGCAATATCTGGTGTGTCTGGGTGGTTGCTGGTGTCTGGTCTGCATAACTTGGCCTGAGGATGCTTATGTAATATGGCCTTCCTGGTGCATGGAAGTGGCTGGTGGCAAAAAAAAGTCTGTGAGCCTCCCAAGCAATCTACTAATGTTTATTTTTCGTCCAACCTAATTGTGGTTTCAAAGCGCTATCAGGTGGGGGGTAAGAGGAATGTGAGTGGAAAGCGAAAATAACTGGCAGCTGGGGTCAGATCCCGTGATGCCACCTCTTGTGGTATTTTGAAACGCGTGTTGCGATTGGCCGCGAGAACGGAAAGGAATATATTTACTGCCGATCGCATTTTGGCCTCAAATAAATCTTGAGCTTTTGGACATAGATTATATGTTCTTTCTTGGAAGCTCTTTCAGCTAATAGTGAAGTGTTTCCTACTAAGGATCGCCTCCAAACGTTCCAACTACGGGCGGAGGTTGCAAAGAAAACGGATCTCTCAGCGAATTGTTCTCATCCATGAGTGAGTCCTCTCCGTCCTTTCCTCGCGCCTGCCTAATCCATCGTCCAACAGAGAGGTCGCTCTCCTTATATATATAGTTGATCCCCCTTTTTTTCTACCCTTGCAATTTTTTTTTGGGACCAAAGAAAAGAAACAAGACTGATACAAAA

Hybrid promoter P8

*O. polymorpha TPI1 O. polymorpha PYK1 K. phaffii ADH1*

TGTGTTGGTGCTGGTGACTCATGGAATATGGGCGCGTGTCTTCCTGACCAAATGGTTTAGATGGAGCGTAGAAAAGTTCGAAGACCTGCAAAACGTGCCTAACTGTCGCTGGATAGTGATGGAAAAGGACGACACGACGCAGCGTTACGTCCTTCGCACGCATCTGAGCACGTGGTCAGAGCTTGAACAGACAAAAAGAGAGGAAGAAGTCAAAAGAGATGCCGGGAGAGAGTTTACATTCAACAGTACAGTGCCTCTCACAGACGACGAGGTAAGACAGGTAGCCGACGCGGAGGCGCGAGCGAAAAACGACCAGGTGCAAAAATCGCTAAAAATAAGCGATTCCGTCAGACTCACTGCATCTGGGTCAGAGGGAGGCTTTAGGACAGGAGCCATCTGTACAGAGGCTACGGAGTGTGGTGGCGGGTTCATGGGTGGCTCAAGCGGTCTAAAAGCAAAGGTGCGCGGCCGTACGTTATTGTTTGTGTGGGTACGCGATAAATAAAAAATCAGACAATCGGCTATGGGGGTGACATAAGCGATGAGCAAACTCTATAGCCTCGGCAAACCTGGGCGTGCACGGATGTCGTCGGAGTGCAATTTTCCAGCGGACCAAAGTTCACCAGGAAAAAAATGACCCAATATGGGCGGTGCCCAATGATCACACCAACAATTGGTCCACCCCTCCCCAATCTCTAATATTCACAATTCACCTCACTATAAATACCCCTGTCCTGCTCCCAAATTCTTTTTTCCTTCTTCCATCAGCTACTAGCTTTTATCTTATTTACTTTACGAAA

Hybrid promoter P10

*K. phaffii MDH1 O. polymorpha ENO2 O. polymorpha TAL1*

TGAGGTGAAATATTCTTTAGTAATCTAGCAGGGAACTCTTGGAAGGGTAATTTAGACGGAAGACGTCATCTTGCGGAAGGGTGAAACATTCCAAGCAGAGTGCTGGTTCCGAGATTCTCCGCTCCTGTAGAAACCTTCAACCTTCCAACATTAGAACCTTCGCGAATAGACTCCCTATCCAATCACGTTTCTCCGTTTCAAGGAAGTAGCCTGGGTGTCCGGTACGCCAAAAAACCTCCTTTGAAAGGTCCCCTCTGGCAACAATAGTCAAATTTGTGCCGCGTTCTGGAGGGTTAGGCGCAACATCCACATGAGTCAGTTTGAGGAGTTGAGAAGACGAGGAGTCGCATAGAAGAAGGGGAGAGTCGCCCGGAACAGGCTTGGTGTCCTGGCCTGGAAAAGCAAACGGGTTGAGCGAGACACCGTTGACAAGAGAGAGCAAAAACACTAAAGGCACAGGGAAAAGCATTAGGAAGCAAGCACTGAAATTAGAAAGGAGGCAAATAATTTGTCACCCAGCTGGCTCCTAAAATGGAAATGCATGTGGCAAAGTAATGGCTCCTAGGGTGGACTTCAAGGATACACTCACATTGATTGGTTGACAAGGTTACGTAAACTTGTCTCCGAAGACGAATTTGTTTACGAAGATAGCATTTATTTGTAGGTTATTGATTAGGTAAGATTTATTCAACGCAAACTGGGTGATGAATATAAATAAGCTCGGGTATTCCTCCGCAACCAGAACTTGAATTATATACGTTTCGATTGATTTCCATCAAATTATAAATTCAACAATTGCA

Hybrid promoter P11

*S. cerevisiae ENO1 K. phaffii GPM1 Y. lipolytica GPDH*

AGTTAGTAGCAACCTGAACTCGGTCATTGATGCATGCATGTGCCGTGAAGCGGGACAACCAGAAAAGTCGTCTATAAATGCCGGCACGTGCGATCATCGTGGCGGGGTTTTAAGAGTGCATATCACAAATTGTCGCATTACCGCGGAACCGCCAGATATTCATTACTTGACGCAAAAGCGTTTGAAATAATGACGAAAAAGAAGGAAGAAAAAAAAAGAAAAATACCGCTTCTAGGCGGGTTATCTACTGATCCGAGCTTCCACTAGGATAGCACCCAAACAGCTGCATATTTGGACGACCTTTACCAAATGAGAACCCTGTATTTCCTTGGCCAGAGCCTGAGAAACTGAACCCTGATCCAGACATTATCAATACCTTGGGTTATTAGTAGTGTCCGTTATTTTTCTGTTTAGGTTACGATTTTGCCAGATTTTTTGGGAGGAGGGAAACAAAAGAACCAGTGCTACACGACCTTTAAGTGCCATCAGGCATCCTGTTTTCTCGACCTCATCTCATCACATCCGTCAGTCTGAGCTTTCAGTTCTCAGTTTTCGATTGACTCTTGCCCTGCTGCGCGCACACCATACCCTGGCTCCCTCTCATGCTTCTGGCGTTACCCCGGAATCGTACATCCATGCCGCGAATCCCGGACAGGACTCAGACGGATTTCACTATTTGGGCGGGCTTGCTCCGTCTGTCCAAGGCAACATTTATATAAGGGTCTGCATCGCCGGCTCAATTGAATCTTTTTTCTTCTTCTCTTCTCTATATTCATTCTTGAATTAAACACACATCAACA

Hybrid promoter P12

*K. phaffii TPI1 S. cerevisiae ADH1 Y. lipolytica PFK1*

GAAATATACCACATTGCCAGTTTATACAGATGGTTAAGGGTGAAAATCAACGTTACACCTTGACGACCCCATTATTACGATGGCGTGAAGGAGATGAAGACCGGGTAGAAGAAATAAGAAAAGCGGTACAGTTTAGGTCCGGAGATCTAGGGAAGGAGGCCTTAGCTTATATTGTAGCTGCTGAGAGAGAGGCAGCTGCTGGAAGATCTGAAGGCCCTATCACGTATGATGATGGTGATGACCATTAGAGAACGCCCAGAGATTGATAGCCAGTTCTTGGACAACAATTCGGAACTTTATTCACGGTGCAAGTTTCACTACCCTTTTTCCATTTGCCATCTATTGAAGTAATAATAGGCGCATGCAACTTCTTTTCTTTTTTTTTCTTTTCTCTCTCCCCCGTTGTTGTCTCACCATATCCGCAATGACAAAAAAATGATGGAAGACACTAAAGGAAAAAATTAACGACAAAGACAGCACCAACAGATGTCGTTGTTCCAGAGCTGATGAGGGGTATCTCGAAGCACACGAAACTTTTTCCTTCCTTCATTCACGCACACTACTCTCTAATGAGCAACGGTATACGGCCTTCCTTCCAGTTACTTGAATTTGAAATAAAAAAAAGTTTGCTGTCTTGCTATCAAGTATAAATAGACCTGCAATTATTAATCTTTTGGCCGGCGTAACTTTGAGTGTCGTCAAACTCTGATATATATATAGAGAGAGGTATCCCAACAGTTGATAGTCGACAAACGCAAAACAGACGGACACTGAACCCCCCGCGCTTCAAAACACCGACA

Hybrid promoter P13

*Y. lipolytica PGK1 K. marxianus MDH1 K. phaffii AOX1*

CAGACAGTGACGAGTCATACATTCTCCGTATAATATCGTGTATGTCCAGACGATAGTCGTACTCGTACTCGTTACTGTAACTACTGTGCGAGTACTCGTGCATGTATCGTAGGTATTGTATGTTCGAGTACATACACATACGATACCAAACACTGCCCACTGTTCTGTCATGTTAGATCATGGCCAATCCACGTGACTTGCATGCAGGTTTGGCATTGAATATTCAGCGTGGCTACTACAAGTAGTACATACTGTATCAATACGATTGTACATACGGTACTCACCCTTTGCTACAGTATGTACATACAAGGGCGCACATGGACCTTGCCCTTTTGACTAGGGTACTACTCTGGGCAGGGTACTTACTAAACTGGGCCCAGACAGACAGAGGCCCAGACAGAGGCCCCAAAGAGAAGCCGCCAGGTTCCCTGCCTAGGCCTTCCTCTGGTTGCCCCCCAGAGTACCCTCCGGAACGAAACGAAACGAAAACGCACATCGTGATGCGCGCTATTATAATTGCGTCTTGCGAATTCCATACGCCATGCGCTTAGTTAGCACATGAAGATTCTGGTGGGAATACTGCTGATAGCCTAACGTTCATGATCAAAATTTAACTGTTCTAACCCCTACTTGACAGCAATATATAAACAGAAGGAAGCTGCCCTGTCTTAAACCTTTTTTTTATCATCATTATTAGCTTACTTTCATAATTGCGACTGGTTCCAATTGACAAGCTTTTGATTTTAACGACTTTTAACGACAACTTGAGAAGATCAAAAAACAACTAATTATTCGAAACA

Hybrid promoter P14

*Y. lipolytica GPDH O. polymorpha ENO2 K. phaffii AOX1*

GTAGGTTGGGTTGGGTGGGAGCACCCCTCCACAGAGTAGAGTCAAACAGCAGCAGCAACATGATAGTTGGGGGTGTGCGTGTTAAAGGAAAAAAAAAGAAGCTTGGGTTATATTCCCGCTCTATTTAGAGGTTGCGGGATAGACGCCGACGGAGGGCAATGGCGCCATGGAACCTTGCGGATATGGGGACGCCGCGGCGGACTGCGTCCGAACCAGCTCCAGCAGCGTTTTTTCCGGGCCATTGAGCCGACTGCGACCCCGCCAACGTGTCTTGGCCCACGCACTCATGTCATGTTGGTGTTGGGAGGCCACTTTTTAAGTAGCACAAGGCACCTAGCTCGCAGAAGGGGAGAGTCGCCCGGAACAGGCTTGGTGTCCTGGCCTGGAAAAGCAAACGGGTTGAGCGAGAGAGCGTTGACAAGAGAGAGCAAAAACACTAAAGGCACAGGGAAAAGCATTAGGAAGCAAGCACTGAAATTAGAAAGGAGGCAAATAATTTTTGAAAGCGACAATGCGTCGACAGAATCTGCCGACAGAAAGATTGTCGACAAGCGACGATAACGCAATAGTACATGGTGTTATTACGCAGTGTAACGTTCATGATCAAAATTTAACTGTTCTAACCCCTACTTGACAGCAATATATAAACAGAAGGAAGCTGCCCTGTCTTAAACCTTTTTTTTATCATCATTATTAGCTTACTTTCATAATTGCGACTGGTTCCAATTGACAAGCTTTTGATTTTAACGACTTTTAACGACAACTTGAGAAGATCAAAAAACAACTAATTATTCGAAACA

Hybrid promoter P23

*Y. lipolytica TEF1 Y. lipolytica ZWF1 K. marxianus CYC1*

GGTATTTTCACAATTGCACCCCAGCCAGACCGATAGCCGGCCGCAATCCGCCACCCACAACCGTCTACCTCCCACAAAAAGAAGTCACTTCCACCCTTTTCCACCAGATCATATGTCCCAACTTGCCAAATTAAAACCGTGCGAATTTTCAAAATAAACTTTGGCAGGAAGGCTGCAAAGGAGGGGCTGGTGAGGGCGTCTGGAAGTCGACCACACACCGGGTTGGCGGCGTATTTGTGTCCCAAAAAACAGCCCCAATTGCCCCAATTGACCCCAAATTGACCCAGTAGCGGGCCCAACCCCGGCGAGAGCCCCCTTCACCCCACATATCAAACCTCCCCCGGTTCCCACACTTGCCGTTAAGGGCGTAGGGTACTGCAGTCTGGATAGTTCACCAGTCACGCTGGTGGGCCATTCTCTTAGCACATTTCCCCCCTCCCAAGTCCCCTCAACCCCCAATGTAACCCTCAACCTCCCACAGCTCAGTAGCACACGTGCAACTAGTTAGTAACAACCCCCCTCCGTCCAGCTTCTCTTTCACACTGCTTAGAGTTCGGGTGCTACGAAATAGAACGCTCATAGTAGATGAAAAATTTCGTCAAAGCTAAAGCATTAATGCAGCATTTTGATATATATAAGATGCTTCAAGAAGAAAAAAAAAGTCTTGAACTTTTATTCTTTACACTTGAGTGTGTTTTAACATTCAAGCTAATCTGTTTAGTCAGTTTATAAACATCAAGCAACTGTTTGAATTTTATCATACGCAGCTAAACCAAACACACATTATTTATAGATAAGAA

Hybrid promoter P24

*Y. lipolytica GPDH Y. lipolytica ENO2 K. marxianus TAL1*

GTAGGTTGGGTTGGGTGGGAGCACCCCTCCACAGAGTAGAGTCAAACAGCAGCAGCAACATGATAGTTGGGGGTGTGCGTGTTAAAGGAAAAAAAAAGAAGCTTGGGTTATATTCCCGCTCTATTTAGAGGTTGCGGGATAGACGCCGACGGAGGGCAATGGCGCCATGGAACCTTGCGGATATCCATACGCCGCGGCGGACTGCGTCCGAACCAGCTCCAGCAGCGTTTTTTCCGGGCCATTGAGCCGACTGCGACCCCGCCAACGTGTCTTGGCCCACGCACTCATGTCATGTTGGTGTTGGGAGGCCACTTTTTAAGTAGCACAAGGCACCTAGCTCGCAGCAAGGTGTCCGAACCAAAGAAGCGGTCCCATCGGTAATCACGTGTGTGCCGATTTGCAAGACGAAAAGCCACGAGAATAAACCGGGAGAGGGGATGGAAGTCCCCGAACAGCAACCAGCCCTTGCCCTCGTGGACATAACCTTTCACTTGCCAGAACTCTAAGCGTCACCACGGTATACAAGCGCACGTAGAAGATTGTGGAAGTCGTGTTGGAGACTGTTGATTTGGCTCTTGCCCATCCATTTTACTCATTATATAATCTAGCTTTTGAAATATAGGAAATAGGTATATAAAGGATAGGAAAAAAAATTGTAATTGCAGAAAAAGAGGTGAACACGGTTAAAAACAGGTGAAAAACAGTTGTCAATTGTTGATGGATTGTTAGTAATTGATAGAATTTTCGATTAGAAATTGTCTATTACCAATTGAGAATAAACACCACCAAACGATACAAGA

Hybrid promoter P25

*S. cerevisiae PFK2 S. cerevisiae ZWF1 Y. lipolytica FBA1*

AAAACGAAGATTAAGATAAAGTTGGGTAAAATCCGGGGTAAGAGGCAAGGGGGTAGAGAAAAAAAAACCGGAGTCATTATATACGATACCGTCCAGGGTAAGACAGTGATTTCTAGCTTCCACTTTTTTCAATTTCTTTTTTTCGTTCCAAATGGCGTCCACCCGTACATCCGGAATCTGACGGCACAAGAGCCGATTAGTGGAAGCCACGGTTACGTGATTGCGGTTTTTTTTTCCTACGTATAACGCTATGACGGTAGTTGAATGTTAAAAACGAAAACAGAGATATTGAATTGATCAATTTGATCAGTACGTATGTAATCTTTTGTTTGCCATGTTAAATCGGCCTGAAATCACCACAAACTGTGTGTATCAAGTACATAGTGACATTTATATAATAGCAAGAACAACAATAATAGTAGCGCTACTGGAAGCACCACGTAATAGTGGAAAAGAACTGGAAAAACCGCTATAAGATGCATACTCCGGCGGTCTTACGCGGAGATACAAGCTTCCAACGGTGCTAAAAGCCCGGTAGTGTACTTCAATCGCCCCCTGGATATAGCCCCGACAATAGGCCGTGGCCTCATTTTTTTGCCTTCCGCACATTTCCATTGCTCGGTACCCACACCTTGCTTCTCCTGCACTTGCCAACCTTAATACTGGTTTACATTGACCAACATCTTACAAGCGGGGGGCTTGTCTAGGGTATATATAAACAGTGGCTCTCCCAATCGGTTGCCAGTCTCTTTTTTCCTTTCTTTCCCCACAGATTCGAAATCTAAACTACACATCACACA

Hybrid promoter P26

*Y. lipolytica GPDH O. polymorpha PSH1 O. polymorpha IDH2 Y. lipolytica GPDH*

GTTGGGGTTACGTAATTGCGGCATTTGGGTCCTGCGCGCATGTCCCATTGGTCAGAATTAGTCCGGATAGGAGACTTATCAGCCAATCACAGCGCCGAATCCACCTGTAGGTTGGGTTGGGTGGGAGCACCCCTCCACAGAGTAGAGTCAAACAGCAGCTCGCGACTCTCTGTCCGTTTCAGACTACACGAACATGCTTCTGGATGCCGTCAAGTTCCATAACCATGAGTTTGGCATGGTAGTTTTGGACAGAATGGCAAAGGAATCGCCGCGCAGCAACACCGAACTTCTCAGGGCTGTGTACGCCATAATCAAGTTTTACCTTGAGCTAGGGCGTCTGGACCTTGCGATGCATATACTAGAGCAGGTCAAGAAGGAAAGTATGGGGATGTGGCAAACGATTCCATCGTTCTTACCAGCTGACAGGTCACTGGAAGAGCAATAGGTCGCAAAAGAACTGCCAAATCCCGCCGGACTTTGACTACACTCCGATTAAGTTGTCGCGCGATACGTAGACTTTAGATGCCAATACGATGTGTGCTATGTTTATGTAAGCGGGTCGATCGACCCCTGTCTCGTTGTATGCTCGCCAACGCCCGGTCTTTTGCACCACATCAGGTTACCCCAAGCCAAACCTTTGTGTTAAAAAGCTTAACATATTATACCGAACGTAGGTTTGGGCGGGCTTGCTCCGTCTGTCCAAGGCAACATTTATATAAGGGTCTGCATCGCCGGCTCAATTGAATCTTTTTTCTTCTTCTCTTCTCTATATTCATTCTTGAATTAAACACACATCAACA

Hybrid promoter P28

*Y. lipolytica TEF1 Y. lipolytica ENO2 Y. lipolytica PFK1*

GGTATTTTCACAATTGCACCCCAGCCAGACCGATAGCCGGCCGCAATCCGCCACCCACAACCGTCTACCTCCCACAGAACCCCGTCACTTCCACCCTTTTCCACCAGATCATATGTCCCAACTTGCCAAATTAAAACCGTGCGAATTTTCAAAATAAACTTTGGCAAAGAGGCTGCAAAGGAGGGGCTGGTGAGGGCGTCTGGAAGTCGACCACAGAGCGGGTTGGCGGCGTGGCACCCCGGAAAAAAACAGCCCCAATTGCCCCAATTGACCCCAAATTGACCCAGTAGCGGGCCCAACCCCGGCGAGAGCCCCCTTCACCCCACATATCAAATGGGCGAGAAGGCGCGTAGATGTAGTCTTCCTCGGTCCCATCGGTAATCACGTGTGTGCCGATTTGCAAGACGAAAAGCCACGAGAATAAACCGGGAGAGGGGATGGAAGTCCCCGAACAGCAACCAGCCCTTGCCCTCGTGGACATAACCTTTCACTTGCCAGAACTCTAAGCGTCACCACGGTATACAAGCGCACGTAGAAGATTGTGGAAGTCGTGTTGGAGACTGTTGATTTGGGCGGTGGAGGGGGGTATTTGAGAGCAATCCTTAACTGTTGGTCGGTTGCCGTTTTTGCCTGCTCCTAACAGCTCGCACCGACTCTAAAAAACCTATACGACCTGGCCGGCGTAACTTTGAGTGTCGTCAAACTCTGATATATATATAGACACACGTATCCCAACAGTTGATAGTCGACAAACGCAAAACAGACGGACACTGAACCCCCCGCGCTTCAAAACACCGACA

Hybrid promoter P32

*S. cerevisiae ENO1 S. cerevisiae ZWF1 Y. lipolytica PFK1*

ATCGCGTTACCATATCGCCAAAAACTGATATACGCCGCGGAAACCAGGCAAACAATTGAAAAGAAAAATTTTGAGGAACTCTCTGCATCGAAGCCGTCTAGAGTTACCACTAGTCAGATGCCGCGGGCACTTGAGCACCTCATGCACAGCAATAACACAACACAATGGTTAGTAGCAACCTGAATTCGGTCATTGATGCATGCATGTGCCGTGAAGCGGGACAACCAGAAAAGTCGTCTATAAATGCCGGCACGTGCGATCATCGTGGCGGGGTTTTAAGAAAAGGATAACCCCTGTGTTGGGAGCACCTGGTAAGTAAGGTGTAGTTTTGCACCCGTGTACATAAGCGTGAAATCACCACAAACTGTGTGTATCAAGTACATAGTGACATTTAATTAATAGCAAGAACAACAATAATAGTAGCGCTACTGGAAGCACCACGTAATAGTGGAAAAGAACTGGAAAAACCGCTATAAGATGCATACTCCGGCGGTCTTACGCGGAGATACAAGCTTCCAACGGTGCTAAAAGCCCGGTTTCGGCTCGGCCGGAGGCGGTGGTTCAAACACCTCAGATCAGCTCACTATCGGCTGAGACAATCCTTAACTGTTGGTCGGTTGCCGTTTTTGCCTGCTCCTAACAGCTCGCACCGACTATAAAAAACCTATACGACCTGGCCGGCGTAACTTTGAGTGTCGTCAAACTCTGATATATATATAGACAGAGGTATCCCAACAGTTGATAGTCGACAAACGCAAAACAGACGGACACTGAACCCCCCGCGCTTCAAAACACCGACA

Hybrid promoter P34

*Y. lipolytica STL1 K. marxianus MDH1 Y. lipolytica GND2*

TAAGTAGGCTTTTGAGTTTCCGTCTTTTTCGCAAAGTGAAAAAAGGTGGGATAATCCGGGGTGCCGTACATTTGGAGAAGGTGGTAATATAACCGAATAGTTGGCCAATATGAGCCGCGAAAATCGGAATCAAGTCGCCAACGTCTACTCATTTTATTCCAGATCTCAGATTCTTTCTAGCACATCTATAGGCCCTAATAACTGCGTCCCCTTCGAGCTATAACATTTAAGGTGCAAAGAGAGGTTGGGAAGACAGCCTAAGGATTAGGGAGAGGTTTTGCTGCGTGGGGGAACCGAGGGAGGGAATCCTCTGGAAGCCGGACCTTGCCCTTTTGACTAGGGTACTACTCTGGGCAGGGTACTTACTAAACTGGGCCCAGACAGACAGAGGCCCAGACAGAGGCCCCAAAGAGAAGCCGCCAGGTTCCCTGCCTAGGCCTTCCTCTGGTTGCCCCCCAGAGTACCCTCCGGAACGAAACGAAACGAAAACGCACATCGTGATGCGCGCTATTATAATTGCGTCTTGCGAATTCCATACGCCATGCGCTTAGTTAGCACATGAAATCCTGCCAATATTGACAATCCAACTTCCCAATTCCATTCCGATGACTAAAGTTTGAGCGTTTAATCCGCCAAATGACCACACTGTATATAAACTCGATTGCCAGCGAAATAGAGTTGCTTTACTAAGCACAAAGTCTGTTGAGTTGGCTGAGACTTGGATTTATAAAAGGCTGCAGCGTCCCTCTCCAGACCTTTTCTGCAACTTGACATTTTCTTGTTAACGACACCATCACACA

Hybrid promoter P36

*S. cerevisiae ZWF1 K. phaffii PGK1 Y. lipolytica ADH1*

CCCGCCCGCTTTCGCTAGAGTACGTCTTCGCGCCCGTCAAGCAGGCCGTCGAAAAGGATCTAGCCCCTGTTGGGAGCACCTGGTAAGTAAGGTGTAGTTTTGCACCCGTGTACATAAGCGTGAAATCACCACAAACTGTGTGTATCAAGTACATAGTGACTTTTAAATAATAGCAAGAACAACAATAATAGTAGCGCTACTGGAAGCACCACGTAATAGTGGAAAAGAACTGGAAAAACCGCTATAAGATGCATACTCCGGCGGTCTTACGCGGAGATACAAGCTATGTTTATTTTTCGTCCAACCTAATTGTGGTTTCAAAGCGCTATCAGGTGGGGGGTAAGAGGAATGTGAGTGGAAAGCGAAAATAACTGGCAGCTGGGGTCAGATCCCGTGATGCCACCTCTTGTGGTATTTTGAAACGCGTGTTGCGATTGGCCGCGAGAACGGAAAGGAATATATTTACTGCCGATCGCATTTTGGCCTCAAATAAATCTTGAGCTTTTGGACATAGATTATATGTTCTTTCTGCAATTGCACAATCGCAGACGGTGGAGATTGTCGGGTGACGCACGTACACATACAGTATCGCCTGTACCACCCTACCCAGCACGTCAACTGCAGCTGTTCAACAGACGTCGAACCCCCACCATCTCAAAGATGACAGGAGACAAGGAGACAGACTTTCTATCGTTTTTGAACCCTATTATTTCTGCCTCTTGCCTTATATAAAGGTCGGTCAGAGCGCCCTCTTATCATGGTCCCCACTTCCAATCCCTACTTCTACACCAGCATCAAAA

Hybrid promoter P37

*Y. lipolytica PGK1 Y. lipolytica FBA1 Y. lipolytica ENO2*

CAGACAGTGACGAGTCATACATTCTCCGTATAATATCGTGTATGTCCAGACGAAATGGTATGGATATGCACGGGGCGTAACTACTGTGCGAGTACTCGTGCATGTATCGTAGGTATTGTATGTTCGAGTACATACACATACGATACCAAACACTGCCCACTGTTCTGTCATGTTAGATCATGGCCAATCCACGTGACTTGCATGCAGGTTTGGCATTGAATATTCAGCGTGGCTACTACAAGTAGTACATACTGTATCAATACGATTGTACATACGGTACTCACCCTTTGCTACATCACGTGTGTACAAGGGCGCACATGGCAGGCGCTGAGGTCGAGCAGGGTGGTGTGACTTGTTATAGCCTTTAGAGCTGCGAAAGCGCGTATGGATTTGGCTCATCAGGCCAGATTGAGGGTCTGTGGACACATGTCATGTTAGTGTACTTCAATCGCCCCCTGGATATAGCCCCGACAATAGGCCGTGGCCTCATTTTTTTGCCTTCCGCACATTTCCATTTGAGATTTGTGCCATTGAGGGGGAGGTTATTGTGGCCATGCAGTCGGATTTGCCGTCACGGGACCGCAACATGCTTTTCATTGCAGTCCTTCAACTATCCATCTCACCTCCCCCAATGGCTTTTAACTATATAAAGACGAAAGCACCCCCCTTTGTACAGATGACTATTTGGGACCAATCCAATAGCGCAATTGGGTTTGCATCATGTATAAAAGGAGCAATCCCCCACTAGTTATAAAGTCACAAGTATCTCAGTATACCCGTCTAACCACACATTTATCACA

Hybrid promoter P38

*O. polymorpha SDH1 O. polymorpha PGI1 Y. lipolytica ENO2*

CTCGCGACGGCGGACATTGGTGTCGCCATGGGCTCGGGGTCGGATCTGGCCTTGAGCTCGTGCGATTTTGTCCTTTTGTCGCAGAAACAGCCACTCAAGCAGCTGCAAATCCTGCTCCAGCTGTCGCACAAAGTGATCAACCGTGTCAAATTCAACTTTGGCTGGGCACTGGTCTACAATGTGATTGGAATCCCGATCGCTGCAGGGGTTATTTATCCGTACCATAACTCGCGTCTGAGTCCTACGTGGTCGAGTTTAGCCATGGCTTGTTCGAGCGTGAGTGTTTTATGCAGCAGTCTGGCACTCAGATGGGATAATCAGCAGTCTTTTTCGGAATTTGAAAATGTTTGGACGGACTACGAAAATAAGGAGTTTGATATTAATGAGAGTAAGTTTTTCAATGCAATGGAAGAGAAGAACGAAGCTGCAGAAGAGCAAATAGACGCTTTGAAACAGCAGATCTTGAACATGGATGCATACACCAAACAGCTCTGGGAGCAAGCAAAGTCGTCCTGGAAGTCCGGAAAATAGCCGCACAGCCCGGACGGTTTCTTGCGGAGAACAGTTGCCGTCACGGGACCGCAACATGCTTTTCATTGCAGTCCTTCAACTATCCATCTCACCTCCCCCAATGGCTATAAAAGTTCGAATGACGAAAGCACCCCCCTTTGTACAGATGACTATTTGGGACCAATCCAATAGCGCAATTGGGTTTGCATCATGTATAAAAGGAGCAATCCCCCACTAGTTATAAAGTCACAAGTATCTCAGTATACCCGTCTAACCACACATTTATCACA

Hybrid promoter P43

*Y. lipolytica PGK1 K. marxianus TAL1 K. lactis GPDH*

CAGACAGTGACGAGTCATACATTCTCCGTATAATATCGTGTATGTCCAGACGATAGTCGTACTCGTACTCGTTACTGTAACTACTGTGCGAGTACTCGTGCATGTATCGTAGGTATTGTATGTTCGAGTACATACACATACGATACCAAACACTGCCCACTGTTCTGTCATGTTAGATCATGGCGGGGCCACGTGACTTGCATGCAGGTTTGGCATTGAATATTCAGCGTGGCTACTACAAGTAGTACATACTGTATCAATACGATTGTATTTCCAATCCAGATTCTACGGGACATAACAACAGCAACACCCACGATCCCACGCATATTTATTTCTTCTGTATCAGCTAGACTTTTTGTTCTCCTCACTGCTTGCTAGAGGCAGACAGACGTGTACAGCATTTGTAATCATTTATGACCTACTAGAAACAAAAAATAAAAAAAGGCATCAAAAAGCACACTACATTACATACACATGTATATACTACGAGCCAAGCCAAGGCAAAGTAGGCCAGGGTAAGGTATGGTAAGGTAAGCGGCGGTATGCCCCACAGCCCTTAGCAATTCCAGAAGTATCTGCACATAATGTGGTTATGTTCCAATATAGGTACCACCTTTGTTCAAGATTTAGTTTTCTAATTGAATATAAATACAGAGGTTATTTCAACCTAATTGAGATTAAGGAGAGACTTATTTTACTATAGTATATATTTATATATAATTACTTATTGTTACTCCAATCCCCAAGTAGATTAGATTTAATCAATCACACACAAACATCAAAACAACAAATTAACAAAA

Hybrid promoter P45

*Y. lipolytica ENO2 Y. lipolytica GPDH Y. lipolytica ACO1 Y. lipolytica ENO2*

TTCAGGCGGCTACTTGTATGTAGCATCCACGTTCATGTTTTGTGGATCAGATTAATGGTATGGATATGCACGGTTGAAATGAATCGGCCGACGCTCGGTAGTCGGAAAGAGCCGGGACCGGCCGGCGAGCATAAACCGGACGCAGTAGGATGTCCTGCACGGGTCTTTTTGTGGGGTGTGGAGAGGGGGGTGCTTGGAGATGGAAGCCGGTAGAACCGGGCTGCTTGGGGGGATTTGGGGCCGCTGGGCTCCAAAGAGGGGTAGGCATTTCGTTGGGGTTACGTAATCCGCACCGAAGTGACAACATGGACAATGTGACACGTAGATACACGCAGGAAGCAGCTGTCCACACACATTTATCCCGAAAAATAGCCCGCATCACATGCACGACTCGTAAAAAGAAAAGAGCTGCGGGCCAAAGGACCAATAAGTGCCGAGGAATGTTAAGCCAAAAGAACAACGACGATCGCCAGACAGGTTTAGTGGGAGCAGCAGCAGCAGAGGCCGTGCAACGGCAGGAGAGAGAGGTCTGGCGAAAAGGAGGACAGGGGCCATGCAGTCGGATTTGCCGTCACGGGACCGCAACATGCTTTTCATTGCAGTCCTTCAACTATCCATCTCACCTCCCCCAATGGCTTTTAACTTTCGAATGACGAAAGCACCCCCCTTTGTACAGATGACTATTTGGGACCAATCCAATAGCGCAATTGGGTTTGCATCATGTATAAAAGGAGCAATCCCCCACTAGTTATAAAGTCACAAGTATCTCAGTATACCCGTCTAACCACACATTTATCACA

Hybrid promoter P46

*K. phaffii CYC1 Y. lipolytica GPDH Y. lipolytica ZWF1 K. phaffii CYC1*

TCAATAAGGTTTTTGACAGTCTAAAACTTTCTATAACGAGTATGCCTTACATCTTGAAACGATGGCTTGGACCAGACCGAGGAGTAGCCGACGCTCGGTAGTCGGAAAGAGCCGGGACCGGCCGGCGAGCATAAACCGGACGCAGTAGGATGTCCTGCACGGGTCTTTTTGTGGGGTGTGGAGAGGGGGGTGCTTGGAGATGGAAGCCGGTAGAACCGGGCTGCTTGGGGGGATTTGGGGCCGCTGGGCTCCAAAGAGGGGTAGGCATTTCGTTGGGGTTACGTAATTGCGGCATTTGGGTCCTGCGCGCATGTCCCATTGGTCAGAATTAGTCCGGATAGGAGACTTATCAGCCAATCACAGCCTGCGTACCACCTGTAGGTGCGATAGTTCACCAGTCACGCTGGTGGGCCATTCTCTTAGCACATTTCCCCCCTCCCAAGTCCCCTCAACCCCCAATGTAACCCTCAACCTCCCACAGCTCAGTAGCACACGTGCAACTAGTTAGTAACAACCCCCCTCCGTCCAGCTTCTCTTTCACACTGCTTAGAGTTCGGGTGCCAACGTTGCCAAACTACCCTGACGTGCTAACAAAGGAAAGCGTTTTAACTGTAAGCTATCAGATTACATAAGACCTGTCCGCGATCGCCCGATCTCAGAGTTCCCACAAGAGCCAATAAAATCGCGCGAATTTGAAATCGGAAAATGTAGGAACTCAATTGTCCTATATAAATAATTCCCTTCCCGTGGAAACTGAAAAAAAAGTTCACCCCGACTTATTTATTCAATTCAACACAAAA

Hybrid promoter P47

*S. cerevisiae PGK1 Y. lipolytica GPDH S. cerevisiae PGK1 K. phaffii ADH1*

GCAAGAATTACTCGTGAGTAAGGAAAGAGTGAGGAACTATCGCATACCTGCATTTAAAGATGCCGATTTGGGCGCGAAATGAATCGGCCGACGCTCGGTAGTCGGAAAGAGCCGGGACCGGCCGGCGAGCATAAACCGGACGCAGTAGGATGTCCTGCACGGGTCTTTTTGTGGGGTGTGGAGAGGGGGGTGCTTGGAGATGGAAGCCGGTAGAACCGGGCTGCTTGGGGGGATTTGGGGCCGCTGGGCTCCAAAGAGGGGTAGGCATTTCGTTGGGGTTACGTAATTGCGGCATTTGGGTCCTGCGCGCATGTCCCATTGGTCAGAATTAGTCCGGATAGGAGACTTATCAGCCAATGGCGGGAAAGGGTTTAGTACCACATGCTATGATGCCCACTGTGATCTCCAGAGCAAAGTTCGTTCGATCGTACTGTTACTCTCTCTCTTTCAAACAGAATTGTCCGAATCGTGTGACAACAACAGCCTGTTCTCACACACTCTTTTCTTCTAACCAAGGGGGTGGTTTAGTTTAGTAGAACCTCGTGAAACTTACATTTACATATATATAAACTTGCATAAATTGGTCAATGCAAGAAATACATATTTTGCCTATTGTAGACGTCAACCCGCATCTGGTGCGAATATAGCGCACCCCCAATGATCACACCAACAATTGGTCCACCCCTCCCCAATCTCTAATATTCACAATTCACCTCACTATAAATACCCCTGTCCTGCTCCCAAATTCTTTTTTCCTTCTTCCATCAGCTACTAGCTTTTATCTTATTTACTTTACGAAA

Hybrid promoter P50

*Y. lipolytica MDH1 K. lactis PFK2 K. phaffii AOX1*

GTTCCGGCTCCGATTTCTCGGCCAAGTGCCGACTCCACAAGACCGAGGAAGGTAAACTCTCTGTTCACGTGGGGCTGAAGAAAGGCCAGCTCACGGTGGTGGAGTTGCAATGGAGGCGGCAGCTGAATAGACCTTGCAAGTAAGGGGTACCTGACGGGAATGTGGGAATATGGGACACAAATTGGGGGGCAAACTTGCAACATGCGTCCAGTGTACCCCGGATAACACCATTAGTGTGGCTAATAGCGAGGATGGGGACTTGGAGGGATGGGTTCGCAGGGATGGACTCGGAGGGATGGACGCGAATGGCGTGGAGGGCTCGGATGGCGCGGAGGGTTCGGAGATGGGTCCAGGGCCAAAAATCCGGTTTAAAAAGGTGGATATGGTCGATTGTAGTGGAAGCTCGTGATCCTACATGCTCACGAAACCCATCATCATGCAATCCACATTAAAGGAAGGGAAAAGGATATTGAACTTTTGACTATTTAGTATAAATGAAAACTACTTTGTAAGCTTGGACAGAGGAATAATTTCTGATTCGTGCTTCTGCTTCTACTGACTTGCAAACCAGTAAACAAGTTACTGCATTAATCAGTAATAATCTGCGTATAGCGAAACTTGTAACCCTACTTGACAGCAATATATAAACAGAAGGAAGCTGCCCTGTCTTAAACCTTTTTTTTATCATCATTATTAGCTTACTTTCATAATTGCGACTGGTTCCAATTGACAAGCTTTTGATTTTAACGACTTTTAACGACAACTTGAGAAGATCAAAAAACAACTAATTATTCGAAACA

Hybrid promoter P55

*Y. lipolytica ENO2 O. polymorpha PYK1 S. cerevisiae PGK1*

ATCACGCTACACTTAGCTACAGAATAAAGCTCGGTAGCGCCAACAGCGTTGACAAATAGCTCAAGGGCGTGGAGCACAGGGTTTAGGAGGTTTTAATGGGCGAGAAGGCGCGTAGATGTAGTCTTCCTCGGTCCCATCGGTAATCACGTGTGTGCCGATTTGCAAGACGAAAAGCCACGAGAATGGGGCGGGAGAGGGGATGGAAGTCCCCGAACAGCAACCAGCCCTTGCCCTCGTGGACATAACCTTTCACTTGCCAGAACTCTAAGCGTCACCACGGTATACAAGCGCACGTAGAAGATTGTGGAAGTTGAGCTCGTGTTGGAATTTCAGTATAAGCGATTCCGTCAGACTCACTGCATCTGGGTCAGAGGGAGGCTTTAGGACAGGAGCCATCTGTACAGAGGCTACGGAGTGTGGTGGCGGGTTCATGGGTGGCTCAAGCGGTCTAAAAGCAAAGGTGCGCGGCCGTACGTTATTGTTTGTGTGGGTACGCGATAAATAAAAAATCAGACAATCGGCTATGGGGGTGACATAAGCGATGAGCAAACTCTATAGCCTCGGCAAACCTGGGCGTGCACACACTCTTTTCTTCTAACCAAGGGGGTGGTTTAGTTTAGTAGAACCTCGTGAAACTTACATTTACATATATATAAACTTGCATAAATTGGTCAATGCAAGAAATACATATTTGGTCTTTTCTAATTCGTAGTTTTTCAAGTTCTTAGATGCTTTCTTTTTCTCTTTTTTACAGATCATCAAGGAAGTAATTATCTACTTTTTACAACAAATATAAAACA

Hybrid promoter P62

*S. cerevisiae TEF1 K. lactis TEF1 Y. lipolytica TEF1*

AGGTCTTTAGTCAGAGGCAGGAACAGCCGTCAAGGGGGCATAAGACTACGGTCATCCCCATCTGCCTCTTCGTCCAGCCTTGCCAACAGGGAGTTCTTCAGAGACATGGAGGCTCAAAACGAAATTATTGACAGCCTAGACATCAATAGTCATACAACAGAAAGCGACCACCCAACTTTGGCTGGGGGTAGCGTATAAACAATGCATACTTTGTACGTTCAAAATACAATGCAGTAGATATATTTATGCATATTACATATAATACATATCACATAGGAATGGACAGACAACTATACCAGCATGGATCTCTTGTATCGGTTCTTTTCTCCCGCTCTCTCGCAATAACAATGAACACTGGGTCAATCATAGCCTACACAGGTGAACAGAGTAGCGTTTATACAGGGTTTATACGGTGATTCCTACGGCAAAAATTTTTCATTTCTAAAAAGAAAAAGAAAAATTTTTCTTTCCAACGCTAGAAGGAAAAGAAAAATCTAATTAAATTGATTTGGTGATTTTCTGAGAGTTCCCACACTTGCCGTTAAGGGCGTAGGGTACTGCAGTCTGGAATCTACGCTTGTTCAGACTTTGTACTAGTTTCTTTGTCTGGCCATCCGGGTAACCCATGCCGGACGCTATATAAGCTACTGAAAATTTTTTTGCTTTGTGGTTGGGACTTTAGCCAAGGGTATAAAAGACCACCGTCCCCGAATTACCTTTCCTCTTCTTTTCTCTCTCTCCTTGTCAACTCACACCCGAAATCGTTAAGCATTTCCTTCTGAGTATAAGAATCATTCAAA

Hybrid promoter P67

*Y. lipolytica TEF1 Y. lipolytica TEF1 C. hispaniensis TEF1 Y. lipolytica TEF1*

TTCGCTCCCACACTACACCGTAATACCACGTCACTCTCATTGCAGGTTACCCTGCCCGTAGTCGCTCGATCCACCTCCTCCTTCTCTCGTGTGTGCAGCAAAGAGGCAGAGATGGAGCCCGTATGGTGAATTAAAACCGTGCGAATTTTCAAAATAAACTTTGGCAAAGAGGCTGCAAAGGAGGGGGGGGTGAGGGCGTCTGGAAGTCGACCAGACAGCGGGTTGGCGGCGTATTTGTGTCCCAAAAAACAGCCCCAATTGCCCCAAGTCCACCACCACTGGACACTTGATTTACAAGTGCGGTGGTATGGATAAGCGAACCATTGAAAAGTTTGAGAAGGAAGCCGATGAGCTTGGAAAGGGTTCTTTCAAGTACGCTTGGGTTCTTGACAAGTTGAAGGCTGAGCGAGAGCGAGGTATCACCATTGATATTGCTCTCTGGAAGTTCGACACGCCCAAGTACTACGTTACCATTATTGATGCTCCCGGTCACCGAGATTTCATCAAGAATATGATTACCGGTACTTCCCCACACTTGCCGTTAAGGGCGTAGGGTACTGCAGTCTGGAATCTACGCTTGTTCAGACTTTGTACTAGTTTCTTTGTCTGGCCATCCGGGTAACCCATGCCGGACGCTATATAAGCTACTGAAAATTTTTTTGCTTTGTGGTTGGGACTTTAGCCAAGGGTATAAAAGACCACCGTCCCCGAATTACCTTTCCTCTTCTTTTCTCTCTCTCCTTGTCAACTCACACCCGAAATCGTTAAGCATTTCCTTCTGAGTATAAGAATCATTCAAA

Hybrid promoter P68

*S. cerevisiae TEF1 C. hispaniensis TEF1 Y. lipolytica TEF1*

AGGTCTTTAGTCAGAGGCAGGAACAGCCGTCAAGGGGGCATAAGACTACGGTCATCCCCATCTGCCTCTTCGTCCAGCCTTGCCAACAGGGAGTTCTTCAGAGACATGGAGGCTCAAAACGAAATTATTGACAGCCTAGACATCAATAGTCATACAACAGAAAGCGACCACCCAACTTTGGCTGGGGGTAGCGTATAAACAATGCATACTTTGTACGTTCAAAATACAATGCAGTAGATATATTTATGCATATTACATATAATACATATCACATAGGAAGCAACACTTGATTTACAAGTGCGGTGGTATGGATAAGCGAACCATTGAAAAGTTTGAGAAGGAAGCCGATGAGCTTGGAAAGGGTTCTTTCAAGTACGCTTGGGTTCTTGACAAGTTGAAGGCTGAGCGAGAGCGAGGTATCACCATTGATATTGCTCTCTGGAAGTTCGAGAGGCCCAAGTACTACGTTACCATTATTGATGCTCCCGGTCACCGAGATTTCATCAAGAATATGATTACCGGTACTTCCCCACACTTGCCGTTAAGGGCGTAGGGTACTGCAGTCTGGAATCTACGCTTGTTCAGACTTTGTACTAGTTTCTTTGTCTGGCCATCCGGGTAACCCATGCCGGACGCTATATAAGCTACTGAAAATTTTTTTGCTTTGTGGTTGGGACTTTAGCCAAGGGTATAAAAGACCACCGTCCCCGAATTACCTTTCCTCTTCTTTTCTCTCTCTCCTTGTCAACTCACACCCGAAATCGTTAAGCATTTCCTTCTGAGTATAAGAATCATTCAAA

Hybrid promoter P73

*S. cerevisiae TEF1 K. lactis TEF1 K. phaffii AOX1*

AGGTCTTTAGTCAGAGGCAGGAACAGCCGTCAAGGGGGCATAAGACTACGGTCATCCCCATCTGCCTCTTCGTCCAGCCTTGCCAACAGGGAGTTCTTCAGAGACATGGAGGCTCAAAACGAAATTATTGACAGCCTAGACATCAATAGTCATACAACAGAAAGCGACCACCCAACTTTGGCTGGGGGTAGCGTATAAACAATGCATACTTTGTACGTTCAAAATACAATGCAGTAGATATATTTATGCATATTACATATAATACATATCACATAGGAAGCAACAGACAACTATACCAGCATGGATCTCTTGTATCGGTTCTTTTCTCCCGCTCTCTCGCAATAACAATGAACACTGGGTCAATCATAGCCTACACAGGTGAACAGAGTAGCGTTTATACAGGGTTTATACGGTGATTCCTACGGCAAAAATTTTTCATTTCTAAAAGAAAAAAGAAAAATTTTTCTTTCCAACGCTAGAAGGAAAAGAAAAATCTAATTAAATTGATTTGGTGATTTTCTGAGAGTTCCCTTTTTCATATATCGAATTTTGAATATAAAAGGAGATCGAAAAAATTTTTCTATTCAATCTGTTTTCTGGTTTTATTTGATAGTTTTTTCTAACCCCTACTTGACAGCAATATATAAACAGAAGGAAGCTGCCCTGTCTTAAACCTTTTTTTTATCATCATTATTAGCTTACTTTCATAATTGCGACTGGTTCCAATTGACAAGCTTTTGATTTTAACGACTTTTAACGACAACTTGAGAAGATCAAAAAACAACTAATTATTCGAAACA

Hybrid promoter P78

*S. cerevisiae TEF1 K. phaffii TEF1 S. cerevisiae HXT7*

TGAGGTCTTTAGTCAGAGGCAGGAACAGCCGTCAAGGGGGCATAAGACTACGGTCATCCCCATCTGCCTCTTCGTCCAGCCTTGCCAACAGGGAGTTCTTCAGAGACATGGAGGCTCAAAACGAAATTATTGACAGCCTAGACATCAATAGTCATACAACAGAAAGCGACCGCCCAACTTTGGCGGGGAATAGCGTATAAACAATGCATACTTTGTACGTTCAAAATACAATGCAGTAGATATATTTATGCATATTACATATAATACATATCACATAGGAAGCAACAGGCGCGTTGGCCTCCTTCACCTTTTAACCATCTTGCCCATTCCAACTCGTGTCAGATTGCGTATCAAGTGAAAAAGAAAAAATTTTAAATCTTTAACCCAATCAGGTAATAACTGTCGCCTCTTTTATCTGCCGCACTGCATGAGGTGTCCCCTTAGTGGAAAAGAATACTGAGCCAACCCTGGAGGACAGCAAGGGAAAAATACCTACAACTTGCTTCATAATGGTCGTAAAAACAATCCTTGTCGGATATAAGTGTTGTAGACTGTCCCTTATCCTCTGCGATGTTCTTCCTCTCAAAGTTTGCGATTTCTCTCTATCAGAATTGCCATCAAGAGAAAAAAAAGTATAAATAGACACCATATATGCCAATACTTCACAATGTTCGAATCTATTCTTCATTTGCAGCTATTGTAAAATAATAAAACATCAAGAACAAACAAGCTCAACTTGTCTTTTCTAAGAACAAAGAATAAACACAAAAACAAAAAGTTTTTTTAATTTTAATCAAAAA

Hybrid promoter P88

*Y. lipolytica TEF1 K. marxianus TEF1 Y. lipolytica TEF1*

GGTATTTTCACAATTGCACCCCAGCCAGACCGATAGCCGGCCGCAATCCGCCACCCACAACCGTCTACCTCCCACAGAACCCCGTCACTTCCACCCTTTTCCACCAGATCATATGTCCCAACTTGCCAAATTAAAACCGTGCGAATTTTCAAAATAAACTTTGGCAAAGAGGCTGCAAAGGAGGGGGGGGTGAGGGCGTCTGGAAGTCGACCACACAGCGGGTTGGCGGCGTATTTGTGTCCCAAAAAACAGCCCCAATTGCCCCAATTGACCCCAAATTGACCCAGTAGCGGGCCAGCGTATCCCAGCCTAGTGTATCCCAGCCTAGCCTAGCCTAGGCCAAACCTAGCCCTCTCTAGCCTAGCGCCCAGCAGAAACACCGATGAAGCAAAGAAGTAACAGCAGGAAAGAAAAACAAACACAACAAAAAAAAACAAGCAGCATAGCATCAACAGAAATTTCTAAAGAGAACCAAATTCACCCCAGAAACAACCGCACAAATACGACATCCATCCACCTTTCTTTTATCCCACACTTGCCGTTAAGGGCGTAGGGTACTGCAGTCTGGAATCTACGCTTGTTCAGACTTTGTACTAGTTTCTTTGTCTGGCCATCCGGGTAACCCATGCCGGACGCTATATAAGCTACTGAAAATTTTTTTGCTTTGTGGTTGGGACTTTAGCCAAGGGTATAAAAGACCACCGTCCCCGAATTACCTTTCCTCTTCTTTTCTCTCTCTCCTTGTCAACTCACACCCGAAATCGTTAAGCATTTCCTTCTGAGTATAAGAATCATTCAAA

Hybrid promoter P89

*S. cerevisiae TEF1 K. marxianus TEF1 Y. lipolytica TEF1*

AGGTCTTTAGTCAGAGGCAGGAACAGCCGTCAAGGGGGCATAAGACTACGGTCATCCCCATCTGCCTCTTCGTCCAGCCTTGCCAACAGGGAGTTCTTCAGAGACATGGAGGCTCAAAACGAAATTATTGACAGCCTAGACATCAATAGTCATACAACAGAAAGCGACCACCCAACTTTGGCTGGGGGTAGCGTATAAACAATGCATACTTTGTACGTTCAAAATACAATGCAGTAGATATATTTATGCATATTACATATAATACATATCACATAGGAAGCAACAGGCGCCATCCCAGCGTATCCCAGCCTAGTGTATCCCAGCCTAGCCTAGCCTAGGCCAAACCTAGCCCTCTCTAGCCTAGCGCCCAGCAGAAACACCGATGAAGCAAAGAAGTAACAGCAGGAAAGAAAAACAAACACAACAAAAAAAAACAAGCAGCATAGCATCAACAGAAATTTCTAAAGAGAACCAAATTCACCCCAGAAACAACCGCACAAATACGACATCCATCCACCTTTCTTTTATCCCACACTTGCCGTTAAGGGCGTAGGGTACTGCAGTCTGGAATCTACGCTTGTTCAGACTTTGTACTAGTTTCTTTGTCTGGCCATCCGGGTAACCCATGCCGGACGCTATATAAGCTACTGAAAATTTTTTTGCTTTGTGGTTGGGACTTTAGCCAAGGGTATAAAAGACCACCGTCCCCGAATTACCTTTCCTCTTCTTTTCTCTCTCTCCTTGTCAACTCACACCCGAAATCGTTAAGCATTTCCTTCTGAGTATAAGAATCATTCAAA

Hybrid promoter P92

*O. polymorpha ZWF1 Y. lipolytica PFK1 O. polymorpha TAL1*

GTTGAGCACGACGCGACCCCGATCTCGCACATCTATGAGCAGTATGCGCCCCGGGACTGGCCCGATGCGGAGGCGGCATGGCTCAACTGCGAAGGCTCGTCGTCAGGAGGGTATGCGCTCCAGTATTTATTGCACTTGCAAAAAAAGCACGAAAACACAGAGATCAGGACGATAAACGGCAGAAGGGGGGACATTTACGAGCTGCGGCTTGTGAGCGGGTCCGAGGTGTCTACTTGGTCCTGGTACTACACTCGTACCGGTACCTTTTGATCCGATGGTTACTTTTTATGTTCTATTTTACATTAGCGTGGAAATAGACCATGCCATCTTTGGCACCCCGGAAAAACTTGATCCAATAGAGTTGTTGGGTGGAGCTAGTGACTGGCGGCAATTGGAGAGCTTCTAGAAGACGAACCAGGAGCCCGATAGGAACTCCGTTGGCGTGAGTCGGCCCCCCAGTAGCAATTCGAATCACGTGACGTGGAGTTTTCCCTCGCCCGCGTTCCTGGATTGTCCCAGCTGGCTCCTAAAATGGAAATGCATGTGGCAAAGTAATGGCTCCTAGGGTGGACTTCAAGGATACACTCACATTGATTGGTTGACAAGGTTACGTAAACTTGTCTCCGAAGACGAATTTGTTTACGAAGATAGCATTTATTTGTAGGTTATTGATTAGGTAAGATTTATTCAACGCAAACTGGGTGATGAATATAAATAAGCTCGGGTATTCCTCCGCAACCAGAACTTGAATTATATACGTTTCGATTGATTTCCATCAAATTATAAATTCAACAATTGCA

Hybrid promoter P94

*Y. lipolytica GPDH O. polymorpha PGI1 O. polymorpha TAL1*

GTAGGTTGGGTTGGGTGGGAGCACCCCTCCACAGAGTAGAGTCAAACAGCAGCAGCAACATGATAGTTGGGGGTGTGCGTGTTAAAGGAAAAAAAAAGAAGCTTGGGTTATATTCCCGCTCTATTTAGAGGTTGCGGGATAGACGCCGACGGAGGGCAATGGCGCCATGGAACCTTGCGGATATGGGGACGCCGCGGCGGACTGCGTCCGAACCAGCTCCAGCAGCGTTTTTTCCGGGCCATTGAGCCGACTGCGACCCCGCCAACGTGTCTTGGCCCACGCACTCATGTCATGTTGGTGCGGCTTGCACGGGATAATCAGCAGTCTTTTTCGGAATTTGAAAATGTTTGGACGGACTACGAAAATAAGGAGTTTGATATTAATGAGAGTAAGTTTTTCAATGCAATGGAAGAGAAGAACGAAGCTGCAGAAGAGCAAATAGACGCTTTGAAACAGCAGATCTTGAACATGGATGCATACACCAAACAGCTCTGGGAGCAAGCAAAGTCGTCCTGGAAGCTGGCTCCTAAAATGGAAATGCATGTGGCAAAGTAATGGCTCCTAGGGTGGACTTCAAGGATACACTCACATTGATTGGTTGACAAGGTTACGTAAACTTGTCTCCGAAGACGAATTTGTTTACGAAGATAGCATTTATTTGTAGGTTATTGATTAGGTAAGATTTATTCAACGCAAACTGGGTGATGAATATAAATAAGCTCGGGTATTCCTCCGCAACCAGAACTTGAATTATATACGTTTCGATTGATTTCCATCAAATTATAAATTCAACAATTGCA

Hybrid promoter P95

*S. cerevisiae TEF1 Y. lipolytica ZWF1 K. phaffii PYK1*

TATTTTCACAATTGCACCCCAGCCAGACCGATAGCCGGCCGCAATCCGCCACCCACAACCGTCTACCTCCCACAGAACCCCGTCACTTCCACCCTTTTCCACCAGATCATATGTCCCAACTTGCCAAATTAAAACCGTGCGAATTTTCAAAATAAACTTTGGCAAAGAGGATGATAAGGAGGGGGGGGTGAGGGCGTCTGGAAGTCGACCACACACGGGGTTGGCGGCGTATTTGTGTCCCAAAAAGCAGCCCCAATTGCCCCAATTGACCCCAAAGCCCTACGTCTGGACCGCTACATTATTTCATAGCACAGCAACAGAACCGAGTTTAATGGTTTGAAACCTAGGTGGAAGAGGGGCGGGCGAGGTATCGTACTGTGGGTGCGATAGTTCACCAGTCACGCTGGTGGGCCATTCTCTTAGCACATTTCCCCCCTCCCAAGTCCCCTCAACCCCCAATGTAACCCTCAACCTCCCACAGCTCAGTAGCACACGTGCAACTAGTTAGTAACAACCCCCCACCGTCCAGCTTCCGTACGTTTTTCACATTCAAGGATGAGGGTTTTCCACGAGTGAACTATTACTCCGGACCCCCACCATCATTTGCGGAATGAAACCTTTTGTGCTGAGATTATATAAGGCGTGGGGACGGACGCTTCTTAACCGTTCCCCTAGAATGTCGTCCCCTGATCAAAATTTAATGGCATCCAACTTTGCTGTAATAGGTATATATAACCTAGCAGGCGACCGTTCATGTACAGTAAATTGTTTTAGACTTTTTTTTAACTGAAATCAATCCA

Hybrid promoter P96

*K. phaffii TPI1 Y. lipolytica TPI1 Y. lipolytica GND2*

CGAAATATACCACATTGCCAGTTTATACAGATGGTTAAGGGTGAAAATCAACGTTACACCTTGACGACCCCATTATTACGATGGCGTGAAGGAGATGAAGACCGGGTAGAAGAAATAAGAAAAGCGGTACAGTTTAGGTCCGGAGATCTAGGGAAGGAGGCCTTAGCTTATATTGTAGCTGCTGGGGGAGAGGCAGCTGCTGGAAGATCTGAAGGCCCTATCACGTATGATGATGGTGATGACCATTAGAGAACGCCCAGAGATTGATAGCCAGGTGACTCAGAAAGTGCATGTTGGAAATGAGCCACAGACCAAGACAAGATATGACAAAATTGCACTATTCGATGCAGAATTCGACGGTGTTTCCATTGGTGTTATGACATTCATCTGCATTCATACAAAAAAGTCTTGGTAGTGGTACTTTTGCGTTATTACCTCCGATATCTACGCACCCCCCAACCCCCCTGCTACAGTAAAGAGTGTGAGTCTACTGTACATGCTTACTAACTCTCTCTCCAAGACGGCACATCTGAGCACCAGCCACAACCAACAAACGACTTCTACTTGAGTGTGGGGAGATTGCTCACAAGTCTGGACTGCCACGGATGACTAAAGTTTGAGCGTTTAATCCGCCAAATGACCACACTGTGCATAAACTCGATTGCCAGCGAAATAGAGTTGCTTTACTAAGCACAAAGTCTGTTGAGTTGGCTGAGACTTGGATATATAAAACGCTGCAGCGTCCCTCTCCAGACCTTTTCTGCAACTTGACATTTTCTTGTTAACGACACCATCACACA

Hybrid promoter P97

*K. phaffii PMA1 K. phaffii PGK1 Y. lipolytica FBA1*

AGGAAACCTCGATGATTCTCCCGTTCTTCCATGGGCGGGTATCGCAAAATGAGGAATTTTTCAAATTTCTCTATTGTCAAGACTGTTTATTATCTAAGAAATAGCCCAATCCGAAGCTCAGTTTTGAAAAAATCACTTCCGCGTTTCTTTTTTACAGCCCGATGAATATCCAAATTTGGAATATGGGGTACTCTATCGGGACTGCAGATAATATGACAACAACGCAGATTACATTTTAGGTAAGGCATAAATTCTACAGGCACGTGCGAGGCAAGCAATCTACTAATGTTTATTTTTCGTCCAACCTAATTGTGGTTTCAAAGCGCTATCAGGTGGGGGGTAAGAGGAATGTGAGTGGAAAGCGAAAATAACTGGCAGCTGGGGTCAGATCCCGTGATGCCACCTCTTGTGGTATTTTGAAACGCGTGTTGCGATTGGCCGCGAGAACGGAAAGGAATATATTTACTGCCGATCGCATTTTGGCCTCAAATAAATCTTGAGCTTTTGGACATAGGTCTGTGGACACATGTCATGTTAGTGTACTTCAATCGCCCCCTGGATATAGCCCCGACAATAGGCCGTGGCCTCATTTTTTTGCCTTCCGCACATTTCCATTGCTCGGTACCCACACCTTGCTTCTCCTGCACTTGCCAACCTTAATACTGGTTTACATTGACCAACATCTTACAAGCGGGGGGCTTGTCTAGGGTATATATAAACAGTGGCTCTCCCAATCGGTTGCCAGTCTCTTTTTTCCTTTCTTTCCCCACAGATTCGAAATCTAAACTACACATCACACA

Hybrid promoter P98

*Y. lipolytica PGK1 O. polymorpha CYC1 O. polymorpha PSH1*

CAGACAGTGACGAGTCATACATTCTCCGTATAATATCGTGTATGTCCAGACGATAGTCGTACTCGTACTCGTTACTGTAACTACTGTGCGAGTACTCGTGCATGTATCGTAGGTATTGTATGTTCGAGTACATACACATACGATACCAAACACTGCCCACTGTTCTGTCATGTTAGATCATGGCGGGGCCACGTGACTTGCATGCAGGTTTGGCATTGAATATTCAGCGTGGCTACTACAAGTAGTACATACTGTATCAATACGATTGTACATACGGTACTGGGTTTCGCAAACAACATGGTAAAATTACAAATGTGACTATTTTTCCACTTTTTATTTTGGTACACTGGCCTTTCTTTTTGCCATCAGCGCAATTCCCGACACCCGTGCACCGCGACACCCAAAAGTTGTCATTGAAATTTTCTCGCCGTTTGAGATCGCTTTTGGAAAAAAAGAAAAAAATTACCTGGAAGCTCGTAGAATCCAGGGAGCCGAGGAATAAACTGGGGGTGCACAGCCTTACACCTTGTTATATATCTCGAGCACACGATCAAAGTGCTACAAAACCAGTACGACCACATCAGCGCACAGCATATGCAAAATTTGGACCAGTATCTAAAGAAAATGGCCCGCTGGAGGGAAATTGTATAAAGATAGACAAATCGACTAAATTTCTAAAACACAAAATAATTTTTTATGATCCACATGGATGGAAGTGCTCAAGTTATTGCAATCCTTGGGGGATGAGAACAAGAAGGACTTGATGCGACGCAGTGTCGAGGTCTTTACTTGTACCATCA

Hybrid promoter P99

*Y. lipolytica GPDH O. polymorpha PFK2 K. phaffii AOX1*

GTAGGTTGGGTTGGGTGGGAGCACCCCTCCACAGAGTAGAGTCAAACAGCAGCAGCAACATGATAGTTGGGGGTGTGCGTGTTAAAGGAAAAAAAAAGAAGCTTGGGTTATATTCCCGCTCTATTTAGAGGTTGCGGGATAGACGCCGACGGAGGGCAATGGCGCCATGGAACCTTGCGGATATGGGGACGCCGCGGCGGACTGCGTCCGAACCAGCTCCAGCAGCGTTTTTTCCGGGCCATTGAGCCGACTGCGACCCCGCCAACGTGTCTTGGCGCAACATTCGGGAGCAGCTGGAGCGTATGTGTGAGCGGATGGGGCTTTTGGACGCAAACCAGCCGGTTTTGGACCACGACCGACTGCTTGTGAACGTGCTGAAGAGCATTGTGGCTGGCTTTTTCGTCAATGCTGCGCAGCTGAGCCGGTCCGGCGACTCGTACCGGTCGATGAAAAAGAACCAGGCGGTGTGGATGCATCCGTCGTCGGTGCTGTTCGGCGTGAAGCCGCCGCCGAAGCTGGTGATTTGGATGATTATGCATTGTCTCCACATTGTATGCTTCCAAGATTCTGGTGGGAATACTGCTGATAGCCTAACGTTCATGATCAAAATTTAACTGTTCTAACCCCTACTTGACAGCAATATATAAACAGAAGGAAGCTGCCCTGTCTTAAACCTTTTTTTTATCATCATTATTAGCTTACTTTCATAATTGCGACTGGTTCCAATTGACAAGCTTTTGATTTTAACGACTTTTAACGACAACTTGAGAAGATCAAAAAACAACTAATTATTCGAAACA

Hybrid promoter P101

*Y. lipolytica PGK1 Y. lipolytica ZWF1 Y. lipolytica GND2*

CAGACAGTGACGAGTCATACATTCTCCGTATAATATCGTGTATGTCCAGACGATAGTCGTACTCGTACTCGTTACTGTAACTACTGTGCGAGTACTCGTGCATGTATCGTAGGTATTGTATGTTCGAGTACATACACATACGATACCAAACACTGCCCACTGTTCTGTCATGTTAGATCATGGCGGGGCCACGTGACTTGCATGCAGGTTTGGCATTGAATATTCAGCGTGGCTACTACAAGTAGTACATACTGTATCAATACGATTGTACATACGGTACTCACCCTTTGCTACAGTATGTACATACAAGGGCGCAACAGAGCCGAGTTTAATGGTTTGAAACCTAGGTGGAAGAGGGGCGGGCGAGGTATCGTACTGTGGGTGCGATAGTTCACCAGTCACGCTGGTGGGCCATTCTCTTAGCACATTTCCCCCCTCCCAAGTCCCCTCAACCCCCAATGTAACCCTCAACCTCCCACAGCTCAGTAGCACACGTGCAACTAGTTAGTAACAACCCCCCTCCGTCCAGCTTCTCTTTCACACTGCTTAGAGTTCGACTTCTACTTGAGTGTGGGGAGATTGCTCACAAGTCTGGACTGCCACGGATGACTAAAGTTTGAGCGTTTAATCCGCCAAATGACCACACTGTGCATAAACTCGATTGCCAGCGAAATAGAGTTGCTTTACTAAGCACAAAGTCTGTTGAGTTGGCTGAGACTTGGATTTATAAAACGCTGCAGCGTCCCTCTCCAGACCTTTTCTGCAACTTGACATTTTCTTGTTAACGACACCATCACACA

Hybrid promoter P103

*K. lactis ENO1 Y. lipolytica ENO2 Y. lipolytica GPDH*

GGGACAAAGAAGAATCTTCGTTCTTCTTTCTTGTTCTCAACTTCCCAGCTTCCGTGTGATTACCCTCCGGGACAACAGAAAAACTGGCATTCGGTATCCCGGGAATCTGCTGAGAAGGAAAGAAAACGAAAAAAAAATTGTACATTTGTGTCACATTATGAATTACAGGAAGTCAGAAAACAGGGGGGACATGTCTCGCACATGCATGTCCATCAGACGAGACATTATGAGACATGCACGCGTGTGAGACTTAGCTACAGAATAAAGCTCGGTAGCGCCAACAGCGTTGACAAATAGCTCAAGGGCGTGGAGCACAGGGTTTAGGAGGTTTTAATGGGCGAGAAGGCGCGTAGATGTAGTCTTCCTCGGTCCCATCGGTAATCACGTGTGTGCCGATTTGCAAGACGAAAAGCCACGAGAATAAACCGGGAGAGGGGATGGAAGTCCCCGAACAGCAACCAGCCCTTGCCCTCGTGGACATAACCTTTCACTTGCCAGAACTCTAAGCGTCACCACGGTATACAAGCGCACGTAGAAGATCCTCGAATTTCAGACCAGTCACGGCCCCATTCGCCCGCGCAATGGCTCGCCAACGCCCGGTCTTTTGCACCACATCAGGTTACCCCAAGCCAAACCTTTGTGTTAAAAAGCTTAACATATTATACCGAACGTAGGTTTGGGCGGGCTTGCTCCGTCTGTCCAAGGCAACATTTATATAAGGGTCTGCATCGCCGGCTCAATTGAATCTTTTTTCTTCTTCTCTTCTCTATATTCATTCTTGAATTAAACACACATCAACA

**11. REFERENCES**

1. Horton RM, Hunt HD, Ho SN, Pullen JK, Pease LR. Engineering hybrid genes without the use of restriction enzymes: gene splicing by overlap extension. *Gene* **77**, 61-68 (1989).

2. Hoof JB, Nodvig CS, Mortensen UH. Genome Editing: CRISPR-Cas9. *Methods in molecular biology* **1775**, 119-132 (2018).

3. Magnan C*, et al.* Sequence assembly of *Yarrowia lipolytica* strain W29/CLIB89 shows transposable element diversity. *PloS one* **11**, e0162363 (2016).

4. Fernandez-Canon JM, Penalva MA. Characterization of a fungal maleylacetoacetate isomerase gene and identification of its human homologue. *The Journal of biological chemistry* **273**, 329-337 (1998).

5. Carreira A, Ferreira LM, Loureiro V. Brown pigments produced by *Yarrowia lipolytica* result from extracellular accumulation of homogentisic acid. *Applied and environmental microbiology* **67**, 3463-3468 (2001).

6. Bassel J, Hambright P, Mortimer R, Bearden AJ. Mutant of the yeast *Saccharomycopsis lipolytica* that accumulates and excretes protorphyrin IX. *Journal of bacteriology* **123**, 118-122 (1975).

7. Barth G, Weber H. Genetic studies on the yeast *Saccharomycopsis lipolytica*. Inactivation and mutagenesis. *Zeitschrift fur allgemeine Mikrobiologie* **23**, 147-157 (1983).

8. Carreira A, Dillinger K, Eliskases-Lechner F, Loureiro V, Ginzinger W, Rohm H. Influence of selected factors on browning of Camembert cheese. *The Journal of dairy research* **69**, 281-292 (2002).

9. Carreira A, Paloma L, Loureiro V. Pigment producing yeasts involved in the brown surface discoloration of ewes' cheese. *International journal of food microbiology* **41**, 223-230 (1998).

10. Warner JR. The economics of ribosome biosynthesis in yeast. *Trends in biochemical sciences* **24**, 437-440 (1999).

11. Keren L*, et al.* Promoters maintain their relative activity levels under different growth conditions. *Molecular systems biology* **9**, 701 (2013).
